# Supplementary material
Source: PubMed Central journal article supplement (PMC5173459)

1  
2  
3  
4  
5  
6  
7  
8  
9  
10  
11  
12  
13  
14  
15  
16  
17  
18  
19  
20  
21  
22  
23  
24  
25  
26  
27  
28  
29  
30  
31  
32  
33  
34  
35  
36  
37  
38  
39  
40  
41  
42  
43  
44  
45  
46  
47  
48  
49  
50  
51  
52  
53  
54  
55  
56  
57  
58  
59  
60

1  
2  
3  
4  
5  
6  
7  
8  
9  
10  
11  
12  
13  
14  
15  
16  
17  
18  
19  
20  
21  
22  
23  
24  
25  
26  
27  
28  
29  
30

**Health care for children with diabetes mellitus in low-income families:  
a population-based cohort study of health systems in Ontario and California**

Sunitha V. Kaiser, MD MSc,<sup>a</sup> Vandana Sundaram, MPH,<sup>b</sup> Eyal Cohen, MD MSc,<sup>c,d</sup>  
Rayzel Shulman, MD PhD,<sup>d,e</sup> Jun Guan MSc,<sup>d</sup> Lee Sanders, MD MPH,<sup>\*b,f</sup> Astrid Guttman,  
MDCM MSc\*<sup>c,d</sup>

**Affiliations:**

<sup>a</sup>Department of Paediatrics, University of California San Francisco, 550 16th Street, Box 0110,  
San Francisco, CA 94158

<sup>b</sup>Centre for Policy, Outcomes and Prevention, Stanford University, 300 Pasteur Drive, Room  
H310, Palo Alto, CA 94305

<sup>c</sup>Division of Paediatric Medicine, Department of Paediatrics, Hospital for Sick Children and the  
University of Toronto, 555 University Avenue, Toronto, ON M5G 1X8, Canada

<sup>d</sup>Institute for Clinical Evaluative Sciences, 2075 Bayview Ave., G-Wing, Toronto, Ontario M4N  
3M5, Canada

<sup>e</sup>Division of Endocrinology, Department of Paediatrics, Hospital for Sick Children and the  
University of Toronto, 555 University Avenue, Toronto, ON M5G 1X8, Canada

<sup>f</sup>Division of General Pediatrics, Stanford University, 300 Pasteur Drive, Room H310, Palo Alto,  
CA 94305

\*equal contribution as senior authors

**Corresponding Author:** Dr. Astrid Guttman (astrid.guttman@ices.on.ca)

1  
2  
3 1 **Abstract**  
4  
5

6 2 **Background:** Children with diabetes mellitus in low-income families have poor outcomes, but  
7  
8  
9 3 little is known about how this relates to healthcare system structure. Our objective was to gain  
10  
11 4 insight into how best to structure health systems to serve these children by describing their  
12  
13 5 healthcare utilization in two varying health system models: 1) Canadian model with an organized  
14  
15 6 diabetes care network including generalists, 2) US model with targeted support services for  
16  
17 7 children from low-income families.  
18  
19

20  
21  
22 8 **Methods:** Population-based retrospective cohort study of children 1-17 years with type 1  
23  
24 9 diabetes mellitus between 2009-2012 in the California Children's Services program and Ontario  
25  
26 10 using administrative data. Ontario Drug Benefit Program enrolment used to identify children  
27  
28 11 from low-income families. Proportions of children receiving  $\geq 2$  diabetes routine visits/year  
29  
30 12 compared using Chi-square tests and diabetes-complication hospitalization rates compared using  
31  
32 13 direct standardization.  
33  
34  
35

36  
37 14 **Results:** More California children from low-income families (n=4922) received diabetes routine  
38  
39 15 care from paediatric endocrinologists (63.9% versus 26.9%, p<0.001) and used insulin pumps  
40  
41 16 (22.8% versus 16.4%, p<0.001) compared to Ontario children (n=2050). California children from  
42  
43 17 low-income families were less likely to receive  $\geq 2$  diabetes routine visits/year compared to  
44  
45 18 Ontario children (64.7% versus 75.7%, p<0.001), but had clinically comparable diabetes-  
46  
47 19 complication hospitalization rates (Absolute Differences 0.02 [95% Confidence Interval 0.02-  
48  
49 20 0.02] for males and 0.03 [0.03-0.03] hospitalizations/patient-year for females).  
50  
51  
52

53  
54 21 **Interpretation:** Ontario children from low-income families received more diabetes routine care  
55  
56 22 compared to California children from low-income families and had clinically comparable rates of  
57  
58  
59  
60

1  
2  
3  
4  
5  
6  
7  
8  
9  
10  
11  
12  
13  
14  
15  
16  
17  
18  
19  
20  
21  
22  
23  
24  
25  
26  
27  
28  
29  
30  
31  
32  
33  
34  
35  
36  
37  
38  
39  
40  
41  
42  
43  
44  
45  
46  
47  
48  
49  
50  
51  
52  
53  
54  
55  
56  
57  
58  
59  
60

1 diabetes-complication hospitalizations. Diabetes care networks that integrate generalists may  
2 play a role in improving access and outcomes for the growing population of children with  
3 diabetes.

Confidential

1  
2  
3 **Background:**  
4

5           The prevalence of type 1 diabetes mellitus in children has been rapidly growing; between  
6  
7  
8 2001-2009, it rose 22% in the United States (from 1.5 to 1.9 per 1000)(1) and 34% in Canada  
9  
10 (from 2.0 to 3.0 per 1000) among children age  $\leq 19$  years.(2) Children with diabetes mellitus  
11  
12 suffer severe morbidity and three-fold increased mortality,(3) primarily due to acute, potentially  
13  
14 preventable complications(4) (e.g. diabetic ketoacidosis). Children from low-income families are  
15  
16 at highest risk-- they have poorer disease control, higher rates of life-threatening complications,  
17  
18 and worse outcomes.(5-7) It is unknown how different health system models affect health care  
19  
20 delivery and outcomes for children with diabetes mellitus.  
21  
22  
23

24           In Ontario, Canada, legal residents have universal access to health care and children with  
25  
26 diabetes mellitus receive care from a network of specialized centres that integrate generalists.  
27  
28 Since health insurance is universal, few programs specifically target support to children from  
29  
30 low-income families. In contrast, in the United States, care for children with diabetes mellitus is  
31  
32 covered by a variety of health-insurance payers (e.g., public, commercial, managed-care), as well  
33  
34 as a variety of care-system structures (e.g., independent medical providers, health-management  
35  
36 organizations). Federal funds (from Title V of the Social Security Act) enable programs such as  
37  
38 California Children's Services to target supports for children from low-income families who  
39  
40 suffer from chronic diseases, including diabetes mellitus.(8) The primary aim of this study was to  
41  
42 gain insight into how best to structure health care systems to meet the needs of children with  
43  
44 diabetes mellitus in low-income families by describing their demographics and health care  
45  
46 utilization patterns in these two varying health system models. The secondary aim of this study  
47  
48 was to examine outcomes across socioeconomic status within Ontario to better contextualize our  
49  
50 findings.  
51  
52  
53  
54  
55  
56  
57  
58  
59  
60

1  
2  
3 **Methods:**  
4

5  
6  
7  
8 ***Data Source and Study Design:***  
9

10 We performed a retrospective cohort analysis using well-validated population-based  
11 administrative health databases from California Children's Services(9) and Ontario(10, 11).  
12  
13 California Children's Services database contains demographics and information on all paid  
14  
15 hospital, emergency department, and outpatient visits for enrollees. This database has not been  
16  
17 not formally validated, but has been used in previous studies of children with diabetes.(9, 12) We  
18  
19 used the 2006 Canadian Census to assign neighbourhood income quintile. Ontario databases are  
20  
21 linked via unique encoded individual identifiers. These included:  
22  
23  
24

- 25  
26  
27 - Ontario Diabetes Database, a validated population-based database of all Ontario  
28  
29 residents with diabetes mellitus(13, 14)  
30  
31 - Registered Persons Database (demographics)  
32  
33 - Ontario Health Insurance Plan Database (physician billing claims), from which diabetes  
34  
35 diagnoses codes have been used in validation studies(13, 14)  
36  
37 - Ontario Drug Benefit Program Database  
38  
39 - Hospital Discharge Abstract Database, for which a diabetes diagnosis was found to be  
40  
41 accurate in 94.5% of charts included in a large re-abstraction study(15)  
42  
43 - National Ambulatory Care Registry (emergency department information) with 84%  
44  
45 overall inter-rater reliability of diagnosis information(16)  
46  
47  
48  
49  
50  
51 - Physician Database  
52  
53  
54  
55  
56  
57  
58  
59  
60

1  
2  
3 1 - Assistive Devices Program database, which although not formally validated, has  
4  
5 2 prevalence of insulin pump use in children that matches prospectively collected data on  
6  
7 3 this population(17)

8  
9 4 ~~Ontario databases are linked via unique encoded individual identifiers; these included 1)~~  
10  
11 5 ~~Ontario Diabetes Database, a validated population-based database of all Ontario residents with~~  
12  
13 6 ~~diabetes mellitus,(12, 13) 2) Registered Persons Database (demographics), 3) Ontario Health~~  
14  
15 7 ~~Insurance Plan Database (physician billing claims), 4) Ontario Drug Benefit Program Database,~~  
16  
17 8 ~~5) Hospital Discharge Abstract Database, 6) National Ambulatory Care Registry (emergency~~  
18  
19 9 ~~department information), 7) Physician Database, and 8) Assistive Devices Program database.~~  
20  
21 10 ~~We used the 2006 Canadian Census to assign neighbourhood income quintile.~~  
22  
23  
24  
25  
26

27 11 ***Study Population/Setting:***

28  
29 12 We included all children ages 1-17 years with diabetes mellitus from 2009-2012 enrolled  
30  
31 13 in the California Children's Services program or residing in Ontario. We identified children in  
32  
33 14 the California Children's Services program with diabetes mellitus by identifying children with  
34  
35 15 the International Classification of Diseases, Ninth Revision, Clinical Modification code 250  
36  
37 16 (diabetes mellitus) listed as the eligible diagnosis code and with at least one insulin claim  
38  
39 17 **[Appendix 1]**.(12) In Ontario, we used the Ontario Diabetes Database (13) and divided children  
40  
41 18 into two cohorts: 1) those with Ontario Drug Benefit Program claims (children from low-income  
42  
43 19 families) and 2) all other children. We restricted all cohorts to children enrolled in healthcare  
44  
45 20 for  $\geq 365$  consecutive days. For the main two cohorts, California Children's Services and Ontario  
46  
47 21 Drug Benefit Program, we restricted to those with type 1 diabetes mellitus by excluding all  
48  
49 22 children using oral hypoglycaemics (used primarily in type 2 diabetes mellitus) using drug  
50  
51  
52  
53  
54  
55  
56  
57  
58  
59  
60

1  
2  
3 1 identification numbers (children in Ontario Drug Benefit Program) and national drug codes  
4  
5  
6 2 (children in California Children's Services) [Appendix 1].  
7

8 3 California and Ontario are the most populous state and province in the United States and  
9  
10 4 Canada, respectively.(18, 19) In 2010, children <18 years represented 25% of the California  
11  
12 5 population, and children <20 years represented 23% of the Ontario population.(20, 21)  
13  
14 6 California Children's Services supports care for children from low-income families with certain  
15  
16 7 chronic diseases, including diabetes mellitus.(8) The program sets resource and care  
17  
18 8 standards(22, 23) for the multidisciplinary care of children with diabetes mellitus at California  
19  
20 9 Children's Services approved clinics, and can provide supplemental funding for clinics to meet  
21  
22 10 these standards. California Children's Services also provides supplemental coverage for medical  
23  
24 11 devices (e.g. glucometers, lancets) and case-management support (public health insurance  
25  
26 12 enrolment, accessing care through California Children's Services approved centres, securing  
27  
28 13 transportation, monitoring adherence).  
29  
30  
31  
32  
33

34 14 In Ontario, every legal resident has access to universal government insurance that covers  
35  
36 15 all medically necessary healthcare services except prescription drugs. Drug costs are handled out  
37  
38 16 of pocket, with private extended health benefits, or through the Ontario Drug Benefit Program  
39  
40 17 (covers those >65 years and those who receive social assistance). Medical care for children with  
41  
42 18 diabetes mellitus in Ontario is provided by the Ontario Paediatric Diabetes Network, which  
43  
44 19 consists of specialized paediatric diabetes centres (thirty secondary-level and five tertiary-level).  
45  
46 20 These centres have multidisciplinary core teams consisting of nurses, dieticians, and social  
47  
48 21 workers that work closely with paediatricians, and/or paediatric endocrinologists, and/or family  
49  
50 22 physicians to provide comprehensive care.(24)  
51  
52  
53  
54  
55  
56  
57  
58  
59  
60

1  
2  
3 1 ***Patient Characteristics:***  
4

5 2 Socioeconomic status for children in Ontario was described using Ontario Drug Benefit  
6  
7  
8 3 Program enrolment and neighbourhood income quintile at the level of the dissemination area  
9  
10 4 (representing a population of  $\approx 400-700$  individuals) adjusted for household and community  
11  
12 5 size.(25) Children were eligible for Ontario Drug Benefit Program if expected prescription costs  
13  
14 6 were  $>4\%$  of household income, or if their families were receiving social assistance. Children  
15  
16 7 were eligible for California Children's Services if medical expenses were  $>20\%$  of household  
17  
18 8 income(8) or if household income was  $<250\%$  of the federal poverty line (annual household  
19  
20 9 income  $< \$22,050$  in 2009)(26). For children in California Children's Services, race and primary  
21  
22 10 insurance were used to describe SES. During the study period, children in California qualified  
23  
24 11 for Medicaid if household income was  $<100-133\%$  of federal poverty level.(27)  
25  
26

27 12 We identified insulin pump utilization using the Assistive Devices Program database  
28  
29 13 (Ontario), and billing claims for insulin pumps or pump batteries (California Children's Services)  
30  
31 14 [Appendix 1]. We determined specialty of diabetes care provider by identifying the physician  
32  
33 15 providing the majority of outpatient diabetes care (diagnosis code 250.xx), then using the  
34  
35 16 physician database (Ontario) and the National Provider Identifier (California Children's  
36  
37 17 Services). Distance from nearest diabetes centre was determined using home postal code.(28)  
38  
39 18 We defined urban location in California using the United States Department of Agriculture  
40  
41 19 definition (county population of  $\geq 250,000$ )(29) and in Ontario using the Statistics Canada  
42  
43 20 definition ( $\geq 400$  persons per square kilometre).(19) Any missing data were described.  
44  
45  
46  
47  
48  
49  
50  
51  
52

53 22 ***Outcome Measures:***  
54  
55  
56  
57  
58  
59  
60



1 We determined diabetes mellitus complication hospitalization rates using the Agency for  
2 Healthcare Research and Quality specifications (primary diagnoses: diabetic ketoacidosis,  
3 diabetes with hyperosmolarity, diabetes with coma, or uncontrolled diabetes).(30) ICD-9-CM  
4 codes were translated to ICD-10 for Ontario [Appendix 1]. We excluded hospitalizations for  
5 therapy initiation, defined as those within 30 days of diabetes mellitus diagnosis (Ontario) or  
6 California Children’s Services enrolment (California). We determined the proportion of children  
7 receiving  $\geq 2$ / outpatient diabetes routine visits per year [Appendix 1](31-33), rates of diabetes  
8 mellitus complication emergency department visits not resulting in hospitalizations (using the  
9 same codes as for diabetes mellitus complication hospitalizations), and rates of all other  
10 hospitalizations (to explore whether there may be different admission thresholds across  
11 jurisdictions).

12  
13 ***Analysis:***

14 We did separate but parallel analyses on both cohorts, as privacy legislation does not  
15 allow data from the two jurisdictions to be merged. We compared characteristics of children in  
16 our low-income cohorts (California Children’s Services and Ontario Drug Benefit Program)  
17 using  $\chi^2$  tests for categorical variables and Student’s t-tests for continuous variables. In order to  
18 compare diabetes mellitus complication hospitalization rates per person-year, we used direct  
19 standardisation to control for differences in age distribution and stratified by sex (standardised to  
20 2010 California age distribution(18)). We then calculated absolute differences of rates with 95%  
21 confidence intervals. We compared proportions of children receiving  $\geq 2$  diabetes mellitus routine  
22 visits/year using  $\chi^2$  tests. We also compared characteristics and health care utilization within  
23 Ontario, comparing children from low-income families to all other Ontario children. We also

1 performed a sensitivity analyses including only children using insulin pumps (to explore if rates  
2 differed by pump use).

3 This study was approved by the Hospital for Sick Children (Toronto, Canada),  
4 Sunnybrook Health Science Centre (Toronto, Canada), and Stanford University (Palo Alto,  
5 United States) research ethics boards. SAS 9.2 (SAS Institute, Cary, NC) was used for analyses.

### 7 **Results:**

8 Characteristics of children with diabetes mellitus from low-income families in California  
9 (California Children's Services) and Ontario (Ontario Drug Benefit Program) are described in  
10 **Table 1**. There were 4,922 children from low-income families in California (11,836 patient-  
11 years, mean=2.4 years) and 2,050 children from low-income families in Ontario (5,300 patient-  
12 years, mean=2.6 years). There was a smaller proportion of male children from low-income  
13 families in California ( $p<0.001$ ). A higher proportion children from low-income families in  
14 California were on insulin pumps compared to Ontario (22.8% versus 16.4%,  $p<0.001$ ). Over  
15 twice as many children from low-income families in California had diabetes mellitus care by  
16 paediatric endocrinologists compared to Ontario (63.9% versus 26.9%,  $p<0.001$ ).

17 Age-standardized diabetes mellitus complication hospitalization rates are presented in  
18 **Figure 1**. Children from low-income families in Ontario had clinically comparable rates to  
19 children in California (0.06 versus 0.08 hospitalizations/patient-year for males and 0.08 versus  
20 0.11 hospitalizations/patient-year for females, Absolute Differences 0.02 [95% Confidence  
21 Interval (CI): 0.02-0.02]) for males and 0.03 [95% CI 0.03-0.03] for females.

1           **Table 2** shows a higher proportion of children from low-income families in Ontario  
2 received  $\geq 2$  diabetes routine visits per year compared to children in California (75.7% versus  
3 64.7%,  $p < 0.001$ ). Children from low-income families in Ontario had an equal rate of diabetes  
4 mellitus complication emergency department visit rates to children in California (0.03  
5 visits/patient-year,  $p = 1$ ). We found no differences in rates of other hospitalizations.

### 6 7 ***Ontario Children from Low-Income Families Compared to All Other Ontario Children with*** 8 ***Diabetes Mellitus***

9           A lower proportion of Ontario children from low-income families (Ontario Drug Benefit  
10 Program) were on insulin pumps compared to other Ontario children (16.4% versus 23.5%,  
11  $p < 0.001$ ) [**Table 3**]. Children from low-income families in Ontario had higher diabetes mellitus  
12 complication hospitalization rates compared to all other Ontario children with diabetes mellitus  
13 (0.06 versus 0.02 hospitalizations/patient-year for males and 0.08 versus 0.03  
14 hospitalizations/patient-year for females, Absolute Differences 0.04 [0.04-0.04] and 0.05 [0.05-  
15 0.05]). However, a slightly higher proportion of children from low-income families in Ontario  
16 received  $\geq 2$  diabetes routine visits per year (75.7% versus 71.0%,  $p < 0.001$ ).

### 17 18 ***Comparisons in Insulin Pump Users***

19           Among children from low-income families in California, age-sex standardized diabetes  
20 mellitus complication hospitalization rates were lower for children on versus off insulin pumps  
21 (0.07 [0.06-0.08] versus 0.09 [0.09-0.10] hospitalizations/patient-year, Absolute Difference 0.02

1  
2  
3 1 [95% CI 0.02-0.02]). In children from low-income families in Ontario, there were no  
4  
5  
6 2 differences by pump status. There were no differences in standardized diabetes mellitus  
7  
8 3 complication hospitalization rates between children from low-income families in California and  
9  
10 4 Ontario on pumps.

11  
12  
13  
14 5  
15  
16 6 **Interpretation:**

17  
18 7 In this large, population-based cross-national study, we found significant differences in  
19  
20 8 health care delivery for children with type 1 diabetes mellitus from low-income families. Care  
21  
22 9 for most children from low-income families in California was provided by paediatric  
23  
24 10 endocrinologists, while in Ontario it was provided by general paediatricians. Ontario children  
25  
26 11 from low-income families were more likely to receive diabetes mellitus routine care compared to  
27  
28 12 California children from low-income families, but had clinically comparable rates of diabetes  
29  
30 13 mellitus complication hospitalizations.

31  
32  
33  
34  
35  
36 14 Major structural differences exist in how care is provided in California and Ontario, and  
37  
38 15 these differences may contribute to some of our findings. In Ontario, the Ontario Paediatric  
39  
40 16 Diabetes Network aids generalists in providing diabetes care by linking them to paediatric  
41  
42 17 endocrinologists and multi-disciplinary teams at tertiary centres.(8) In contrast, most physician  
43  
44 18 care in California Children's Services is provided directly by paediatric endocrinologists. Given  
45  
46 19 the higher rates of routine visits and clinically comparable diabetes mellitus complication rates in  
47  
48 20 Ontario, our findings suggest that models of care with generalists practicing within  
49  
50 21 multidisciplinary diabetes settings may be effective. Previous studies comparing care models of  
51  
52 22 subspecialist versus shared-care (generalists and paediatric endocrinologists) for children with  
53  
54 23 diabetes mellitus found no differences in adherence to guideline recommendations or glycaemic  
55  
56  
57  
58  
59  
60

1 control.(5, 31) Shared-care models may help overcome geographic barriers to accessing care,  
2 which is important in the context of our findings that children in California Children's Services  
3 lived further from the nearest diabetes mellitus centres.(31) Given the rising prevalence of  
4 diabetes mellitus, shared-care models may become essential for meeting health care needs of this  
5 growing population. A 2008 US study found significant geographic disparities in supply of  
6 paediatric endocrinologists. Authors concluded that shared-care models and increased capacity  
7 of primary care physicians as medical homes were essential to address the needs of children with  
8 diabetes mellitus.(34)

9 We found lower complication rates for children from low-income families in California  
10 on compared to those not on insulin pumps. Previous Canadian work investigating the  
11 relationship between social determinants of health and glycaemic control in children with  
12 diabetes mellitus demonstrated that children who were most deprived had poorer glycaemic  
13 control and lower rates of pump use; however, pump use had a moderating effect on  
14 socioeconomic gradients in glycaemic control.(7) This is in line with our findings in children  
15 from low-income families in California. Pump use is higher among children from low-income  
16 families in California compared to Ontario, and a significant socioeconomic gradient exists  
17 within Ontario. Ontario has eligibility criteria for pump funding, but there are no such guidelines  
18 in California. Greater insulin pump use among children from low-income families in California  
19 may also be due to greater clinic support (care coordinators), comfort with pump use in high-risk  
20 populations, professional detailing by pump manufacturers, or commercial pressures due to a  
21 fee-for-service payment system. Ontario covers 100% of pump cost, but only 75% of pump  
22 supply costs, which may create a barrier for low-income families. Further research is needed to  
23 establish whether pumps can moderate socioeconomic gradients in health outcomes for children

1  
2  
3 1 with diabetes, and, if so, how best to support access to pumps for children from low-income  
4  
5  
6 2 families.  
7  
8

9 3 In order to gain insight into how best to structure health care systems to meet the needs of  
10  
11 4 children with diabetes mellitus in low-income families, we focused our study to two settings in  
12  
13 5 which we could clearly describe details of how the health systems are structured for readers to  
14  
15 6 understand and contrast. California and Ontario were selected for our analysis to increase the  
16  
17 7 generalizability of our study--they are the most populous state and province in the United States  
18  
19 8 and Canada, respectively, and share highly diverse populations with similar proportions of  
20  
21 9 immigrants.(19, 35-37) However, some of the differences we observed in care and outcomes  
22  
23 10 may be due to population differences. The administrative data from both jurisdictions were  
24  
25 11 limited by lack of important information such as direct measures of socio-economic status and  
26  
27 12 glycaemic control. Low household income has been shown to be a strong determinant of health  
28  
29 13 outcomes in children with diabetes mellitus,(5-7) and our findings of higher diabetes mellitus  
30  
31 14 complication hospitalization rates in Ontario children from low-income families compared to all  
32  
33 15 other Ontario children are likely a reflection of the powerful effects of socio-economic factors.  
34  
35 16 California Children's Services eligibility required an annual household income of <\$22,050 in  
36  
37 17 2009 (or medical expenses >20% of income), and the majority of children in Ontario Drug  
38  
39 18 Benefit Program were in the lowest income quintiles (annual household income ≈\$20,000 for  
40  
41 19 quintile 1 in 2009)(38) indicating comparability to children in California Children's Services.  
42  
43 20 However, neighbourhood income quintile is a proxy measure of household income. Previous  
44  
45 21 studies have demonstrated good correlation between these data and individual household income  
46  
47 22 in another Canadian province, and this method is widely used in Canadian health services  
48  
49 23 research,(39, 40) but the precision of this ecologic methodology may be more limited in rural  
50  
51  
52  
53  
54  
55  
56  
57  
58  
59  
60

1 areas and by practices such as renting suites in homes. Secondly, for our comparisons of  
2 children within Ontario with diabetes mellitus (those from low-income families versus all other  
3 children), we were unable to exclude children in “all other” group who were on oral  
4 hypoglycaemics, as drug utilization data were only available for children in Ontario Drug Benefit  
5 Program. A higher proportion of children with type 2 diabetes mellitus in the “all other” group  
6 may contribute to the lower rates of complications compared to children from low-income  
7 families (although rates of type 2 diabetes mellitus are very low in Canadian children(17, 41)).  
8 Thirdly, we utilized differing strategies for identifying children with diabetes mellitus in  
9 California Children’s Services and Ontario. Our strategies have been used in prior analyses(12,  
10 13); however, that used in California Children’s Services has not been formally validated, and  
11 thus may contribute to differences between the study cohorts. Lastly, we were unable to  
12 contextualize our findings in California by comparing outcomes with children from higher  
13 income families, as there are no population-based California data for these children. In order to  
14 ensure quality and validity of our analysis, we used comparable data sources from each country,  
15 created consistent definitions across jurisdictions, compared similar populations during the same  
16 time interval, and carefully considered differences across systems that might explain the  
17 variation we observed. Nevertheless, this study highlights the challenges of such cross-  
18 jurisdictional analysis, as it is impossible to make causal assumptions of the health-system level  
19 determinants of the outcomes measured.

## 21 **Conclusions and Implications:**

22 Ontario children with diabetes mellitus in low-income families more commonly received  
23 diabetes routine care from generalists supported by a diabetes care network. These children were

1  
2  
3 1 more likely to receive routine care and had clinically comparable diabetes complication  
4  
5 2 hospitalization rates to children for low-income families in California. Developing diabetes  
6  
7  
8 3 networks that integrate generalists may play a role in increasing utilization of routine diabetes  
9  
10 4 care and reducing complications for children. The significant disparities in diabetes mellitus  
11  
12 5 outcomes within the universal access system in Ontario suggest an important research and policy  
13  
14 6 focus to improve observed socioeconomic gradients in health outcomes for this growing  
15  
16 7 population of children.  
17  
18  
19  
20 8

21  
22 9 **List of Abbreviations:** CI- Confidence Interval  
23  
24

25 10  
26  
27  
28 11 **Competing Interests:**

29  
30 12 The authors declare that they have no competing interests  
31  
32  
33 13

34  
35 14 **Author's Contributions:**

36  
37 15 All authors were involved in the conceptualization and design of the study. VS conducted the  
38  
39 16 California Children's Services analysis, JG the Ontario data analysis. SK interpreted both the  
40  
41 17 Ontario and California analyses and drafted the manuscript. All authors critically revised the  
42  
43 18 manuscript. All authors read and approved the final manuscript and agree to act as guarantors of  
44  
45 19 this work.  
46  
47  
48  
49 20

50  
51 21 **Acknowledgements:**

52  
53  
54  
55 22 This work was supported in part with funding from the California Health Care Foundation.  
56  
57 23 Astrid Guttmann receives salary support through an Applied Research Chair in Child Health  
58  
59  
60



1  
2  
3 1 Services Research from the Canadian Institutes of Health Research and operating funding for the  
4  
5 2 Ontario analyses came from this Research Chair and with support from the Institute for Clinical  
6  
7 3 Evaluative Sciences that is funded by an annual grant from the Ontario Ministry of Health and  
8  
9 4 Long-Term Care. The Institute for Clinical Evaluative Sciences is a non-profit organization  
10  
11 5 funded by the Ontario Ministry of Health and Long-Term Care with provision of population-  
12  
13 6 based data. Parts of this paper are based on data compiled by the Canadian Institute for Health  
14  
15 7 Information.  
16  
17  
18  
19

20  
21 8 The opinions, results and conclusions reported in this paper are those of the authors and are  
22  
23 9 independent from all funding sources. No endorsement by the Centre for Policy, Outcomes and  
24  
25 10 Prevention, the Institute for Clinical Evaluative Sciences, the Canadian Institute for Health  
26  
27 11 Information or the Ontario Ministry of Health and Long-Term Care is intended or should be  
28  
29 12 inferred.  
30  
31  
32

33 13

34  
35  
36 14  
37

38  
39 15  
40

41 16  
42

43 17  
44

45 18  
46

47 19  
48

49 20  
50

51 21  
52

53 22  
54

55 23  
56  
57  
58  
59  
60

1  
2  
3  
4 1  
5  
6 2  
7  
8 3  
9  
10 4  
11  
12 5  
13  
14 6  
15  
16 7  
17  
18 8  
19  
20 9  
21  
22 10 **References:**

- 23  
24 11 1. Dabelea D, Mayer-Davis EJ, Saydah S, Imperatore G, Linder B, Divers J, et al. Prevalence of  
25 12 type 1 and type 2 diabetes among children and adolescents from 2001 to 2009. *Jama*. 2014;311(17):1778-  
26 13 86.
- 27 14 2. Public Health Agency of Canada.. Diabetes in Canada: Highlights from the National Diabetes  
28 15 Surveillance System [Available from: [http://www.phac-aspc.gc.ca/publicat/2008/dicndss-dacsnsd-04-  
29 16 05/index-eng.php](http://www.phac-aspc.gc.ca/publicat/2008/dicndss-dacsnsd-04-05/index-eng.php).
- 30 17 3. O'Grady MJ, Delaney J, Jones TW, Davis EA. Standardised mortality is increased three-fold in a  
31 18 population-based sample of children and adolescents with type 1 diabetes. *Pediatr Diabetes*.  
32 19 2013;14(1):13-7.
- 33 20 4. Edge JA, Ford-Adams ME, Dunger DB. Causes of death in children with insulin dependent  
34 21 diabetes 1990-96. *Arch Dis Child*. 1999;81(4):318-23.
- 35 22 5. Hatherly K, Smith L, Overland J, Johnston C, Brown-Singh L, Waller D, et al. Glycemic control  
36 23 and type 1 diabetes: the differential impact of model of care and income. *Pediatr Diabetes*.  
37 24 2011;12(2):115-9.
- 38 25 6. Shi L, Lu N. Individual sociodemographic characteristics associated with hospitalization for  
39 26 pediatric ambulatory care sensitive conditions. *J Health Care Poor Underserved*. 2000;11(4):373-84.
- 40 27 7. Zuijdwijk CS, Cuerden M, Mahmud FH. Social determinants of health on glycemic control in  
41 28 pediatric type 1 diabetes. *J Pediatr*. 2013;162(4):730-5.
- 42 29 8. California Department of Health Care Services. California Children's Services: Program  
43 30 Overview 2014 [Available from: <http://www.dhcs.ca.gov/services/ccs/Pages/ProgramOverview.aspx>.
- 44 31 9. Swenson SM, Chamberlain LJ, Sanders LM, Sundaram V, Wise PH. Outpatient Pharmacy  
45 32 Expenditures for Children With Serious Chronic Illness in California, 2010-2012. *Jama*.  
46 33 2015;314(4):405-7.
- 47 34 10. Canadian Institute for Health Information. CIHI data quality study of Ontario emergency  
48 35 department visits for 2004–2005: volume II of IV—main study findings. . Ottawa, Canada; 2008.
- 49 36 11. Canadian Institute for Health Information. CIHI data quality study of the 2009–2010  
50 37 discharge abstract database. Ottawa, Canada; 2012.
- 51 38 12. Lee JM, Sundaram V, Sanders L, Chamberlain L, Wise P. Health Care Utilization and Costs of  
52 39 Publicly-Insured Children with Diabetes in California. *J Pediatr*. 2015;167(2):449-54 e6.

56  
57  
58  
59  
60

- 1  
2  
3  
4  
5  
6  
7  
8  
9  
10  
11  
12  
13  
14  
15  
16  
17  
18  
19  
20  
21  
22  
23  
24  
25  
26  
27  
28  
29  
30  
31  
32  
33  
34  
35  
36  
37  
38  
39  
40  
41  
42  
43  
44  
45  
46  
47  
48  
49  
50  
51  
52  
53  
54  
55  
56  
57  
58  
59  
60
13. Guttmann A, Nakhla M, Henderson M, To T, Daneman D, Cauch-Dudek K, et al. Validation of a health administrative data algorithm for assessing the epidemiology of diabetes in Canadian children. *Pediatr Diabetes*. 2010;11(2):122-8.
  14. Hux JE, Ivis F, Flintoft V, Bica A. Diabetes in Ontario: determination of prevalence and incidence using a validated administrative data algorithm. *Diabetes Care*. 2002;25(3):512-6.
  15. Juurlink D PC, Croxford R, Chong A, Austin P, Tu J, Laupacis A. Canadian Institute for Health Information Discharge Abstract Database: A Validation Study. . Toronto, Canada: Institute for Clinical Evaluative Sciences; 2006.
  16. Canadian Institute for Health Information. CIHI Data Quality Study of Ontario Emergency Department Visits for Fiscal Year 2004-2005- Executive Summary. . Ottawa, Canada; 2008.
  17. Shulman R, Miller FA, Stukel TA, Daneman D, Guttmann A. Resources and population served: a description of the Ontario Paediatric Diabetes Network. *CMAJ Open*. 2016;4(2):E141-6.
  18. United States Census Bureau. Single Years of Age and Sex: 2010 2011 [Available from: [http://factfinder2.census.gov/faces/tableservices/jsf/pages/productview.xhtml?pid=DEC\\_10\\_SF1\\_QTP2](http://factfinder2.census.gov/faces/tableservices/jsf/pages/productview.xhtml?pid=DEC_10_SF1_QTP2).
  19. Statistics Canada. Population centre 2012 [Available from: <http://www12.statcan.gc.ca/census-recensement/2011/ref/dict/geo049a-eng.cfm>.
  20. United States Census Bureau. QuickFacts: California 2010 [Available from: <http://www.census.gov/quickfacts/table/AGE275210/06>.
  21. Statistics Canada. Annual population estimates by age group and sex at July 1, provincial perspective — Ontario 2010 [Available from: <http://www.statcan.gc.ca/pub/91-215-x/2012000/t518-eng.htm>.
  22. Pihoker C, Forsander G, Wolfsdorf J, Klingensmith GJ. The delivery of ambulatory diabetes care to children and adolescents with diabetes. *Pediatr Diabetes*. 2009;10 Suppl 12:58-70.
  23. Chiang JL, Kirkman MS, Laffel LM, Peters AL, Type 1 Diabetes Sourcebook A. Type 1 diabetes through the life span: a position statement of the American Diabetes Association. *Diabetes Care*. 2014;37(7):2034-54.
  24. Provincial Council for Maternal and Child Health. Ontario Paediatric Diabetes Network Current State Survey Report. 2013.
  25. Mustard CA, Derksen S, Berthelot JM, Wolfson M. Assessing ecologic proxies for household income: a comparison of household and neighbourhood level income measures in the study of population health status. *Health Place*. 1999;5(2):157-71.
  26. US Department of Health and Human Services. THE 2009 HHS POVERTY GUIDELINES 2009 [Available from: <http://aspe.hhs.gov/poverty/09poverty.shtml>.
  27. Center for Medicaid and CHIP Services. State Medicaid and CHIP Income Eligibility Standards [Available from: <http://www.medicaid.gov/AffordableCareAct/Medicaid-Moving-Forward-2014/Downloads/Medicaid-and-CHIP-Eligibility-Levels-Table.pdf>.
  28. Hadden L, Zdeb M. . ZIP Code 411: A Well-Kept SAS® Secret [Available from: <http://www2.sas.com/proceedings/sugi31/143-31.pdf>.
  29. United States Department of Agriculture Economic Research Service. Rural-Urban Continuum Codes 2013 [Available from: <http://www.ers.usda.gov/data-products/rural-urban-continuum-codes.aspx#.U0>.
  30. Agency for Healthcare Research and Quality. Diabetes Short-Term Complications Admission Rate Technical Specifications. 2013.
  31. Amed S, Nuernberger K, McCrea P, Reimer K, Krueger H, Aydede SK, et al. Adherence to clinical practice guidelines in the management of children, youth, and young adults with type 1 diabetes--a prospective population cohort study. *J Pediatr*. 2013;163(2):543-8.
  32. American Diabetes Association. Standards of medical care in diabetes--2014. *Diabetes Care*. 2014;37 Suppl 1:S14-80.
  33. Candian Diabetes Association. 2008 Clinical Practice Guidelines for the Prevention and Management of Diabetes in Canada. . *Can J Diabetes* 2008;32:S150-67.

1  
2  
3  
4  
5  
6  
7  
8  
9  
10  
11  
12  
13  
14  
15  
16  
17  
18  
19  
20  
21  
22  
23  
24  
25  
26  
27  
28  
29  
30  
31  
32  
33  
34  
35  
36  
37  
38  
39  
40  
41  
42  
43  
44  
45  
46  
47  
48  
49  
50  
51  
52  
53  
54  
55  
56  
57  
58  
59  
60

1 34. Lee JM, Davis MM, Menon RK, Freed GL. Geographic distribution of childhood diabetes and  
2 obesity relative to the supply of pediatric endocrinologists in the United States.[Erratum appears in J  
3 Pediatr. 2008 Jun;152(6):893]. J Pediatr. 2008;152(3):331-6.  
4 35. Statistics Canada. Ethnic Diversity and Immigration 2012 [Available from:  
5 <http://www.statcan.gc.ca/pub/11-402-x/2012000/chap/imm/imm-eng.htm?fpv=30000>.  
6 36. Statistics Canada. Population by Year, by Province and Territory 2014 [Available from:  
7 <http://www.statcan.gc.ca/tables-tableaux/sum-som/l01/cst01/demo02a-eng.htm>.  
8 37. Pew Research Center. 15 States with the Highest Share of Immigrants in Their Population 2014  
9 [Available from: <http://www.pewresearch.org/fact-tank/2014/05/14/15-states-with-the-highest-share-of-immigrants-in-their-population/>.  
10 38. Employment and Social Development Canada. Financial Security- Income Distribution 2015  
11 [Available from: <http://www4.hrsdc.gc.ca/.3ndic.1t.4r@-eng.jsp?iid=22>.  
12 39. Kozyrskyj AL, Dahl ME, Chateau DG, Mazowita GB, Klassen TP, Law BJ. Evidence-based  
13 prescribing of antibiotics for children: role of socioeconomic status and physician characteristics. CMAJ.  
14 2004;171(2):139-45.  
15 40. Wang C, Guttman A, To T, Dick PT. Neighborhood income and health outcomes in infants:  
16 how do those with complex chronic conditions fare? Arch Pediatr Adolesc Med. 2009;163(7):608-15.  
17 41. Amed S, Dean HJ, Panagiotopoulos C, Sellers EA, Hadjiyannakis S, Laubscher TA, et al. Type 2  
18 diabetes, medication-induced diabetes, and monogenic diabetes in Canadian children: a prospective  
19 national surveillance study. Diabetes Care. 2010;33(4):786-91.  
20

Confidential

1  
2  
3 1  
4  
5  
6  
7 2  
8  
9  
10 3  
11  
12  
13 4  
14  
15  
16 5 **Figure 1. Age-Standardized Diabetes Mellitus Complication Hospitalization Rates by Sex,**  
17  
18 **Children from Low-Income Families in California (California Children’s Services) and**  
19 **Ontario (Ontario Drug Benefit Program)**  
20  
21 7

22  
23  
24 8 **Figure 1.** Diabetes Mellitus Complication Hospitalization Rates were clinically comparable for  
25  
26 9 children from low-income families in Ontario compared to California (Absolute Differences  
27  
28 10 0.02[95% Confidence Interval: 0.02-0.02]/patient-year for males and 0.03[95% Confidence  
29  
30 11 Interval: 0.03-0.03]/patient-year for females), CCS: California Children’s Services, ODBP:  
31  
32 12 Ontario Drug Benefit Program  
33  
34  
35  
36  
37 13  
38  
39  
40 14  
41  
42  
43 15  
44  
45  
46 16  
47  
48  
49  
50 17  
51  
52  
53 18  
54  
55  
56 19  
57  
58  
59  
60

**Table 1. Characteristics of Children with Diabetes Mellitus from Low-income Families in Ontario (Ontario Drug Benefit Program) and California (California Children's Services)**

| Characteristic                                    | California CCS <sup>a</sup><br>(N=4,922) | Ontario<br>ODBP <sup>b</sup><br>(N=2,050) | p-value <sup>c</sup><br>(CCS vs<br>ODBP) |
|---------------------------------------------------|------------------------------------------|-------------------------------------------|------------------------------------------|
| <b>Male, n (%)</b>                                | 2,265 (46.0)                             | 1,077 (52.5)                              | <b>&lt;0.001</b>                         |
| <b>Age</b>                                        |                                          |                                           |                                          |
| <i>mean (SD), years</i>                           | 10.8 (3.9)                               | 10.5 (4.1)                                | <b>0.004</b>                             |
| <i>median (IQR), years</i>                        | 11 (8-14)                                | 11 (8-14)                                 |                                          |
| <b>Income Quintile, n (%)<sup>d</sup></b>         |                                          |                                           |                                          |
| 5 (high)                                          |                                          | 273 (13.3)                                |                                          |
| 4                                                 |                                          | 339 (16.5)                                |                                          |
| 3                                                 |                                          | 360 (17.6)                                |                                          |
| 2                                                 |                                          | 431 (21.0)                                |                                          |
| 1 (low)                                           |                                          | 637 (31.1)                                |                                          |
| Missing                                           |                                          | 10 (0.5)                                  |                                          |
| <b>Type of Insurance, n (%)<sup>e</sup></b>       |                                          |                                           |                                          |
| Medicaid                                          | 2,511 (51.1)                             |                                           |                                          |
| Healthy Families                                  | 350 (7.1)                                |                                           |                                          |
| CCS-only                                          | 88 (1.8)                                 |                                           |                                          |
| Mixed <sup>f</sup>                                | 1,973 (40.1)                             |                                           |                                          |
| <b>Race, n (%)<sup>e</sup></b>                    |                                          |                                           |                                          |
| White                                             | 1,396 (28.4)                             |                                           |                                          |
| Black                                             | 444 (9.0)                                |                                           |                                          |
| Hispanic                                          | 2,288 (46.5)                             |                                           |                                          |
| Native American                                   | 20 (0.4)                                 |                                           |                                          |
| Asian/Pacific Islander                            | 190 (3.9)                                |                                           |                                          |
| Other                                             | 471 (9.5)                                |                                           |                                          |
| Unknown                                           | 113 (2.3)                                |                                           |                                          |
| <b>Insulin Pump, n (%)</b>                        | 1,124 (22.8)                             | 336 (16.4)                                | <b>&lt;0.001</b>                         |
| <b>DM<sup>g</sup> Care Provider Type, n (%)</b>   |                                          |                                           |                                          |
| Pediatric Endocrinologist                         | 3,144 (63.9)                             | 551 (26.9)                                | Reference                                |
| Pediatrician                                      | 676 (13.7)                               | 971 (47.4)                                | <b>&lt;0.001</b>                         |
| Adult Endocrinologist                             | 32 (0.7)                                 | 81 (4.0)                                  | <b>&lt;0.001</b>                         |
| Family Physician                                  | 74 (1.5)                                 | 172 (8.4)                                 | <b>&lt;0.001</b>                         |
| Internal Medicine                                 | 8 (0.2)                                  | 24 (1.2)                                  | <b>&lt;0.001</b>                         |
| Unknown                                           | 627 (12.7)                               | 200 (9.8)                                 | -                                        |
| Other                                             | 341 (6.9)                                | 51 (2.5)                                  | -                                        |
| <b>Distance to Nearest DM<sup>g</sup> Center,</b> |                                          |                                           |                                          |
| <i>mean (SD), km</i>                              | 46.2 (53.6)                              | 16.5 (23.8)                               | <b>&lt;0.001</b>                         |
| <i>median (IQR), km</i>                           | 25.6 (12.2-59.9)                         | 8 (4-20)                                  |                                          |

| <i>Location, n (%)</i> |             |              |        |
|------------------------|-------------|--------------|--------|
| Rural                  | 155 (3.2)   | 273 (13.3)   | <0.001 |
| Urban                  | 4767 (96.9) | 1,775 (86.6) |        |

<sup>a</sup> California Children's Services, <sup>b</sup> Ontario Drug Benefit Program, <sup>c</sup> Determined using Chi-square test for categorical variables and Student's t-test for continuous variables, <sup>d</sup> Only calculated for Ontario children, <sup>e</sup> Only calculated for California CCS children, <sup>f</sup> Children who switched insurance status during the time period, <sup>g</sup> Diabetes Mellitus

**Table 2. Comparison of Other Healthcare Utilization of Children with Diabetes Mellitus from low-income families in California (California Children's Services) and Ontario (Ontario Drug Benefit Program)**

| Type of Visit                                                                  | Jurisdiction                             |                                        |                                       |
|--------------------------------------------------------------------------------|------------------------------------------|----------------------------------------|---------------------------------------|
|                                                                                | California CCS <sup>a</sup><br>(N=4,922) | Ontario ODBP <sup>b</sup><br>(N=2,050) | p-value <sup>c</sup><br>(CCS vs ODBP) |
| <b>DM<sup>d</sup>-Routine Visits</b>                                           |                                          |                                        |                                       |
| Proportion with $\geq 2$ visits per person-year, n (%)                         | 3,185 (64.7)                             | 1552 (75.7)                            | <0.001                                |
| Visits per Patient-Year, mean (95% CI)                                         | 2.85 (2.80-2.90)                         | 3.40 (3.35-3.45)                       | <0.001                                |
| <b>Other Hospitalizations</b>                                                  |                                          |                                        |                                       |
| Hospitalizations per Patient-Year, mean (95% CI)                               | 0.11 (0.11-0.09)                         | 0.12 (0.11-0.13)                       | 0.052                                 |
| <b>DM<sup>d</sup>-Complication Emergency Department Visit Rate<sup>e</sup></b> |                                          |                                        |                                       |
| Visits per Patient-Year, mean (95% CI)                                         | 0.03 (0.02-0.03)                         | 0.03 (0.03-0.04)                       | 1.0                                   |

<sup>a</sup> California Children's Services, <sup>b</sup> Ontario Drug Benefit Program, <sup>c</sup> Determined using Chi-square test for proportion with  $>2$  DM-routine visits, Student's t-test for visit/hospitalization rates per patient-year, <sup>d</sup> Diabetes Mellitus, <sup>e</sup> Excludes visits that end in hospital admission

1  
2  
3 1  
4  
5  
6  
7 2  
8  
9  
10 3  
11  
12 **Table 3. Comparison of Children with Diabetes Mellitus from Low-income Families**  
13 **(Ontario Drug Benefit Program) to All Other Children within Ontario**  
14

|                                                                      | Ontario ODBP <sup>a</sup><br>(N=2,050) | Other Ontario<br>(N=6,120) | p-value <sup>b</sup> |
|----------------------------------------------------------------------|----------------------------------------|----------------------------|----------------------|
| <b>Patient Characteristics</b>                                       |                                        |                            |                      |
| <b>Male, n (%)</b>                                                   | 1,077 (52.5)                           | 3,200 (52.3)               | 0.84                 |
| <b>Age</b>                                                           |                                        |                            |                      |
| <i>mean (SD), years</i>                                              | 10.5 (4.1)                             | 11.1 (4.0)                 | <0.001               |
| <i>median (IQR), years</i>                                           | 11 (8-14)                              | 12 (9-14)                  |                      |
| <b>Income Quintile, n (%)</b>                                        |                                        |                            |                      |
| 5 (high)                                                             | 273 (13.3)                             | 1,498 (24.5)               | Reference            |
| 4                                                                    | 339 (16.5)                             | 1,400 (22.9)               | <b>0.002</b>         |
| 3                                                                    | 360 (17.6)                             | 1,262 (20.6)               | <0.001               |
| 2                                                                    | 431 (21.0)                             | 1,058 (17.3)               | <0.001               |
| 1 (low)                                                              | 637 (31.1)                             | 830 (13.6)                 | <0.001               |
| Missing                                                              | 10 (0.5)                               | 72 (1.2)                   | -                    |
| <b>Insulin Pump, n (%)</b>                                           | 336 (16.4)                             | 1,441 (23.5)               | <0.001               |
| <b>DM<sup>c</sup> Care Provider Type, n (%)</b>                      |                                        |                            |                      |
| Pediatric Endocrinologist                                            | 551 (26.9)                             | 1,473 (24.1)               | Reference            |
| Pediatrician                                                         | 971 (47.4)                             | 2,685 (43.9)               | 0.58                 |
| Adult Endocrinologist                                                | 81 (4.0)                               | 243 (4.0)                  | 0.40                 |
| Family Physician                                                     | 172 (8.4)                              | 526 (8.6)                  | 0.18                 |
| Internal Medicine                                                    | 24 (1.2)                               | 105 (1.7)                  | <b>0.03</b>          |
| Unknown                                                              | 200 (9.8)                              | 1,013 (16.6)               | -                    |
| <b>Distance to Nearest DM<sup>c</sup> Center,</b>                    |                                        |                            |                      |
| <i>mean (SD), km</i>                                                 | 16.5 (23.8)                            | 24.4 (102.8)               | <0.001               |
| <i>median (IQR), km</i>                                              | 8 (4-20)                               | 9 (5-20)                   |                      |
| <b>Location, n (%)</b>                                               |                                        |                            |                      |
| Rural                                                                | 273 (13.3)                             | 818 (13.4)                 | 0.89                 |
| Urban                                                                | 1,775 (86.6)                           | 5,263 (86.0)               |                      |
| <b>Health Care Utilization</b>                                       |                                        |                            |                      |
|                                                                      | Ontario ODBP <sup>a</sup><br>(N=2,192) | Other Ontario<br>(N=6,120) | p-value <sup>d</sup> |
| <b>Age-Standardized DM<sup>c</sup>-Complication Hospitalizations</b> |                                        |                            |                      |
| Males, Hospitalizations per Patient-Year, mean (CI)                  | 0.06 (0.05-0.07)                       | 0.02 (0.02-0.03)           | <0.001               |
| Females, Hospitalizations per Patient-Year, mean (CI)                | 0.08 (0.07-0.09)                       | 0.03 (0.03-0.04)           | <0.001               |
| <b>Other Hospitalizations</b>                                        |                                        |                            |                      |
| Hospitalizations per Patient-Year, mean (CI)                         | 0.12 (0.11-0.13)                       | 0.05 (0.05-0.05)           | <0.001               |
| <b>DM<sup>c</sup>-Routine Visits</b>                                 |                                        |                            |                      |
| Proportion with ≥2 visits per person-year, n (%)                     | 1,552 (75.7)                           | 4,345 (71.0)               | <0.001               |
| Visits per Patient-Year, mean (CI)                                   | 3.40 (3.35-3.45)                       | 3.18 (3.15-3.21)           | <0.001               |
| <b>DM<sup>c</sup>-Complication Emergency Department Visit Rate</b>   |                                        |                            |                      |
| Visits per Patient-Year, mean (CI)                                   | 0.03 (0.03-0.04)                       | 0.02 (0.02-0.02)           | <0.001               |



1  
2  
3  
4  
5  
6  
7  
8  
9  
10  
11  
12  
13  
14  
15  
16  
17  
18  
19  
20  
21  
22  
23  
24  
25  
26  
27  
28  
29  
30  
31  
32  
33  
34  
35  
36  
37  
38  
39  
40  
41  
42  
43  
44  
45  
46  
47  
48  
49  
50  
51  
52  
53  
54  
55  
56  
57  
58  
59  
60

1   <sup>a</sup> Ontario Drug Benefit Program, <sup>b</sup> Determined using Chi-square test for categorical variables and Student's t-test for  
2   continuous variables, <sup>c</sup> Diabetes Mellitus, <sup>d</sup> Determined using Chi-square test for proportion with >2 DM-routine  
3   visits, Student's t-test for visit/hospitalization rates per patient-year

4

Confidential

**Health care for children with diabetes mellitus in low-income families:  
a population-based cohort study of health systems in Ontario and California**

Sunitha V. Kaiser, MD MSc,<sup>a</sup> Vandana Sundaram, MPH,<sup>b</sup> Eyal Cohen, MD MSc,<sup>c,d</sup>  
Rayzel Shulman, MD PhD,<sup>d,e</sup> Jun Guan MSc,<sup>d</sup> Lee Sanders, MD MPH,<sup>\*b,f</sup> Astrid Guttman,  
MDCM MSc<sup>\*c,d</sup>

**Affiliations:**

<sup>a</sup>Department of Paediatrics, University of California San Francisco, 550 16th Street, Box 0110,  
San Francisco, CA 94158

<sup>b</sup>Centre for Policy, Outcomes and Prevention, Stanford University, 300 Pasteur Drive, Room  
H310, Palo Alto, CA 94305

<sup>c</sup>Division of Paediatric Medicine, Department of Paediatrics, Hospital for Sick Children and the  
University of Toronto, 555 University Avenue, Toronto, ON M5G 1X8, Canada

<sup>d</sup>Institute for Clinical Evaluative Sciences, 2075 Bayview Ave., G-Wing, Toronto, Ontario M4N  
3M5, Canada

<sup>e</sup>Division of Endocrinology, Department of Paediatrics, Hospital for Sick Children and the  
University of Toronto, 555 University Avenue, Toronto, ON M5G 1X8, Canada

<sup>f</sup>Division of General Pediatrics, Stanford University, 300 Pasteur Drive, Room H310, Palo Alto,  
CA 94305

\*equal contribution as senior authors

**Corresponding Author:** Dr. Astrid Guttman (astrid.guttman@ices.on.ca)

Confidential

1  
2  
3 **Abstract**  
4

5  
6 **Background:** Children with diabetes mellitus in low-income families have poor outcomes, but  
7  
8 little is known about how this relates to healthcare system structure. Our objective was to gain  
9  
10 insight into how best to structure health systems to serve these children by describing their  
11  
12 healthcare utilization in two varying health system models: 1) Canadian model with an organized  
13  
14 diabetes care network including generalists, 2) US model with targeted support services for  
15  
16 children from low-income families.  
17  
18  
19

20  
21 **Methods:** Population-based retrospective cohort study of children 1-17 years with type 1  
22  
23 diabetes mellitus between 2009-2012 in the California Children's Services program and Ontario  
24  
25 using administrative data. Ontario Drug Benefit Program enrolment used to identify children  
26  
27 from low-income families. Proportions of children receiving  $\geq 2$  diabetes routine visits/year  
28  
29 compared using Chi-square tests and diabetes-complication hospitalization rates compared using  
30  
31 direct standardization.  
32  
33  
34  
35

36  
37 **Results:** More California children from low-income families (n=4922) received diabetes routine  
38  
39 care from paediatric endocrinologists (63.9% versus 26.9%, p<0.001) and used insulin pumps  
40  
41 (22.8% versus 16.4%, p<0.001) compared to Ontario children (n=2050). California children from  
42  
43 low-income families were less likely to receive  $\geq 2$  diabetes routine visits/year compared to  
44  
45 Ontario children (64.7% versus 75.7%, p<0.001), but had clinically comparable diabetes-  
46  
47 complication hospitalization rates (Absolute Differences 0.02 [95% Confidence Interval 0.02-  
48  
49 0.02] for males and 0.03 [0.03-0.03] hospitalizations/patient-year for females).  
50  
51  
52

53  
54 **Interpretation:** Ontario children from low-income families received more diabetes routine care  
55  
56 compared to California children from low-income families and had clinically comparable rates of  
57  
58  
59  
60

1  
2  
3  
4  
5  
6  
7  
8  
9  
10  
11  
12  
13  
14  
15  
16  
17  
18  
19  
20  
21  
22  
23  
24  
25  
26  
27  
28  
29  
30  
31  
32  
33  
34  
35  
36  
37  
38  
39  
40  
41  
42  
43  
44  
45  
46  
47  
48  
49  
50  
51  
52  
53  
54  
55  
56  
57  
58  
59  
60

1 diabetes-complication hospitalizations. Diabetes care networks that integrate generalists may  
2 play a role in improving access and outcomes for the growing population of children with  
3 diabetes.

Confidential

1  
2  
3 **Background:**  
4

5           The prevalence of type 1 diabetes mellitus in children has been rapidly growing; between  
6  
7 2001-2009, it rose 22% in the United States (from 1.5 to 1.9 per 1000)(1) and 34% in Canada  
8  
9 (from 2.0 to 3.0 per 1000) among children age  $\leq 19$  years.(2) Children with diabetes mellitus  
10  
11 suffer severe morbidity and three-fold increased mortality,(3) primarily due to acute, potentially  
12  
13 preventable complications(4) (e.g. diabetic ketoacidosis). Children from low-income families are  
14  
15 at highest risk-- they have poorer disease control, higher rates of life-threatening complications,  
16  
17 and worse outcomes.(5-7) It is unknown how different health system models affect health care  
18  
19 delivery and outcomes for children with diabetes mellitus.  
20  
21  
22  
23

24           In Ontario, Canada, legal residents have universal access to health care and children with  
25  
26 diabetes mellitus receive care from a network of specialized centres that integrate generalists.  
27  
28 Since health insurance is universal, few programs specifically target support to children from  
29  
30 low-income families. In contrast, in the United States, care for children with diabetes mellitus is  
31  
32 covered by a variety of health-insurance payers (e.g., public, commercial, managed-care), as well  
33  
34 as a variety of care-system structures (e.g., independent medical providers, health-management  
35  
36 organizations). Federal funds (from Title V of the Social Security Act) enable programs such as  
37  
38 California Children's Services to target supports for children from low-income families who  
39  
40 suffer from chronic diseases, including diabetes mellitus.(8) The primary aim of this study was to  
41  
42 gain insight into how best to structure health care systems to meet the needs of children with  
43  
44 diabetes mellitus in low-income families by describing their demographics and health care  
45  
46 utilization patterns in these two varying health system models. The secondary aim of this study  
47  
48 was to examine outcomes across socioeconomic status within Ontario to better contextualize our  
49  
50 findings.  
51  
52  
53  
54  
55  
56  
57  
58  
59  
60

1  
2  
3 **1 Methods:**  
4

5  
6 2

7  
8 **3 *Data Source and Study Design:***  
9

10 We performed a retrospective cohort analysis using well-validated population-based  
11 administrative health databases from California Children's Services(9) and Ontario(10, 11).  
12  
13 California Children's Services database contains demographics and information on all paid  
14  
15 hospital, emergency department, and outpatient visits for enrollees. This database has not been  
16  
17  
18 not formally validated, but has been used in previous studies of children with diabetes.(9, 12) We  
19  
20 used the 2006 Canadian Census to assign neighbourhood income quintile. Ontario databases are  
21  
22  
23 linked via unique encoded individual identifiers. These included:  
24  
25

26  
27 - Ontario Diabetes Database, a validated population-based database of all Ontario  
28  
29 residents with diabetes mellitus(13, 14)  
30

31 - Registered Persons Database (demographics)  
32

33  
34 - Ontario Health Insurance Plan Database (physician billing claims), from which diabetes  
35  
36 diagnoses codes have been used in validation studies(13, 14)  
37

38 - Ontario Drug Benefit Program Database  
39

40  
41 - Hospital Discharge Abstract Database, for which a diabetes diagnosis was found to be  
42  
43 accurate in 94.5% of charts included in a large re-abstraction study(15)  
44

45  
46 - National Ambulatory Care Registry (emergency department information) with 84%  
47  
48 overall inter-rater reliability of diagnosis information(16)  
49

50  
51 - Physician Database  
52  
53  
54  
55  
56  
57  
58  
59  
60

1 - Assistive Devices Program database, which although not formally validated, has  
2 prevalence of insulin pump use in children that matches prospectively collected data on  
3 this population(17)

4  
5 ***Study Population/Setting:***

6 We included all children ages 1-17 years with diabetes mellitus from 2009-2012 enrolled  
7 in the California Children's Services program or residing in Ontario. We identified children in  
8 the California Children's Services program with diabetes mellitus by identifying children with  
9 the International Classification of Diseases, Ninth Revision, Clinical Modification code 250  
10 (diabetes mellitus) listed as the eligible diagnosis code and with at least one insulin claim  
11 **[Appendix 1]**.(12) In Ontario, we used the Ontario Diabetes Database (13) and divided children  
12 into two cohorts: 1) those with Ontario Drug Benefit Program claims (children from low-income  
13 families) and 2) all other children. We restricted all cohorts to children enrolled in healthcare  
14 for  $\geq 365$  consecutive days. For the main two cohorts, California Children's Services and Ontario  
15 Drug Benefit Program, we restricted to those with type 1 diabetes mellitus by excluding all  
16 children using oral hypoglycaemics (used primarily in type 2 diabetes mellitus) using drug  
17 identification numbers (children in Ontario Drug Benefit Program) and national drug codes  
18 (children in California Children's Services) **[Appendix 1]**.

19 California and Ontario are the most populous state and province in the United States and  
20 Canada, respectively.(18, 19) In 2010, children <18 years represented 25% of the California  
21 population, and children <20 years represented 23% of the Ontario population.(20, 21)  
22 California Children's Services supports care for children from low-income families with certain  
23 chronic diseases, including diabetes mellitus.(8) The program sets resource and care

1 standards(22, 23) for the multidisciplinary care of children with diabetes mellitus at California  
2 Children's Services approved clinics, and can provide supplemental funding for clinics to meet  
3 these standards. California Children's Services also provides supplemental coverage for medical  
4 devices (e.g. glucometers, lancets) and case-management support (public health insurance  
5 enrolment, accessing care through California Children's Services approved centres, securing  
6 transportation, monitoring adherence).

7 In Ontario, every legal resident has access to universal government insurance that covers  
8 all medically necessary healthcare services except prescription drugs. Drug costs are handled out  
9 of pocket, with private extended health benefits, or through the Ontario Drug Benefit Program  
10 (covers those >65 years and those who receive social assistance). Medical care for children with  
11 diabetes mellitus in Ontario is provided by the Ontario Paediatric Diabetes Network, which  
12 consists of specialized paediatric diabetes centres (thirty secondary-level and five tertiary-level).  
13 These centres have multidisciplinary core teams consisting of nurses, dieticians, and social  
14 workers that work closely with paediatricians, and/or paediatric endocrinologists, and/or family  
15 physicians to provide comprehensive care.(24)

### 17 ***Patient Characteristics:***

18 Socioeconomic status for children in Ontario was described using Ontario Drug Benefit  
19 Program enrolment and neighbourhood income quintile at the level of the dissemination area  
20 (representing a population of ≈400-700 individuals) adjusted for household and community  
21 size.(25) Children were eligible for Ontario Drug Benefit Program if expected prescription costs  
22 were >4% of household income, or if their families were receiving social assistance. Children  
23 were eligible for California Children's Services if medical expenses were >20% of household



1 income(8) or if household income was <250% of the federal poverty line (annual household  
2 income <\$22,050 in 2009)(26). For children in California Children’s Services, race and primary  
3 insurance were used to describe SES. During the study period, children in California qualified  
4 for Medicaid if household income was <100-133% of federal poverty level.(27)

5 We identified insulin pump utilization using the Assistive Devices Program database  
6 (Ontario), and billing claims for insulin pumps or pump batteries (California Children’s Services)  
7 [Appendix 1]. We determined specialty of diabetes care provider by identifying the physician  
8 providing the majority of outpatient diabetes care (diagnosis code 250.xx), then using the  
9 physician database (Ontario) and the National Provider Identifier (California Children’s  
10 Services). Distance from nearest diabetes centre was determined using home postal code.(28)  
11 We defined urban location in California using the United States Department of Agriculture  
12 definition (county population of  $\geq 250,000$ )(29) and in Ontario using the Statistics Canada  
13 definition ( $\geq 400$  persons per square kilometre).(19) Any missing data were described.

### 14 15 ***Outcome Measures:***

16 We determined diabetes mellitus complication hospitalization rates using the Agency for  
17 Healthcare Research and Quality specifications (primary diagnoses: diabetic ketoacidosis,  
18 diabetes with hyperosmolarity, diabetes with coma, or uncontrolled diabetes).(30) ICD-9-CM  
19 codes were translated to ICD-10 for Ontario [Appendix 1]. We excluded hospitalizations for  
20 therapy initiation, defined as those within 30 days of diabetes mellitus diagnosis (Ontario) or  
21 California Children’s Services enrolment (California). We determined the proportion of children  
22 receiving  $\geq 2$ / outpatient diabetes routine visits per year [Appendix 1](31-33), rates of diabetes  
23 mellitus complication emergency department visits not resulting in hospitalizations (using the

1  
2  
3 1 same codes as for diabetes mellitus complication hospitalizations), and rates of all other  
4  
5  
6 2 hospitalizations (to explore whether there may be different admission thresholds across  
7  
8 3 jurisdictions).

9  
10  
11 4  
12  
13  
14 5 ***Analysis:***

15  
16 6 We did separate but parallel analyses on both cohorts, as privacy legislation does not  
17  
18 7 allow data from the two jurisdictions to be merged. We compared characteristics of children in  
19  
20 8 our low-income cohorts (California Children’s Services and Ontario Drug Benefit Program)  
21  
22 9 using  $\chi^2$  tests for categorical variables and Student’s t-tests for continuous variables. In order to  
23  
24 10 compare diabetes mellitus complication hospitalization rates per person-year, we used direct  
25  
26 11 standardisation to control for differences in age distribution and stratified by sex (standardised to  
27  
28 12 2010 California age distribution(18)). We then calculated absolute differences of rates with 95%  
29  
30 13 confidence intervals. We compared proportions of children receiving  $\geq 2$  diabetes mellitus routine  
31  
32 14 visits/year using  $\chi^2$  tests. We also compared characteristics and health care utilization within  
33  
34 15 Ontario, comparing children from low-income families to all other Ontario children. We also  
35  
36 16 performed a sensitivity analyses including only children using insulin pumps (to explore if rates  
37  
38 17 differed by pump use).

39  
40  
41  
42  
43  
44  
45 18 This study was approved by the Hospital for Sick Children (Toronto, Canada),  
46  
47 19 Sunnybrook Health Science Centre (Toronto, Canada), and Stanford University (Palo Alto,  
48  
49 20 United States) research ethics boards. SAS 9.2 (SAS Institute, Cary, NC) was used for analyses.  
50  
51  
52  
53  
54  
55 21

56  
57  
58  
59  
60  
22 **Results:**

Characteristics of children with diabetes mellitus from low-income families in California (California Children's Services) and Ontario (Ontario Drug Benefit Program) are described in **Table 1**. There were 4,922 children from low-income families in California (11,836 patient-years, mean=2.4 years) and 2,050 children from low-income families in Ontario (5,300 patient-years, mean=2.6 years). There was a smaller proportion of male children from low-income families in California ( $p<0.001$ ). A higher proportion children from low-income families in California were on insulin pumps compared to Ontario (22.8% versus 16.4%,  $p<0.001$ ). Over twice as many children from low-income families in California had diabetes mellitus care by paediatric endocrinologists compared to Ontario (63.9% versus 26.9%,  $p<0.001$ ).

Age-standardized diabetes mellitus complication hospitalization rates are presented in **Figure 1**. Children from low-income families in Ontario had clinically comparable rates to children in California (0.06 versus 0.08 hospitalizations/patient-year for males and 0.08 versus 0.11 hospitalizations/patient-year for females, Absolute Differences 0.02 [95% Confidence Interval (CI): 0.02-0.02]) for males and 0.03 [95% CI 0.03-0.03] for females.

**Table 2** shows a higher proportion of children from low-income families in Ontario received  $\geq 2$  diabetes routine visits per year compared to children in California (75.7% versus 64.7%,  $p<0.001$ ). Children from low-income families in Ontario had an equal rate of diabetes mellitus complication emergency department visit rates to children in California (0.03 visits/patient-year,  $p=1$ ). We found no differences in rates of other hospitalizations.

***Ontario Children from Low-Income Families Compared to All Other Ontario Children with Diabetes Mellitus***

1  
2  
3  
4 1 A lower proportion of Ontario children from low-income families (Ontario Drug Benefit  
5  
6 2 Program) were on insulin pumps compared to other Ontario children (16.4% versus 23.5%,  
7  
8 3  $p < 0.001$ ) [Table 3]. Children from low-income families in Ontario had higher diabetes mellitus  
9  
10 4 complication hospitalization rates compared to all other Ontario children with diabetes mellitus  
11  
12 5 (0.06 versus 0.02 hospitalizations/patient-year for males and 0.08 versus 0.03  
13  
14 6 hospitalizations/patient-year for females, Absolute Differences 0.04 [0.04-0.04] and 0.05 [0.05-  
15  
16 7 0.05]). However, a slightly higher proportion of children from low-income families in Ontario  
17  
18 8 received  $\geq 2$  diabetes routine visits per year (75.7% versus 71.0%,  $p < 0.001$ ).  
19  
20  
21  
22  
23  
24  
25  
26  
27  
28  
29  
30  
31  
32  
33  
34  
35  
36  
37  
38  
39  
40  
41  
42  
43  
44  
45  
46  
47  
48  
49  
50  
51  
52  
53  
54  
55  
56  
57  
58  
59  
60

### 10 ***Comparisons in Insulin Pump Users***

11  
12 Among children from low-income families in California, age-sex standardized diabetes  
13  
14 mellitus complication hospitalization rates were lower for children on versus off insulin pumps  
15  
16 (0.07 [0.06-0.08] versus 0.09 [0.09-0.10] hospitalizations/patient-year, Absolute Difference 0.02  
17  
18 [95% CI 0.02-0.02]). In children from low-income families in Ontario, there were no  
19  
20 differences by pump status. There were no differences in standardized diabetes mellitus  
21  
22 complication hospitalization rates between children from low-income families in California and  
23  
24 Ontario on pumps.  
25  
26  
27  
28  
29  
30  
31  
32  
33  
34  
35  
36  
37  
38  
39  
40  
41  
42  
43  
44  
45  
46  
47  
48  
49  
50  
51  
52  
53  
54  
55  
56  
57  
58  
59  
60

### 19 **Interpretation:**

20  
21 In this large, population-based cross-national study, we found significant differences in  
22  
23 health care delivery for children with type 1 diabetes mellitus from low-income families. Care  
24  
25 for most children from low-income families in California was provided by paediatric  
26  
27  
28  
29  
30  
31  
32  
33  
34  
35  
36  
37  
38  
39  
40  
41  
42  
43  
44  
45  
46  
47  
48  
49  
50  
51  
52  
53  
54  
55  
56  
57  
58  
59  
60

1  
2  
3 1 endocrinologists, while in Ontario it was provided by general paediatricians. Ontario children  
4  
5 2 from low-income families were more likely to receive diabetes mellitus routine care compared to  
6  
7 3 California children from low-income families, but had clinically comparable rates of diabetes  
8  
9 4 mellitus complication hospitalizations.  
10  
11  
12

13  
14 5 Major structural differences exist in how care is provided in California and Ontario, and  
15  
16 6 these differences may contribute to some of our findings. In Ontario, the Ontario Paediatric  
17  
18 7 Diabetes Network aids generalists in providing diabetes care by linking them to paediatric  
19  
20 8 endocrinologists and multi-disciplinary teams at tertiary centres.(8) In contrast, most physician  
21  
22 9 care in California Children's Services is provided directly by paediatric endocrinologists. Given  
23  
24 10 the higher rates of routine visits and clinically comparable diabetes mellitus complication rates in  
25  
26 11 Ontario, our findings suggest that models of care with generalists practicing within  
27  
28 12 multidisciplinary diabetes settings may be effective. Previous studies comparing care models of  
29  
30 13 subspecialist versus shared-care (generalists and paediatric endocrinologists) for children with  
31  
32 14 diabetes mellitus found no differences in adherence to guideline recommendations or glycaemic  
33  
34 15 control.(5, 31) Shared-care models may help overcome geographic barriers to accessing care,  
35  
36 16 which is important in the context of our findings that children in California Children's Services  
37  
38 17 lived further from the nearest diabetes mellitus centres.(31) Given the rising prevalence of  
39  
40 18 diabetes mellitus, shared-care models may become essential for meeting health care needs of this  
41  
42 19 growing population. A 2008 US study found significant geographic disparities in supply of  
43  
44 20 paediatric endocrinologists. Authors concluded that shared-care models and increased capacity  
45  
46 21 of primary care physicians as medical homes were essential to address the needs of children with  
47  
48 22 diabetes mellitus.(34)  
49  
50  
51  
52  
53  
54  
55  
56  
57  
58  
59  
60

1  
2  
3 1 We found lower complication rates for children from low-income families in California  
4  
5 2 on compared to those not on insulin pumps. Previous Canadian work investigating the  
6  
7 3 relationship between social determinants of health and glycaemic control in children with  
8  
9 4 diabetes mellitus demonstrated that children who were most deprived had poorer glycaemic  
10  
11 5 control and lower rates of pump use; however, pump use had a moderating effect on  
12  
13 6 socioeconomic gradients in glycaemic control.(7) This is in line with our findings in children  
14  
15 7 from low-income families in California. Pump use is higher among children from low-income  
16  
17 8 families in California compared to Ontario, and a significant socioeconomic gradient exists  
18  
19 9 within Ontario. Ontario has eligibility criteria for pump funding, but there are no such guidelines  
20  
21 10 in California. Greater insulin pump use among children from low-income families in California  
22  
23 11 may also be due to greater clinic support (care coordinators), comfort with pump use in high-risk  
24  
25 12 populations, professional detailing by pump manufacturers, or commercial pressures due to a  
26  
27 13 fee-for-service payment system. Ontario covers 100% of pump cost, but only 75% of pump  
28  
29 14 supply costs, which may create a barrier for low-income families. Further research is needed to  
30  
31 15 establish whether pumps can moderate socioeconomic gradients in health outcomes for children  
32  
33 16 with diabetes, and, if so, how best to support access to pumps for children from low-income  
34  
35 17 families.

36  
37  
38  
39  
40  
41  
42  
43  
44 18 In order to gain insight into how best to structure health care systems to meet the needs of  
45  
46 19 children with diabetes mellitus in low-income families, we focused our study to two settings in  
47  
48 20 which we could clearly describe details of how the health systems are structured for readers to  
49  
50 21 understand and contrast. California and Ontario were selected for our analysis to increase the  
51  
52 22 generalizability of our study--they are the most populous state and province in the United States  
53  
54 23 and Canada, respectively, and share highly diverse populations with similar proportions of  
55  
56  
57  
58  
59  
60

1  
2  
3 1 immigrants.(19, 35-37) However, some of the differences we observed in care and outcomes  
4  
5 2 may be due to population differences. The administrative data from both jurisdictions were  
6  
7 3 limited by lack of important information such as direct measures of socio-economic status and  
8  
9 4 glycaemic control. Low household income has been shown to be a strong determinant of health  
10  
11 5 outcomes in children with diabetes mellitus,(5-7) and our findings of higher diabetes mellitus  
12  
13 6 complication hospitalization rates in Ontario children from low-income families compared to all  
14  
15 7 other Ontario children are likely a reflection of the powerful effects of socio-economic factors.  
16  
17 8 California Children’s Services eligibility required an annual household income of <\$22,050 in  
18  
19 9 2009 (or medical expenses >20% of income), and the majority of children in Ontario Drug  
20  
21 10 Benefit Program were in the lowest income quintiles (annual household income ≈\$20,000 for  
22  
23 11 quintile 1 in 2009)(38) indicating comparability to children in California Children’s Services.  
24  
25 12 However, neighbourhood income quintile is a proxy measure of household income. Previous  
26  
27 13 studies have demonstrated good correlation between these data and individual household income  
28  
29 14 in another Canadian province, and this method is widely used in Canadian health services  
30  
31 15 research,(39, 40) but the precision of this ecologic methodology may be more limited in rural  
32  
33 16 areas and by practices such as renting suites in homes. Secondly, for our comparisons of  
34  
35 17 children within Ontario with diabetes mellitus (those from low-income families versus all other  
36  
37 18 children), we were unable to exclude children in “all other” group who were on oral  
38  
39 19 hypoglycaemics, as drug utilization data were only available for children in Ontario Drug Benefit  
40  
41 20 Program. A higher proportion of children with type 2 diabetes mellitus in the “all other” group  
42  
43 21 may contribute to the lower rates of complications compared to children from low-income  
44  
45 22 families (although rates of type 2 diabetes mellitus are very low in Canadian children(17, 41)).  
46  
47 23 Thirdly, we utilized differing strategies for identifying children with diabetes mellitus in  
48  
49  
50  
51  
52  
53  
54  
55  
56  
57  
58  
59  
60

1  
2  
3 1 California Children's Services and Ontario. Our strategies have been used in prior analyses(12,  
4  
5 2 13); however, that used in California Children's Services has not been formally validated, and  
6  
7  
8 3 thus may contribute to differences between the study cohorts. Lastly, we were unable to  
9  
10 4 contextualize our findings in California by comparing outcomes with children from higher  
11  
12 5 income families, as there are no population-based California data for these children. In order to  
13  
14 6 ensure quality and validity of our analysis, we used comparable data sources from each country,  
15  
16 7 created consistent definitions across jurisdictions, compared similar populations during the same  
17  
18 8 time interval, and carefully considered differences across systems that might explain the  
19  
20 9 variation we observed. Nevertheless, this study highlights the challenges of such cross-  
21  
22 10 jurisdictional analysis, as it is impossible to make causal assumptions of the health-system level  
23  
24 11 determinants of the outcomes measured.  
25  
26  
27  
28  
29  
30  
31  
32

### 33 **Conclusions and Implications:**

34  
35  
36 14 Ontario children with diabetes mellitus in low-income families more commonly received  
37  
38 15 diabetes routine care from generalists supported by a diabetes care network. These children were  
39  
40 16 more likely to receive routine care and had clinically comparable diabetes complication  
41  
42 17 hospitalization rates to children for low-income families in California. Developing diabetes  
43  
44 18 networks that integrate generalists may play a role in increasing utilization of routine diabetes  
45  
46 19 care and reducing complications for children. The significant disparities in diabetes mellitus  
47  
48 20 outcomes within the universal access system in Ontario suggest an important research and policy  
49  
50 21 focus to improve observed socioeconomic gradients in health outcomes for this growing  
51  
52 22 population of children.  
53  
54  
55  
56  
57  
58  
59  
60



1  
2  
3 1 **List of Abbreviations:** CI- Confidence Interval  
4  
5  
6

7 2  
8  
9 3 **Competing Interests:**  
10

11 4 The authors declare that they have no competing interests  
12  
13  
14 5

15  
16 6 **Author's Contributions:**  
17

18 7 All authors were involved in the conceptualization and design of the study. VS conducted the  
19  
20 8 California Children's Services analysis, JG the Ontario data analysis. SK interpreted both the  
21  
22 9 Ontario and California analyses and drafted the manuscript. All authors critically revised the  
23  
24 10 manuscript. All authors read and approved the final manuscript and agree to act as guarantors of  
25  
26 11 this work.  
27  
28  
29  
30  
31  
32

33 13 **Acknowledgements:**  
34

35  
36 14 This work was supported in part with funding from the California Health Care Foundation.  
37  
38 15 Astrid Guttmann receives salary support through an Applied Research Chair in Child Health  
39  
40 16 Services Research from the Canadian Institutes of Health Research and operating funding for the  
41  
42 17 Ontario analyses came from this Research Chair and with support from the Institute for Clinical  
43  
44 18 Evaluative Sciences that is funded by an annual grant from the Ontario Ministry of Health and  
45  
46 19 Long-Term Care. The Institute for Clinical Evaluative Sciences is a non-profit organization  
47  
48 20 funded by the Ontario Ministry of Health and Long-Term Care with provision of population-  
49  
50 21 based data. Parts of this paper are based on data compiled by the Canadian Institute for Health  
51  
52 22 Information.  
53  
54  
55  
56  
57  
58  
59  
60

1  
2  
3  
4  
5  
6  
7  
8  
9  
10  
11  
12  
13  
14  
15  
16  
17  
18  
19  
20  
21  
22  
23  
24  
25  
26  
27  
28  
29  
30  
31  
32  
33  
34  
35  
36  
37  
38  
39  
40  
41  
42  
43  
44  
45  
46  
47  
48  
49  
50  
51  
52  
53  
54  
55  
56  
57  
58  
59  
60

1 The opinions, results and conclusions reported in this paper are those of the authors and are  
2 independent from all funding sources. No endorsement by the Centre for Policy, Outcomes and  
3 Prevention, the Institute for Clinical Evaluative Sciences, the Canadian Institute for Health  
4 Information or the Ontario Ministry of Health and Long-Term Care is intended or should be  
5 inferred.

6  
7  
8  
9  
10  
11  
12  
13  
14  
15  
16  
17  
18  
19  
20  
21  
22  
23  
24  
25  
26  
27  
28  
29  
30  
31  
32  
33  
34  
35  
36  
37  
38  
39  
40  
41  
42  
43  
44  
45  
46  
47  
48  
49  
50  
51  
52  
53  
54  
55  
56  
57  
58  
59  
60

## 1 **References:**

- 2 1. Dabelea D, Mayer-Davis EJ, Saydah S, Imperatore G, Linder B, Divers J, et al. Prevalence of  
3 type 1 and type 2 diabetes among children and adolescents from 2001 to 2009. *Jama*. 2014;311(17):1778-  
4 86.
- 5 2. Public Health Agency of Canada.. Diabetes in Canada: Highlights from the National Diabetes  
6 Surveillance System [Available from: [http://www.phac-aspc.gc.ca/publicat/2008/dicndss-dacsnsd-04-  
7 05/index-eng.php](http://www.phac-aspc.gc.ca/publicat/2008/dicndss-dacsnsd-04-05/index-eng.php).
- 8 3. O'Grady MJ, Delaney J, Jones TW, Davis EA. Standardised mortality is increased three-fold in a  
9 population-based sample of children and adolescents with type 1 diabetes. *Pediatr Diabetes*.  
10 2013;14(1):13-7.
- 11 4. Edge JA, Ford-Adams ME, Dunger DB. Causes of death in children with insulin dependent  
12 diabetes 1990-96. *Arch Dis Child*. 1999;81(4):318-23.
- 13 5. Hatherly K, Smith L, Overland J, Johnston C, Brown-Singh L, Waller D, et al. Glycemic control  
14 and type 1 diabetes: the differential impact of model of care and income. *Pediatr Diabetes*.  
15 2011;12(2):115-9.
- 16 6. Shi L, Lu N. Individual sociodemographic characteristics associated with hospitalization for  
17 pediatric ambulatory care sensitive conditions. *J Health Care Poor Underserved*. 2000;11(4):373-84.
- 18 7. Zuijdwijk CS, Cuerden M, Mahmud FH. Social determinants of health on glycemic control in  
19 pediatric type 1 diabetes. *J Pediatr*. 2013;162(4):730-5.
- 20 8. California Department of Health Care Services. California Children's Services: Program  
21 Overview 2014 [Available from: <http://www.dhcs.ca.gov/services/ccs/Pages/ProgramOverview.aspx>.
- 22 9. Swenson SM, Chamberlain LJ, Sanders LM, Sundaram V, Wise PH. Outpatient Pharmacy  
23 Expenditures for Children With Serious Chronic Illness in California, 2010-2012. *Jama*.  
24 2015;314(4):405-7.
- 25 10. Canadian Institute for Health Information. CIHI data quality study of Ontario emergency  
26 department visits for 2004–2005: volume II of IV—main study findings. . Ottawa, Canada; 2008.
- 27 11. Canadian Institute for Health Information. CIHI data quality study of the 2009–2010  
28 discharge abstract database. Ottawa, Canada; 2012.
- 29 12. Lee JM, Sundaram V, Sanders L, Chamberlain L, Wise P. Health Care Utilization and Costs of  
30 Publicly-Insured Children with Diabetes in California. *J Pediatr*. 2015;167(2):449-54 e6.
- 31 13. Guttmann A, Nakhla M, Henderson M, To T, Daneman D, Cauch-Dudek K, et al. Validation of a  
32 health administrative data algorithm for assessing the epidemiology of diabetes in Canadian children.  
33 *Pediatr Diabetes*. 2010;11(2):122-8.
- 34 14. Hux JE, Ivis F, Flintoft V, Bica A. Diabetes in Ontario: determination of prevalence and  
35 incidence using a validated administrative data algorithm. *Diabetes Care*. 2002;25(3):512-6.
- 36 15. Juurlink D PC, Croxford R, Chong A, Austin P, Tu J, Laupacis A. Canadian Institute for Health  
37 Information Discharge Abstract Database: A Validation Study. . Toronto, Canada: Institute for Clinical  
38 Evaluative Sciences; 2006.
- 39 16. Canadian Institute for Health Information. CIHI Data Quality Study of Ontario Emergency  
40 Department Visits for Fiscal Year 2004-2005- Executive Summary. . Ottawa, Canada; 2008.
- 41 17. Shulman R, Miller FA, Stukel TA, Daneman D, Guttmann A. Resources and population served: a  
42 description of the Ontario Paediatric Diabetes Network. *CMAJ Open*. 2016;4(2):E141-6.
- 43 18. United States Census Bureau. Single Years of Age and Sex: 2010 2011 [Available from:  
44 [http://factfinder2.census.gov/faces/tableservices/jsf/pages/productview.xhtml?pid=DEC\\_10\\_SF1\\_QTP2](http://factfinder2.census.gov/faces/tableservices/jsf/pages/productview.xhtml?pid=DEC_10_SF1_QTP2).
- 45 19. Statistics Canada. Population centre 2012 [Available from: [http://www12.statcan.gc.ca/census-  
46 recensement/2011/ref/dict/geo049a-eng.cfm](http://www12.statcan.gc.ca/census-recensement/2011/ref/dict/geo049a-eng.cfm).
- 47 20. United States Census Bureau. QuickFacts: California 2010 [Available from:  
48 <http://www.census.gov/quickfacts/table/AGE275210/06>.

- 1 21. Statistics Canada. Annual population estimates by age group and sex at July 1, provincial  
2 perspective — Ontario 2010 [Available from: [http://www.statcan.gc.ca/pub/91-215-x/2012000/t518-  
4 eng.htm](http://www.statcan.gc.ca/pub/91-215-x/2012000/t518-<br/>3 eng.htm)].
- 5 22. Pihoker C, Forsander G, Wolfsdorf J, Klingensmith GJ. The delivery of ambulatory diabetes care  
6 to children and adolescents with diabetes. *Pediatr Diabetes*. 2009;10 Suppl 12:58-70.
- 7 23. Chiang JL, Kirkman MS, Laffel LM, Peters AL, Type 1 Diabetes Sourcebook A. Type 1 diabetes  
8 through the life span: a position statement of the American Diabetes Association. *Diabetes Care*.  
9 2014;37(7):2034-54.
- 10 24. Provincial Council for Maternal and Child Health. Ontario Paediatric Diabetes Network  
11 Current State Survey Report. 2013.
- 12 25. Mustard CA, Derksen S, Berthelot JM, Wolfson M. Assessing ecologic proxies for household  
13 income: a comparison of household and neighbourhood level income measures in the study of population  
14 health status. *Health Place*. 1999;5(2):157-71.
- 15 26. US Department of Health and Human Services. THE 2009 HHS POVERTY GUIDELINES  
16 2009 [Available from: <http://aspe.hhs.gov/poverty/09poverty.shtml>].
- 17 27. Center for Medicaid and CHIP Services. State Medicaid and CHIP Income Eligibility  
18 Standards [Available from: [http://www.medicare.gov/AffordableCareAct/Medicaid-Moving-Forward-  
20 2014/Downloads/Medicaid-and-CHIP-Eligibility-Levels-Table.pdf](http://www.medicare.gov/AffordableCareAct/Medicaid-Moving-Forward-<br/>19 2014/Downloads/Medicaid-and-CHIP-Eligibility-Levels-Table.pdf)].
- 21 28. Hadden L, Zdeb M. . ZIP Code 411: A Well-Kept SAS® Secret [Available from:  
22 <http://www2.sas.com/proceedings/sugi31/143-31.pdf>].
- 23 29. United States Department of Agriculture Economic Research Service. Rural-Urban  
24 Continuum Codes 2013 [Available from: [http://www.ers.usda.gov/data-products/rural-urban-continuum-  
26 codes.aspx#U0](http://www.ers.usda.gov/data-products/rural-urban-continuum-<br/>25 codes.aspx#U0)].
- 27 30. Agency for Healthcare Research and Quality. Diabetes Short-Term Complications Admission  
28 Rate Technical Specifications. 2013.
- 29 31. Amed S, Nuernberger K, McCrea P, Reimer K, Krueger H, Aydede SK, et al. Adherence to  
30 clinical practice guidelines in the management of children, youth, and young adults with type 1 diabetes--  
31 a prospective population cohort study. *J Pediatr*. 2013;163(2):543-8.
- 32 32. American Diabetes Association. Standards of medical care in diabetes--2014. *Diabetes Care*.  
33 2014;37 Suppl 1:S14-80.
- 34 33. Canadian Diabetes Association. 2008 Clinical Practice Guidelines for the Prevention and  
35 Management of Diabetes in Canada. . *Can J Diabetes* 2008;32:S150-67.
- 36 34. Lee JM, Davis MM, Menon RK, Freed GL. Geographic distribution of childhood diabetes and  
37 obesity relative to the supply of pediatric endocrinologists in the United States.[Erratum appears in *J*  
38 *Pediatr*. 2008 Jun;152(6):893]. *J Pediatr*. 2008;152(3):331-6.
- 39 35. Statistics Canada. Ethnic Diversity and Immigration 2012 [Available from:  
40 <http://www.statcan.gc.ca/pub/11-402-x/2012000/chap/imm/imm-eng.htm?fpv=30000>].
- 41 36. Statistics Canada. Population by Year, by Province and Territory 2014 [Available from:  
42 <http://www.statcan.gc.ca/tables-tableaux/sum-som/l01/cst01/demo02a-eng.htm>].
- 43 37. Pew Research Center. 15 States with the Highest Share of Immigrants in Their Population 2014  
44 [Available from: [http://www.pewresearch.org/fact-tank/2014/05/14/15-states-with-the-highest-share-of-  
46 immigrants-in-their-population/](http://www.pewresearch.org/fact-tank/2014/05/14/15-states-with-the-highest-share-of-<br/>45 immigrants-in-their-population/)].
- 47 38. Employment and Social Development Canada. Financial Security- Income Distribution 2015  
48 [Available from: <http://www4.hrsdc.gc.ca/.3ndic.1t.4r@-eng.jsp?iid=22>].
- 49 39. Kozyrskyj AL, Dahl ME, Chateau DG, Mazowita GB, Klassen TP, Law BJ. Evidence-based  
50 prescribing of antibiotics for children: role of socioeconomic status and physician characteristics. *CMAJ*.  
51 2004;171(2):139-45.
- 52 40. Wang C, Guttmann A, To T, Dick PT. Neighborhood income and health outcomes in infants:  
53 how do those with complex chronic conditions fare? *Arch Pediatr Adolesc Med*. 2009;163(7):608-15.

1  
2  
3 1 41. Amed S, Dean HJ, Panagiotopoulos C, Sellers EA, Hadjiyannakis S, Laubscher TA, et al. Type 2  
4 2 diabetes, medication-induced diabetes, and monogenic diabetes in Canadian children: a prospective  
5 3 national surveillance study. Diabetes Care. 2010;33(4):786-91.  
6  
7 4  
8  
9 5  
10  
11  
12 6  
13  
14  
15  
16 7  
17  
18  
19 8  
20  
21  
22 9  
23  
24  
25  
26 10  
27  
28  
29 11  
30  
31  
32 12  
33  
34  
35 13  
36  
37  
38 14  
39  
40  
41 15  
42  
43  
44  
45 16  
46  
47  
48 17  
49  
50  
51 18  
52  
53  
54  
55  
56  
57  
58  
59  
60

Confidential

1  
2  
3  
4  
5  
6  
7  
8  
9  
10  
11  
12  
13  
14  
15  
16  
17  
18  
19  
20  
21  
22  
23  
24  
25  
26  
27  
28  
29  
30  
31  
32  
33  
34  
35  
36  
37  
38  
39  
40  
41  
42  
43  
44  
45  
46  
47  
48  
49  
50  
51  
52  
53  
54  
55  
56  
57  
58  
59  
60

1 **Figure 1. Age-Standardized Diabetes Mellitus Complication Hospitalization Rates by Sex,**  
2 **Children from Low-Income Families in California (California Children’s Services) and**  
3 **Ontario (Ontario Drug Benefit Program)**

4 **Figure 1.** Diabetes Mellitus Complication Hospitalization Rates were clinically comparable for  
5 children from low-income families in Ontario compared to California (Absolute Differences  
6 0.02[95% Confidence Interval: 0.02-0.02]/patient-year for males and 0.03[95% Confidence  
7 Interval: 0.03-0.03]/patient-year for females), CCS: California Children’s Services, ODBP:  
8 Ontario Drug Benefit Program

Confidential

**Table 1. Characteristics of Children with Diabetes Mellitus from Low-income Families in Ontario (Ontario Drug Benefit Program) and California (California Children's Services)**

| Characteristic                                    | California CCS <sup>a</sup><br>(N=4,922) | Ontario<br>ODBP <sup>b</sup><br>(N=2,050) | p-value <sup>c</sup><br>(CCS vs<br>ODBP) |
|---------------------------------------------------|------------------------------------------|-------------------------------------------|------------------------------------------|
| <b>Male, n (%)</b>                                | 2,265 (46.0)                             | 1,077 (52.5)                              | <b>&lt;0.001</b>                         |
| <b>Age</b>                                        |                                          |                                           |                                          |
| <i>mean (SD), years</i>                           | 10.8 (3.9)                               | 10.5 (4.1)                                | <b>0.004</b>                             |
| <i>median (IQR), years</i>                        | 11 (8-14)                                | 11 (8-14)                                 |                                          |
| <b>Income Quintile, n (%)<sup>d</sup></b>         |                                          |                                           |                                          |
| 5 (high)                                          |                                          | 273 (13.3)                                |                                          |
| 4                                                 |                                          | 339 (16.5)                                |                                          |
| 3                                                 |                                          | 360 (17.6)                                |                                          |
| 2                                                 |                                          | 431 (21.0)                                |                                          |
| 1 (low)                                           |                                          | 637 (31.1)                                |                                          |
| Missing                                           |                                          | 10 (0.5)                                  |                                          |
| <b>Type of Insurance, n (%)<sup>e</sup></b>       |                                          |                                           |                                          |
| Medicaid                                          | 2,511 (51.1)                             |                                           |                                          |
| Healthy Families                                  | 350 (7.1)                                |                                           |                                          |
| CCS-only                                          | 88 (1.8)                                 |                                           |                                          |
| Mixed <sup>f</sup>                                | 1,973 (40.1)                             |                                           |                                          |
| <b>Race, n (%)<sup>e</sup></b>                    |                                          |                                           |                                          |
| White                                             | 1,396 (28.4)                             |                                           |                                          |
| Black                                             | 444 (9.0)                                |                                           |                                          |
| Hispanic                                          | 2,288 (46.5)                             |                                           |                                          |
| Native American                                   | 20 (0.4)                                 |                                           |                                          |
| Asian/Pacific Islander                            | 190 (3.9)                                |                                           |                                          |
| Other                                             | 471 (9.5)                                |                                           |                                          |
| Unknown                                           | 113 (2.3)                                |                                           |                                          |
| <b>Insulin Pump, n (%)</b>                        | 1,124 (22.8)                             | 336 (16.4)                                | <b>&lt;0.001</b>                         |
| <b>DM<sup>g</sup> Care Provider Type, n (%)</b>   |                                          |                                           |                                          |
| Pediatric Endocrinologist                         | 3,144 (63.9)                             | 551 (26.9)                                | Reference                                |
| Pediatrician                                      | 676 (13.7)                               | 971 (47.4)                                | <b>&lt;0.001</b>                         |
| Adult Endocrinologist                             | 32 (0.7)                                 | 81 (4.0)                                  | <b>&lt;0.001</b>                         |
| Family Physician                                  | 74 (1.5)                                 | 172 (8.4)                                 | <b>&lt;0.001</b>                         |
| Internal Medicine                                 | 8 (0.2)                                  | 24 (1.2)                                  | <b>&lt;0.001</b>                         |
| Unknown                                           | 627 (12.7)                               | 200 (9.8)                                 | -                                        |
| Other                                             | 341 (6.9)                                | 51 (2.5)                                  | -                                        |
| <b>Distance to Nearest DM<sup>g</sup> Center,</b> |                                          |                                           |                                          |
| <i>mean (SD), km</i>                              | 46.2 (53.6)                              | 16.5 (23.8)                               | <b>&lt;0.001</b>                         |
| <i>median (IQR), km</i>                           | 25.6 (12.2-59.9)                         | 8 (4-20)                                  |                                          |
| <b>Location, n (%)</b>                            |                                          |                                           |                                          |
| Rural                                             | 155 (3.2)                                | 273 (13.3)                                | <b>&lt;0.001</b>                         |
| Urban                                             | 4767 (96.9)                              | 1,775 (86.6)                              |                                          |

<sup>a</sup> California Children's Services, <sup>b</sup> Ontario Drug Benefit Program, <sup>c</sup> Determined using Chi-square test for categorical variables and Student's t-test for continuous variables, <sup>d</sup> Only calculated for Ontario children, <sup>e</sup> Only calculated for California CCS children, <sup>f</sup> Children who switched insurance status during the time period, <sup>g</sup> Diabetes Mellitus

1  
2  
3  
4  
5  
6  
7  
8  
9  
10  
11  
12  
13  
14  
15  
16  
17  
18  
19  
20  
21  
22  
23  
24  
25  
26  
27  
28  
29  
30  
31  
32  
33  
34  
35  
36  
37  
38  
39  
40  
41  
42  
43  
44  
45  
46  
47  
48  
49  
50  
51  
52  
53  
54  
55  
56  
57  
58  
59  
60

1 **Table 2. Comparison of Other Healthcare Utilization of Children with Diabetes Mellitus from**  
2 **low-income families in California (California Children’s Services) and Ontario (Ontario Drug**  
3 **Benefit Program)**

| Type of Visit                                                                      | Jurisdiction                                 |                                           |                                          |
|------------------------------------------------------------------------------------|----------------------------------------------|-------------------------------------------|------------------------------------------|
|                                                                                    | California<br>CCS <sup>a</sup><br>(N=4,922 ) | Ontario<br>ODBP <sup>b</sup><br>(N=2,050) | p-value <sup>c</sup><br>(CCS vs<br>ODBP) |
| <b>DM<sup>d</sup>-Routine Visits</b>                                               |                                              |                                           |                                          |
| Proportion with $\geq 2$ visits per person-year, n (%)                             | 3,185 (64.7)                                 | 1552 (75.7)                               | <0.001                                   |
| Visits per Patient-Year, mean (95% CI)                                             | 2.85 (2.80-2.90)                             | 3.40 (3.35-3.45)                          | <0.001                                   |
| <b>Other Hospitalizations</b>                                                      |                                              |                                           |                                          |
| Hospitalizations per Patient-Year, mean (95% CI)                                   | 0.11 (0.11-0.09)                             | 0.12 (0.11-0.13)                          | 0.052                                    |
| <b>DM<sup>d</sup>-Complication Emergency Department<br/>Visit Rate<sup>e</sup></b> |                                              |                                           |                                          |
| Visits per Patient-Year, mean (95% CI)                                             | 0.03 (0.02-0.03)                             | 0.03 (0.03-0.04)                          | 1.0                                      |

4 <sup>a</sup> California Children’s Services, <sup>b</sup> Ontario Drug Benefit Program, <sup>c</sup> Determined using Chi-square test for proportion  
5 with >2 DM-routine visits, Student’s t-test for visit/hospitalization rates per patient-year, <sup>d</sup> Diabetes Mellitus, <sup>e</sup>  
6 Excludes visits that end in hospital admission



1 **Table 3. Comparison of Children with Diabetes Mellitus from Low-income Families**  
 2 **(Ontario Drug Benefit Program) to All Other Children within Ontario**

|                                                                      | Ontario ODBP <sup>a</sup><br>(N=2,050) | Other Ontario<br>(N=6,120) | p-value <sup>b</sup> |
|----------------------------------------------------------------------|----------------------------------------|----------------------------|----------------------|
| <b>Patient Characteristics</b>                                       |                                        |                            |                      |
| <b>Male, n (%)</b>                                                   | 1,077 (52.5)                           | 3,200 (52.3)               | 0.84                 |
| <b>Age</b>                                                           |                                        |                            |                      |
| <i>mean (SD), years</i>                                              | 10.5 (4.1)                             | 11.1 (4.0)                 | <0.001               |
| <i>median (IQR), years</i>                                           | 11 (8-14)                              | 12 (9-14)                  |                      |
| <b>Income Quintile, n (%)</b>                                        |                                        |                            |                      |
| 5 (high)                                                             | 273 (13.3)                             | 1,498 (24.5)               | Reference            |
| 4                                                                    | 339 (16.5)                             | 1,400 (22.9)               | 0.002                |
| 3                                                                    | 360 (17.6)                             | 1,262 (20.6)               | <0.001               |
| 2                                                                    | 431 (21.0)                             | 1,058 (17.3)               | <0.001               |
| 1 (low)                                                              | 637 (31.1)                             | 830 (13.6)                 | <0.001               |
| Missing                                                              | 10 (0.5)                               | 72 (1.2)                   | -                    |
| <b>Insulin Pump, n (%)</b>                                           | 336 (16.4)                             | 1,441 (23.5)               | <0.001               |
| <b>DM<sup>c</sup> Care Provider Type, n (%)</b>                      |                                        |                            |                      |
| Pediatric Endocrinologist                                            | 551 (26.9)                             | 1,473 (24.1)               | Reference            |
| Pediatrician                                                         | 971 (47.4)                             | 2,685 (43.9)               | 0.58                 |
| Adult Endocrinologist                                                | 81 (4.0)                               | 243 (4.0)                  | 0.40                 |
| Family Physician                                                     | 172 (8.4)                              | 526 (8.6)                  | 0.18                 |
| Internal Medicine                                                    | 24 (1.2)                               | 105 (1.7)                  | 0.03                 |
| Unknown                                                              | 200 (9.8)                              | 1,013 (16.6)               | -                    |
| <b>Distance to Nearest DM<sup>c</sup> Center,</b>                    |                                        |                            |                      |
| <i>mean (SD), km</i>                                                 | 16.5 (23.8)                            | 24.4 (102.8)               | <0.001               |
| <i>median (IQR), km</i>                                              | 8 (4-20)                               | 9 (5-20)                   |                      |
| <b>Location, n (%)</b>                                               |                                        |                            |                      |
| Rural                                                                | 273 (13.3)                             | 818 (13.4)                 | 0.89                 |
| Urban                                                                | 1,775 (86.6)                           | 5,263 (86.0)               |                      |
| <b>Health Care Utilization</b>                                       |                                        |                            |                      |
|                                                                      | Ontario ODBP <sup>a</sup><br>(N=2,192) | Other Ontario<br>(N=6,120) | p-value <sup>d</sup> |
| <b>Age-Standardized DM<sup>c</sup>-Complication Hospitalizations</b> |                                        |                            |                      |
| Males, Hospitalizations per Patient-Year, mean (CI)                  | 0.06 (0.05-0.07)                       | 0.02 (0.02-0.03)           | <0.001               |
| Females, Hospitalizations per Patient-Year, mean (CI)                | 0.08 (0.07-0.09)                       | 0.03 (0.03-0.04)           | <0.001               |
| <b>Other Hospitalizations</b>                                        |                                        |                            |                      |
| Hospitalizations per Patient-Year, mean (CI)                         | 0.12 (0.11-0.13)                       | 0.05 (0.05-0.05)           | <0.001               |
| <b>DM<sup>c</sup>-Routine Visits</b>                                 |                                        |                            |                      |
| Proportion with ≥2 visits per person-year, n (%)                     | 1,552 (75.7)                           | 4,345 (71.0)               | <0.001               |
| Visits per Patient-Year, mean (CI)                                   | 3.40 (3.35-3.45)                       | 3.18 (3.15-3.21)           | <0.001               |
| <b>DM<sup>c</sup>-Complication Emergency Department Visit Rate</b>   |                                        |                            |                      |
| Visits per Patient-Year, mean (CI)                                   | 0.03 (0.03-0.04)                       | 0.02 (0.02-0.02)           | <0.001               |

3 <sup>a</sup> Ontario Drug Benefit Program, <sup>b</sup> Determined using Chi-square test for categorical variables and Student's t-test for  
 4 continuous variables, <sup>c</sup> Diabetes Mellitus, <sup>d</sup> Determined using Chi-square test for proportion with >2 DM-routine  
 5 visits, Student's t-test for visit/hospitalization rates per patient-year

6

**Figure 1. Age-Standardized Diabetes Mellitus Complication Hospitalization Rates by Sex, Children from Low-Income Families in California (California Children’s Services) and Ontario (Ontario Drug Benefit Program)**

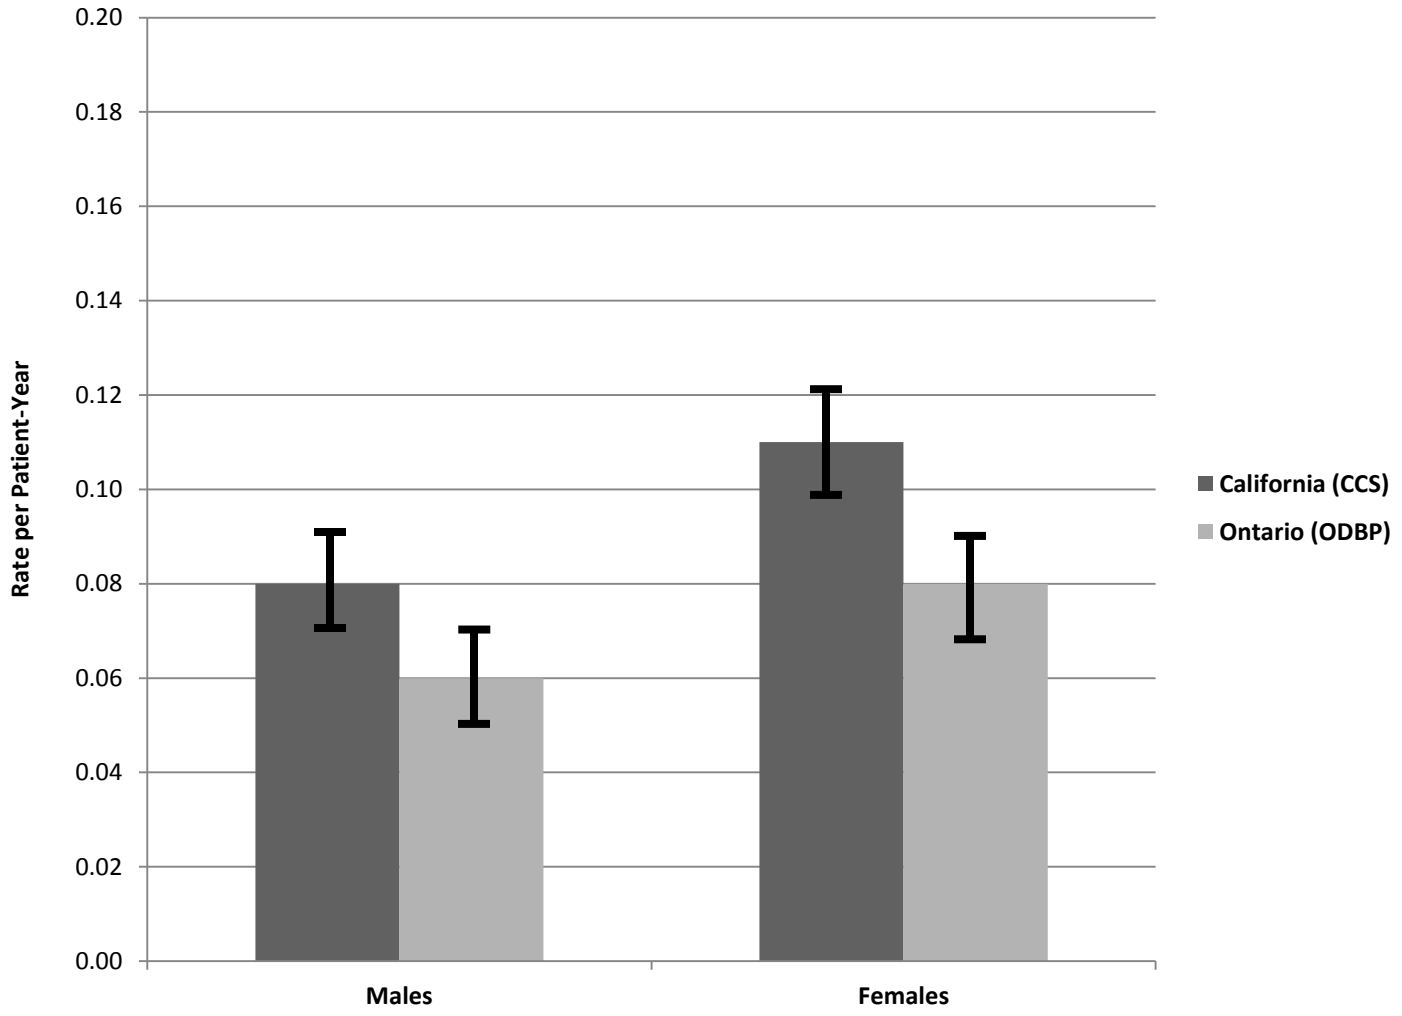

**Figure 1.** Diabetes Mellitus Complication Hospitalization Rates were clinically comparable for children from low-income families in Ontario compared to California (Absolute Differences 0.02[95% Confidence Interval: 0.02-0.02]/patient-year for males and 0.03[95% Confidence Interval: 0.03-0.03]/patient-year for females), CCS: California Children’s Services, ODBP: Ontario Drug Benefit Program

For Peer Review Only

1  
2  
3  
4  
5  
6  
7  
8  
9  
10  
11  
12  
13  
14  
15  
16  
17  
18  
19  
20  
21  
22  
23  
24  
25  
26  
27  
28  
29  
30  
31  
32  
33  
34  
35  
36  
37  
38  
39  
40  
41  
42  
43  
44  
45  
46  
47  
48  
49  
50  
51  
52  
53  
54  
55  
56  
57  
58  
59  
60

### Appendix 1: Codes Used for Analysis

| Codes Used to Identify Use of Insulin |                                         |
|---------------------------------------|-----------------------------------------|
| NDC Number                            | Generic Name                            |
| 00169330312                           | insulin aspart, recombinant             |
| 00169633910                           | insulin aspart, recombinant             |
| 00169750111                           | insulin aspart, recombinant             |
| 54868277700                           | insulin aspart, recombinant             |
| 54868605400                           | insulin aspart, recombinant             |
| 00169368213                           | insulin aspart/insulin aspart protamine |
| 00169368512                           | insulin aspart/insulin aspart protamine |
| 00169369619                           | insulin aspart/insulin aspart protamine |
| 54868520100                           | insulin aspart/insulin aspart protamine |
| 54868532700                           | insulin aspart/insulin aspart protamine |
| 00169368712                           | insulin detemir                         |
| 00169643910                           | insulin detemir                         |
| 54868011200                           | insulin detemir                         |
| 54868588300                           | insulin detemir                         |
| 00088221905                           | insulin glargine, recombinant           |
| 00088222033                           | insulin glargine, recombinant           |
| 00088222052                           | insulin glargine, recombinant           |
| 00088222060                           | insulin glargine, recombinant           |
| 49999099410                           | insulin glargine, recombinant           |
| 54569560500                           | insulin glargine, recombinant           |
| 54868462600                           | insulin glargine, recombinant           |
| 54868576500                           | insulin glargine, recombinant           |
| 55045368501                           | insulin glargine, recombinant           |
| 68115083910                           | insulin glargine, recombinant           |
| 00088250033                           | insulin glulisine                       |
| 00088250052                           | insulin glulisine                       |
| 00088250205                           | insulin glulisine                       |
| 00002831501                           | insulin human isophane (nph)            |
| 00002831517                           | insulin human isophane (nph)            |
| 00002831591                           | insulin human isophane (nph)            |
| 00002831759                           | insulin human isophane (nph)            |
| 00002873059                           | insulin human isophane (nph)            |
| 00003183410                           | insulin human isophane (nph)            |
| 00169004571                           | insulin human isophane (nph)            |
| 00169022201                           | insulin human isophane (nph)            |
| 00169033301                           | insulin human isophane (nph)            |
| 00169183411                           | insulin human isophane (nph)            |
| 00169183417                           | insulin human isophane (nph)            |
| 00169183418                           | insulin human isophane (nph)            |
| 00169231421                           | insulin human isophane (nph)            |
| 00169347418                           | insulin human isophane (nph)            |
| 00403296118                           | insulin human isophane (nph)            |
| 54569231800                           | insulin human isophane (nph)            |
| 54569231801                           | insulin human isophane (nph)            |

|    |             |                                                    |
|----|-------------|----------------------------------------------------|
| 1  |             |                                                    |
| 2  |             |                                                    |
| 3  |             |                                                    |
| 4  | 54569383500 | insulin human isophane (nph)                       |
| 5  | 54569383501 | insulin human isophane (nph)                       |
| 6  | 54569383502 | insulin human isophane (nph)                       |
| 7  | 54868142901 | insulin human isophane (nph)                       |
| 8  | 54868238001 | insulin human isophane (nph)                       |
| 9  | 58016478801 | insulin human isophane (nph)                       |
| 10 | 59060183402 | insulin human isophane (nph)                       |
| 11 | 59060231404 | insulin human isophane (nph)                       |
| 12 | 68115072905 | insulin human isophane (nph)                       |
| 13 | 68258898501 | insulin human isophane (nph)                       |
| 14 | 68258898601 | insulin human isophane (nph)                       |
| 15 |             |                                                    |
| 16 | 00002871501 | insulin human isophane (nph)/insulin human regular |
| 17 | 00002871591 | insulin human isophane (nph)/insulin human regular |
| 18 | 00002871759 | insulin human isophane (nph)/insulin human regular |
| 19 | 00002877059 | insulin human isophane (nph)/insulin human regular |
| 20 | 00002951501 | insulin human isophane (nph)/insulin human regular |
| 21 |             |                                                    |
| 22 | 00003183710 | insulin human isophane (nph)/insulin human regular |
| 23 | 00169001771 | insulin human isophane (nph)/insulin human regular |
| 24 | 00169183711 | insulin human isophane (nph)/insulin human regular |
| 25 | 00169183717 | insulin human isophane (nph)/insulin human regular |
| 26 | 00169183718 | insulin human isophane (nph)/insulin human regular |
| 27 | 00169231721 | insulin human isophane (nph)/insulin human regular |
| 28 | 00169347718 | insulin human isophane (nph)/insulin human regular |
| 29 |             |                                                    |
| 30 | 49999099310 | insulin human isophane (nph)/insulin human regular |
| 31 | 54569291800 | insulin human isophane (nph)/insulin human regular |
| 32 | 54569291801 | insulin human isophane (nph)/insulin human regular |
| 33 | 54569291802 | insulin human isophane (nph)/insulin human regular |
| 34 | 54569346700 | insulin human isophane (nph)/insulin human regular |
| 35 | 54569346701 | insulin human isophane (nph)/insulin human regular |
| 36 | 54868274600 | insulin human isophane (nph)/insulin human regular |
| 37 | 54868347400 | insulin human isophane (nph)/insulin human regular |
| 38 | 54868582400 | insulin human isophane (nph)/insulin human regular |
| 39 |             |                                                    |
| 40 | 55045350801 | insulin human isophane (nph)/insulin human regular |
| 41 | 55045362401 | insulin human isophane (nph)/insulin human regular |
| 42 | 59060183702 | insulin human isophane (nph)/insulin human regular |
| 43 | 59060231704 | insulin human isophane (nph)/insulin human regular |
| 44 |             |                                                    |
| 45 | 00002821501 | insulin human regular                              |
| 46 | 00002821517 | insulin human regular                              |
| 47 | 00002821591 | insulin human regular                              |
| 48 | 00002821759 | insulin human regular                              |
| 49 | 00002850101 | insulin human regular                              |
| 50 | 00003183310 | insulin human regular                              |
| 51 | 00003183315 | insulin human regular                              |
| 52 | 00003183415 | insulin human regular                              |
| 53 | 00003183715 | insulin human regular                              |
| 54 | 00169004471 | insulin human regular                              |
| 55 | 00169183311 | insulin human regular                              |
| 56 | 00169183317 | insulin human regular                              |
| 57 |             |                                                    |
| 58 |             |                                                    |
| 59 |             |                                                    |
| 60 |             |                                                    |

|    |                   |                                                                 |
|----|-------------------|-----------------------------------------------------------------|
| 1  |                   |                                                                 |
| 2  |                   |                                                                 |
| 3  |                   |                                                                 |
| 4  | 00169183318       | insulin human regular                                           |
| 5  | 00169231321       | insulin human regular                                           |
| 6  | 00169347318       | insulin human regular                                           |
| 7  | 00403344918       | insulin human regular                                           |
| 8  | 23490668700       | insulin human regular                                           |
| 9  | 54569231900       | insulin human regular                                           |
| 10 | 54569231901       | insulin human regular                                           |
| 11 | 54569383300       | insulin human regular                                           |
| 12 | 54569383301       | insulin human regular                                           |
| 13 | 54569383302       | insulin human regular                                           |
| 14 | 54868359800       | insulin human regular                                           |
| 15 | 54868361900       | insulin human regular                                           |
| 16 | 55045350601       | insulin human regular                                           |
| 17 | 59060183302       | insulin human regular                                           |
| 18 | 68115070905       | insulin human regular                                           |
| 19 | 68115072810       | insulin human regular                                           |
| 20 |                   |                                                                 |
| 21 | 00002821601       | insulin human regular, buffered                                 |
| 22 | 00169007011       | insulin human regular, buffered                                 |
| 23 |                   |                                                                 |
| 24 | 00002751001       | insulin lispro, recombinant                                     |
| 25 | 00002751017       | insulin lispro, recombinant                                     |
| 26 | 00002751559       | insulin lispro, recombinant                                     |
| 27 | 00002751659       | insulin lispro, recombinant                                     |
| 28 | 00002872559       | insulin lispro, recombinant                                     |
| 29 | 00002879959       | insulin lispro, recombinant                                     |
| 30 |                   |                                                                 |
| 31 | 35356010200       | insulin lispro, recombinant                                     |
| 32 | 54868510800       | insulin lispro, recombinant                                     |
| 33 | 54868583600       | insulin lispro, recombinant                                     |
| 34 | 54868589900       | insulin lispro, recombinant                                     |
| 35 | 66143751005       | insulin lispro, recombinant                                     |
| 36 | 68115074610       | insulin lispro, recombinant                                     |
| 37 |                   |                                                                 |
| 38 | 00002751101       | insulin lispro/insulin lispro protamine                         |
| 39 | 00002751201       | insulin lispro/insulin lispro protamine                         |
| 40 | 00002879359       | insulin lispro/insulin lispro protamine                         |
| 41 | 00002879459       | insulin lispro/insulin lispro protamine                         |
| 42 | 00002879759       | insulin lispro/insulin lispro protamine                         |
| 43 | 00002879859       | insulin lispro/insulin lispro protamine                         |
| 44 | 54569532100       | insulin lispro/insulin lispro protamine                         |
| 45 | 54868438100       | insulin lispro/insulin lispro protamine                         |
| 46 | 00169011101       | insulin, human regular buffered                                 |
| 47 | 00169750111       | NOVOLOG 100/MLVIANOVN                                           |
| 48 | 08290328438       | INSULIN SYRI31GX5/SYNBD D                                       |
| 49 | 08290328440       | INSULIN SYRI31GX5/SYNBD D                                       |
| 50 |                   |                                                                 |
| 51 | <b>HCPCS code</b> | <b>Description</b>                                              |
| 52 | X6366             | INSULIN INJ/BEEF/PORK/PANCREAS                                  |
| 53 | S8490             | Insulin syringes (100 syringes, any size)                       |
| 54 | A4230             | Infusion set for external insulin pump, non-needle cannula type |
| 55 | A4231             | Infusion set for external insulin pump, needle type             |
| 56 | A4232             | Syringe with needle for external insulin pump, sterile, 3cc     |
| 57 |                   |                                                                 |
| 58 |                   |                                                                 |
| 59 |                   |                                                                 |
| 60 |                   |                                                                 |

|    |                                                      |                                                                                                      |
|----|------------------------------------------------------|------------------------------------------------------------------------------------------------------|
| 1  |                                                      |                                                                                                      |
| 2  |                                                      |                                                                                                      |
| 3  |                                                      |                                                                                                      |
| 4  | A9274                                                | External ambulatory insulin delivery system, disposable, each, includes all supplies and accessories |
| 5  | E0784                                                | External ambulatory infusion pump, insulin                                                           |
| 6  | J1815                                                | Injection, insulin, per 5 units                                                                      |
| 7  | J1817                                                | Insulin for administration through DME (i.e., insulin pump) per 50 units                             |
| 8  | S5550                                                | Insulin, rapid onset, 5 units                                                                        |
| 9  | S5551                                                | Insulin, most rapid onset (Lispro or Aspart); 5 units                                                |
| 10 | S5552                                                | Insulin, intermediate acting (NPH or LENTE); 5 units                                                 |
| 11 | S5553                                                | Insulin, long acting; 5 units                                                                        |
| 12 | S5560                                                | Insulin delivery device, reusable pen; 1.5 ml size                                                   |
| 13 | S5561                                                | Insulin delivery device, reusable pen; 3 ml size                                                     |
| 14 | S5565                                                | Insulin cartridge for use in insulin delivery device other than pump; 150 units                      |
| 15 | S5566                                                | Insulin cartridge for use in insulin delivery device other than pump; 300 units                      |
| 16 | S5570                                                | Insulin delivery device, disposable pen (including insulin); 1.5 ml size                             |
| 17 | S5571                                                | Insulin delivery device, disposable pen (including insulin); 3 ml size                               |
| 18 | S9145                                                | Insulin pump initiation, instruction in initial use of pump (pump not included)                      |
| 19 |                                                      |                                                                                                      |
| 20 | <b>Codes Used to Identify Use of an Insulin Pump</b> |                                                                                                      |
| 21 | NDC Number                                           | Trade name                                                                                           |
| 22 | 61058602833                                          | DELTEC COZMO CLEO INFUSION SET                                                                       |
| 23 | 61058602834                                          |                                                                                                      |
| 24 | 61058602835                                          |                                                                                                      |
| 25 | 61058602839                                          |                                                                                                      |
| 26 | 61058602840                                          |                                                                                                      |
| 27 | 61058602841                                          |                                                                                                      |
| 28 | 65781439602                                          | INSET 30 INFUSION SET                                                                                |
| 29 | 65781036102                                          | INSET INFUSION SET                                                                                   |
| 30 | 65781136102                                          |                                                                                                      |
| 31 | 8521307010                                           | INSULIN PUMP RESERVOIR                                                                               |
| 32 | 76300050001                                          | MEDTRONIC REMOTE CONTROL                                                                             |
| 33 | 76300039010                                          | MINIMED                                                                                              |
| 34 | 76300039110                                          |                                                                                                      |
| 35 | 76300039210                                          |                                                                                                      |
| 36 | 76300039310                                          |                                                                                                      |
| 37 | 76300039501                                          |                                                                                                      |
| 38 | 76300039610                                          |                                                                                                      |
| 39 | 76300039710                                          |                                                                                                      |
| 40 | 76300039810                                          |                                                                                                      |
| 41 | 76300039910                                          |                                                                                                      |
| 42 | 76300010310                                          | MINIMED RESERVOIR                                                                                    |
| 43 | 76300010324                                          |                                                                                                      |
| 44 | 76300092110                                          | MIO INFUSION SET                                                                                     |
| 45 | 76300092310                                          |                                                                                                      |
| 46 | 76300092510                                          |                                                                                                      |
| 47 | 76300094110                                          |                                                                                                      |
| 48 | 76300094310                                          |                                                                                                      |
| 49 | 76300094510                                          |                                                                                                      |
| 50 |                                                      |                                                                                                      |
| 51 |                                                      |                                                                                                      |
| 52 |                                                      |                                                                                                      |
| 53 |                                                      |                                                                                                      |
| 54 |                                                      |                                                                                                      |
| 55 |                                                      |                                                                                                      |
| 56 |                                                      |                                                                                                      |
| 57 |                                                      |                                                                                                      |
| 58 |                                                      |                                                                                                      |
| 59 |                                                      |                                                                                                      |
| 60 |                                                      |                                                                                                      |

|    |             |                               |
|----|-------------|-------------------------------|
| 1  |             |                               |
| 2  |             |                               |
| 3  |             |                               |
| 4  | 76300096510 |                               |
| 5  | 76300097510 |                               |
| 6  | 76300032610 | PARADIGM                      |
| 7  | 76300032620 |                               |
| 8  |             |                               |
| 9  | 76300033210 |                               |
| 10 | 76300031221 | PARADIGM INFUSION             |
| 11 | 76300031222 |                               |
| 12 | 76300012201 | PARADIGM INSULIN PUMP PATHWAY |
| 13 |             |                               |
| 14 | 76300022201 |                               |
| 15 | 76300052201 |                               |
| 16 | 8290333200  | PARADIGM LINK BLOOD GLUCOSE   |
| 17 | 8290333201  |                               |
| 18 | 8290333202  |                               |
| 19 |             |                               |
| 20 | 8290333203  |                               |
| 21 | 76300001701 | PARADIGM REAL-TIME            |
| 22 |             |                               |
| 23 | 76300050301 | PARADIGM REMOTE CONTROL       |
| 24 | 76300036810 | PARADIGM SILHOUETTE           |
| 25 | 76300038110 |                               |
| 26 |             |                               |
| 27 | 76300038210 |                               |
| 28 | 76300038310 |                               |
| 29 |             |                               |
| 30 | 76300038410 |                               |
| 31 | 76300031512 | QUICK RELEASE SOFT TEFLON     |
| 32 | 76300031612 |                               |
| 33 | 8189609000  | QUICK-CHECK FILM              |
| 34 | 57565006090 |                               |
| 35 |             |                               |
| 36 | 8189608000  | QUICK-CHECK II                |
| 37 | 57565006080 |                               |
| 38 | 8189607000  | QUICK-CHECK ONE               |
| 39 |             |                               |
| 40 | 57565006070 |                               |
| 41 | 76300038610 | QUICK-SET PARADIGM            |
| 42 | 76300038710 |                               |
| 43 |             |                               |
| 44 | 76300039410 |                               |
| 45 | 76300036910 | SILHOUETTE                    |
| 46 | 76300037010 |                               |
| 47 | 76300037110 |                               |
| 48 |             |                               |
| 49 | 76300037205 |                               |
| 50 | 76300037310 |                               |
| 51 | 76300037405 |                               |
| 52 | 76300037410 |                               |
| 53 |             |                               |
| 54 | 76300037710 |                               |
| 55 | 76300037810 |                               |
| 56 | 76300037905 |                               |
| 57 |             |                               |
| 58 | 76300037910 |                               |
| 59 |             |                               |
| 60 |             |                               |

|    |                    |                                                                                                      |
|----|--------------------|------------------------------------------------------------------------------------------------------|
| 1  |                    |                                                                                                      |
| 2  |                    |                                                                                                      |
| 3  | 76300038005        |                                                                                                      |
| 4  | 76300038010        |                                                                                                      |
| 5  |                    |                                                                                                      |
| 6  | 76300038501        | SIL-SERTER                                                                                           |
| 7  | 76300000211        | SOF-SENSOR                                                                                           |
| 8  |                    |                                                                                                      |
| 9  | 76300000214        |                                                                                                      |
| 10 | 76300030001        | SOF-SERTER                                                                                           |
| 11 | 76300011124        | SOF-SET                                                                                              |
| 12 | 76300011224        |                                                                                                      |
| 13 |                    |                                                                                                      |
| 14 | 76300031712        |                                                                                                      |
| 15 | 76300031812        |                                                                                                      |
| 16 |                    |                                                                                                      |
| 17 | 76300032412        |                                                                                                      |
| 18 | 76300032512        |                                                                                                      |
| 19 | 76300032012        | SOF-SET MICRO                                                                                        |
| 20 | 76300032112        |                                                                                                      |
| 21 | 50924058001        | SOFT TOUCH                                                                                           |
| 22 | 50924058510        |                                                                                                      |
| 23 |                    |                                                                                                      |
| 24 | 50924093720        |                                                                                                      |
| 25 | 50924095120        |                                                                                                      |
| 26 |                    |                                                                                                      |
| 27 | 75537000580        |                                                                                                      |
| 28 | 75537000585        |                                                                                                      |
| 29 | 75537000937        |                                                                                                      |
| 30 | 75537009512        |                                                                                                      |
| 31 |                    |                                                                                                      |
| 32 | 76300084010        | SURE-T                                                                                               |
| 33 | 76300087210        |                                                                                                      |
| 34 | 76300086210        | SURE-T PARADIGM                                                                                      |
| 35 | 76300086410        |                                                                                                      |
| 36 | 76300086610        |                                                                                                      |
| 37 | 76300087410        |                                                                                                      |
| 38 | 76300087610        |                                                                                                      |
| 39 |                    |                                                                                                      |
| 40 | 76300088610        |                                                                                                      |
| 41 |                    |                                                                                                      |
| 42 | <b>HCPCS Codes</b> | <b>Description</b>                                                                                   |
| 43 | A4221              | Supplies for maintenance of drug infusion catheter, per week (list drug separately)                  |
| 44 | A4222              | Infusion supplies for external drug infusion pump, per cassette or bag (list drugs separately)       |
| 45 | A4230              | Infusion set for external insulin pump, non-needle cannula type                                      |
| 46 | A4231              | Infusion set for external insulin pump, needle type                                                  |
| 47 | A4232              | Syringe with needle for external insulin pump, sterile, 3cc                                          |
| 48 | A4601              | Lithium ion battery for non-prosthetic use, replacement                                              |
| 49 | A6257              | Transparent film, sterile, 16 sq. in. or less, each dressing                                         |
| 50 | A6258              | Transparent film, sterile, more than 16 sq. in. but less than or equal to 48 sq. in., each dressing  |
| 51 | A6259              | Transparent film, sterile, more than 48 sq. in., each dressing                                       |
| 52 | A9274              | External ambulatory insulin delivery system, disposable, each, includes all supplies and accessories |
| 53 | E0784              | External ambulatory infusion pump, insulin                                                           |
| 54 | J1817              | Insulin for administration through DME (i.e., insulin pump) per 50 units                             |
| 55 | K0601              | Replacement battery for external infusion pump                                                       |
| 56 | K0602              | Replacement battery for external infusion pump                                                       |
| 57 |                    |                                                                                                      |
| 58 |                    |                                                                                                      |
| 59 |                    |                                                                                                      |
| 60 |                    |                                                                                                      |



|                                                                |                                                                                                                                                                                                                                        |
|----------------------------------------------------------------|----------------------------------------------------------------------------------------------------------------------------------------------------------------------------------------------------------------------------------------|
| K0603                                                          | Replacement battery for external infusion pump                                                                                                                                                                                         |
| K0604                                                          | Replacement battery for external infusion pump                                                                                                                                                                                         |
| K0605                                                          | Replacement battery for external infusion pump                                                                                                                                                                                         |
| K0552                                                          | Supplies for external drug infusion pump, syringe type cartridge, sterile, each                                                                                                                                                        |
| S9145                                                          | Insulin pump initiation, instruction in initial use of pump (pump not included)                                                                                                                                                        |
| S9353                                                          | Home infusion therapy, continuous insulin infusion therapy; administrative services, professional pharmacy services, care coordination, and all necessary supplies and equipment (drugs and nursing visits coded separately), per diem |
| <b>Codes Used to Identify Oral Hypoglycemic Use in Ontario</b> |                                                                                                                                                                                                                                        |
| Drug Identification Code                                       | Generic drug name                                                                                                                                                                                                                      |
| 00009806                                                       | METFORMIN HCL                                                                                                                                                                                                                          |
| 00012556                                                       | CHLORPROPAMIDE                                                                                                                                                                                                                         |
| 00012564                                                       | CHLORPROPAMIDE                                                                                                                                                                                                                         |
| 00012599                                                       | GLYBURIDE                                                                                                                                                                                                                              |
| 00012602                                                       | TOLBUTAMIDE                                                                                                                                                                                                                            |
| 00012610                                                       | TOLBUTAMIDE                                                                                                                                                                                                                            |
| 00013730                                                       | CHLORPROPAMIDE                                                                                                                                                                                                                         |
| 00013889                                                       | TOLBUTAMIDE                                                                                                                                                                                                                            |
| 00015598                                                       | ACETOHEXAMIDE                                                                                                                                                                                                                          |
| 00017167                                                       | TOLBUTAMIDE                                                                                                                                                                                                                            |
| 00021350                                                       | CHLORPROPAMIDE                                                                                                                                                                                                                         |
| 00021849                                                       | TOLBUTAMIDE                                                                                                                                                                                                                            |
| 00024708                                                       | CHLORPROPAMIDE                                                                                                                                                                                                                         |
| 00024716                                                       | CHLORPROPAMIDE                                                                                                                                                                                                                         |
| 00093033                                                       | TOLBUTAMIDE                                                                                                                                                                                                                            |
| 00156663                                                       | TOLBUTAMIDE                                                                                                                                                                                                                            |
| 00156728                                                       | CHLORPROPAMIDE                                                                                                                                                                                                                         |
| 00178543                                                       | TOLBUTAMIDE                                                                                                                                                                                                                            |
| 00193662                                                       | GLYBURIDE                                                                                                                                                                                                                              |
| 00209872                                                       | TOLBUTAMIDE                                                                                                                                                                                                                            |
| 00209937                                                       | CHLORPROPAMIDE                                                                                                                                                                                                                         |
| 00237000                                                       | TOLBUTAMIDE                                                                                                                                                                                                                            |
| 00244449                                                       | GLYBURIDE                                                                                                                                                                                                                              |
| 00247111                                                       | CHLORPROPAMIDE                                                                                                                                                                                                                         |
| 00271330                                                       | CHLORPROPAMIDE                                                                                                                                                                                                                         |
| 00309265                                                       | CHLORPROPAMIDE                                                                                                                                                                                                                         |
| 00312711                                                       | CHLORPROPAMIDE                                                                                                                                                                                                                         |
| 00312762                                                       | TOLBUTAMIDE                                                                                                                                                                                                                            |
| 00314552                                                       | METFORMIN HCL                                                                                                                                                                                                                          |
| 00314730                                                       | TOLBUTAMIDE                                                                                                                                                                                                                            |
| 00324361                                                       | TOLBUTAMIDE                                                                                                                                                                                                                            |
| 00377937                                                       | CHLORPROPAMIDE                                                                                                                                                                                                                         |
| 00379948                                                       | CHLORPROPAMIDE                                                                                                                                                                                                                         |
| 00399302                                                       | CHLORPROPAMIDE                                                                                                                                                                                                                         |
| 00420336                                                       | GLYBURIDE                                                                                                                                                                                                                              |
| 00430986                                                       | CHLORPROPAMIDE                                                                                                                                                                                                                         |
| 00431168                                                       | TOLBUTAMIDE                                                                                                                                                                                                                            |
| 00438111                                                       | GLYBURIDE                                                                                                                                                                                                                              |

1  
2  
3  
4  
5  
6  
7  
8  
9  
10  
11  
12  
13  
14  
15  
16  
17  
18  
19  
20  
21  
22  
23  
24  
25  
26  
27  
28  
29  
30  
31  
32  
33  
34  
35  
36  
37  
38  
39  
40  
41  
42  
43  
44  
45  
46  
47  
48  
49  
50  
51  
52  
53  
54  
55  
56  
57  
58  
59  
60

|          |                |
|----------|----------------|
| 00454753 | GLYBURIDE      |
| 00480290 | GLYBURIDE      |
| 00480304 | GLYBURIDE      |
| 00502391 | TOLBUTAMIDE    |
| 00584932 | CHLORPROPAMIDE |
| 00586773 | CHLORPROPAMIDE |
| 00720933 | GLYBURIDE      |
| 00720941 | GLYBURIDE      |
| 00765966 | GLICLAZIDE     |
| 00765996 | GLICLAZIDE     |
| 00808733 | GLYBURIDE      |
| 00808741 | GLYBURIDE      |
| 00813176 | GLICLAZIDE     |
| 00913662 | GLYBURIDE      |
| 00913670 | GLYBURIDE      |
| 00913689 | GLYBURIDE      |
| 00990329 | METFORMIN HCL  |
| 01900927 | GLYBURIDE      |
| 01900935 | GLYBURIDE      |
| 01913654 | GLYBURIDE      |
| 01913662 | GLYBURIDE      |
| 01913670 | GLYBURIDE      |
| 01913689 | GLYBURIDE      |
| 01959352 | GLYBURIDE      |
| 01959360 | GLYBURIDE      |
| 01987534 | GLYBURIDE      |
| 01987542 | TOLBUTAMIDE    |
| 01987828 | TOLBUTAMIDE    |
| 01987836 | GLYBURIDE      |
| 01990837 | GLYBURIDE      |
| 01990845 | GLYBURIDE      |
| 02020734 | GLYBURIDE      |
| 02020742 | GLYBURIDE      |
| 02045710 | METFORMIN HCL  |
| 02084341 | GLYBURIDE      |
| 02085887 | GLYBURIDE      |
| 02099233 | METFORMIN HCL  |
| 02147521 | GLYBURIDE      |
| 02147548 | GLYBURIDE      |
| 02148765 | METFORMIN      |
| 02155850 | GLICLAZIDE     |
| 02162822 | METFORMIN HCL  |
| 02162849 | METFORMIN HCL  |
| 02167786 | METFORMIN HCL  |
| 02188902 | METFORMIN HCL  |
| 02190885 | ACARBOSE       |
| 02190893 | ACARBOSE       |
| 02220628 | METFORMIN HCL  |
| 02223562 | METFORMIN HCL  |
| 02224550 | GLYBURIDE      |

|          |                       |
|----------|-----------------------|
| 02224569 | GLYBURIDE             |
| 02224771 | TOLBUTAMIDE           |
| 02224798 | TOLBUTAMIDE           |
| 02226804 | GLYBURIDE             |
| 02226812 | GLYBURIDE             |
| 02228920 | GLYBURIDE             |
| 02228939 | GLYBURIDE             |
| 02229516 | METFORMIN HCL         |
| 02229517 | METFORMIN HCL         |
| 02229519 | GLICLAZIDE            |
| 02229595 | GLYBURIDE             |
| 02229596 | GLYBURIDE             |
| 02229656 | METFORMIN             |
| 02229785 | METFORMIN HCL         |
| 02229994 | METFORMIN HCL         |
| 02230026 | METFORMIN HCL         |
| 02230027 | METFORMIN HCL         |
| 02230036 | GLYBURIDE             |
| 02230037 | GLYBURIDE             |
| 02230443 | GLIPIZIDE             |
| 02230444 | GLIPIZIDE             |
| 02230475 | METFORMIN HCL         |
| 02230670 | METFORMIN HCL         |
| 02230671 | METFORMIN HCL         |
| 02231058 | METFORMIN HCL         |
| 02231095 | TROGLITAZONE          |
| 02231096 | TROGLITAZONE          |
| 02231389 | METFORMIN HCL         |
| 02233999 | METFORMIN HCL         |
| 02234513 | GLYBURIDE             |
| 02234514 | GLYBURIDE             |
| 02236543 | GLYBURIDE             |
| 02236548 | GLYBURIDE             |
| 02236733 | GLYBURIDE             |
| 02236734 | GLYBURIDE             |
| 02236985 | TROGLITAZONE          |
| 02236986 | TROGLITAZONE          |
| 02237531 | TROGLITAZONE          |
| 02238103 | GLICLAZIDE            |
| 02238698 | TROGLITAZONE          |
| 02238827 | METFORMIN HCL         |
| 02239081 | METFORMIN HCL         |
| 02239214 | METFORMIN HCL         |
| 02239924 | REPAGLINIDE           |
| 02239925 | REPAGLINIDE           |
| 02239926 | REPAGLINIDE           |
| 02241111 | ROSIGLITAZONE MALEATE |
| 02241112 | ROSIGLITAZONE MALEATE |
| 02241113 | ROSIGLITAZONE MALEATE |
| 02241114 | ROSIGLITAZONE MALEATE |

|    |          |                                       |
|----|----------|---------------------------------------|
| 1  |          |                                       |
| 2  |          |                                       |
| 3  |          |                                       |
| 4  | 02242095 | GLYBURIDE                             |
| 5  | 02242096 | GLYBURIDE                             |
| 6  | 02242572 | PIOGLITAZONE HCL                      |
| 7  | 02242573 | PIOGLITAZONE HCL                      |
| 8  | 02242574 | PIOGLITAZONE HCL                      |
| 9  | 02242589 | METFORMIN HCL                         |
| 10 | 02242726 | METFORMIN HCL                         |
| 11 | 02242783 | METFORMIN HCL                         |
| 12 | 02242793 | METFORMIN HCL                         |
| 13 | 02242794 | METFORMIN HCL                         |
| 14 | 02242931 | METFORMIN HCL                         |
| 15 | 02242974 | METFORMIN HCL                         |
| 16 | 02242987 | GLICLAZIDE                            |
| 17 | 02245247 | GLICLAZIDE                            |
| 18 | 02245272 | GLIMEPIRIDE                           |
| 19 | 02245273 | GLIMEPIRIDE                           |
| 20 | 02245274 | GLIMEPIRIDE                           |
| 21 | 02245438 | NATEGLINIDE                           |
| 22 | 02245439 | NATEGLINIDE                           |
| 23 | 02245440 | NATEGLINIDE                           |
| 24 | 02246613 | METFORMIN HCL                         |
| 25 | 02246614 | METFORMIN HCL                         |
| 26 | 02246820 | METFORMIN HCL                         |
| 27 | 02246821 | METFORMIN HCL                         |
| 28 | 02246964 | METFORMIN HCL                         |
| 29 | 02246965 | METFORMIN HCL                         |
| 30 | 02247085 | METFORMIN HCL & ROSIGLITAZONE MALEATE |
| 31 | 02247086 | METFORMIN HCL & ROSIGLITAZONE MALEATE |
| 32 | 02247087 | METFORMIN HCL & ROSIGLITAZONE MALEATE |
| 33 | 02248008 | GLYBURIDE                             |
| 34 | 02248009 | GLYBURIDE                             |
| 35 | 02248210 | GLICLAZIDE                            |
| 36 | 02248440 | METFORMIN HCL & ROSIGLITAZONE MALEATE |
| 37 | 02248441 | METFORMIN HCL & ROSIGLITAZONE MALEATE |
| 38 | 02248453 | GLICLAZIDE                            |
| 39 | 02252945 | METFORMIN HCL                         |
| 40 | 02252953 | METFORMIN HCL                         |
| 41 | 02254719 | GLICLAZIDE                            |
| 42 | 02257726 | METFORMIN HCL                         |
| 43 | 02257734 | METFORMIN HCL                         |
| 44 | 02258781 | GLIMEPIRIDE & ROSIGLITAZONE MALEATE   |
| 45 | 02258803 | GLIMEPIRIDE & ROSIGLITAZONE MALEATE   |
| 46 | 02258811 | GLIMEPIRIDE & ROSIGLITAZONE MALEATE   |
| 47 | 02265575 | METFORMIN HCL                         |
| 48 | 02265583 | METFORMIN HCL                         |
| 49 | 02268493 | METFORMIN HCL                         |
| 50 | 02268507 | METFORMIN HCL                         |
| 51 | 02269031 | METFORMIN HCL                         |
| 52 | 02269058 | METFORMIN HCL                         |
| 53 | 02269589 | GLIMEPIRIDE                           |
| 54 |          |                                       |
| 55 |          |                                       |
| 56 |          |                                       |
| 57 |          |                                       |
| 58 |          |                                       |
| 59 |          |                                       |
| 60 |          |                                       |

|          |                  |
|----------|------------------|
| 02269597 | GLIMEPIRIDE      |
| 02269600 | GLIMEPIRIDE      |
| 02269619 | GLIMEPIRIDE      |
| 02273101 | GLIMEPIRIDE      |
| 02273128 | GLIMEPIRIDE      |
| 02273136 | GLIMEPIRIDE      |
| 02273756 | GLIMEPIRIDE      |
| 02273764 | GLIMEPIRIDE      |
| 02273772 | GLIMEPIRIDE      |
| 02274248 | GLIMEPIRIDE      |
| 02274256 | GLIMEPIRIDE      |
| 02274264 | GLIMEPIRIDE      |
| 02274272 | GLIMEPIRIDE      |
| 02274914 | PIOGLITAZONE HCL |
| 02274922 | PIOGLITAZONE HCL |
| 02274930 | PIOGLITAZONE HCL |
| 02279061 | GLIMEPIRIDE      |
| 02279088 | GLIMEPIRIDE      |
| 02279126 | GLIMEPIRIDE      |
| 02284545 | GLIMEPIRIDE      |
| 02284553 | GLIMEPIRIDE      |
| 02284782 | METFORMIN HCL    |
| 02284790 | METFORMIN HCL    |
| 02286149 | GLYBURIDE        |
| 02286157 | GLYBURIDE        |
| 02287072 | GLICLAZIDE       |
| 02293862 | GLICLAZIDE       |
| 02294400 | GLICLAZIDE       |
| 02295377 | GLIMEPIRIDE      |
| 02295385 | GLIMEPIRIDE      |
| 02295393 | GLIMEPIRIDE      |
| 02297795 | GLICLAZIDE       |
| 02297906 | PIOGLITAZONE HCL |
| 02297914 | PIOGLITAZONE HCL |
| 02297922 | PIOGLITAZONE HCL |
| 02298279 | PIOGLITAZONE HCL |
| 02298287 | PIOGLITAZONE HCL |
| 02298295 | PIOGLITAZONE HCL |
| 02300451 | METFORMIN HCL    |
| 02301423 | PIOGLITAZONE HCL |
| 02301431 | PIOGLITAZONE HCL |
| 02301458 | PIOGLITAZONE HCL |
| 02302861 | PIOGLITAZONE HCL |
| 02302888 | PIOGLITAZONE HCL |
| 02302896 | PIOGLITAZONE HCL |
| 02302942 | PIOGLITAZONE HCL |
| 02302950 | PIOGLITAZONE HCL |
| 02302977 | PIOGLITAZONE HCL |
| 02303124 | PIOGLITAZONE HCL |
| 02303132 | PIOGLITAZONE HCL |

1  
2  
3  
4  
5  
6  
7  
8  
9  
10  
11  
12  
13  
14  
15  
16  
17  
18  
19  
20  
21  
22  
23  
24  
25  
26  
27  
28  
29  
30  
31  
32  
33  
34  
35  
36  
37  
38  
39  
40  
41  
42  
43  
44  
45  
46  
47  
48  
49  
50  
51  
52  
53  
54  
55  
56  
57  
58  
59  
60

|          |                                       |
|----------|---------------------------------------|
| 02303140 | PIOGLITAZONE HCL                      |
| 02303442 | PIOGLITAZONE HCL                      |
| 02303450 | PIOGLITAZONE HCL                      |
| 02303469 | PIOGLITAZONE HCL                      |
| 02303922 | SITAGLIPTIN PHOSPHATE                 |
| 02305062 | METFORMIN HCL                         |
| 02306166 | ROSIGLITAZONE MALEATE                 |
| 02306174 | ROSIGLITAZONE MALEATE                 |
| 02306182 | ROSIGLITAZONE MALEATE                 |
| 02307634 | PIOGLITAZONE HCL                      |
| 02307642 | PIOGLITAZONE HCL                      |
| 02307650 | PIOGLITAZONE HCL                      |
| 02307669 | PIOGLITAZONE HCL                      |
| 02307677 | PIOGLITAZONE HCL                      |
| 02307723 | PIOGLITAZONE HCL                      |
| 02312050 | PIOGLITAZONE HCL                      |
| 02312069 | PIOGLITAZONE HCL                      |
| 02312077 | PIOGLITAZONE HCL                      |
| 02313596 | GLIMEPIRIDE                           |
| 02314894 | METFORMIN HCL                         |
| 02314908 | METFORMIN HCL                         |
| 02316544 | GLYBURIDE                             |
| 02320754 | PIOGLITAZONE HCL                      |
| 02320762 | PIOGLITAZONE HCL                      |
| 02320770 | PIOGLITAZONE HCL                      |
| 02321475 | REPAGLINIDE HCL                       |
| 02321483 | REPAGLINIDE HCL                       |
| 02321491 | REPAGLINIDE HCL                       |
| 02326329 | ROSIGLITAZONE MALEATE                 |
| 02326337 | ROSIGLITAZONE MALEATE                 |
| 02326345 | ROSIGLITAZONE MALEATE                 |
| 02326477 | PIOGLITAZONE HCL                      |
| 02326485 | PIOGLITAZONE HCL                      |
| 02326493 | PIOGLITAZONE HCL                      |
| 02331519 | METFORMIN HCL                         |
| 02331527 | METFORMIN HCL                         |
| 02333554 | SAXAGLIPTIN HCL                       |
| 02333856 | METFORMIN HCL & SITAGLIPTIN PHOSPHATE |
| 02333864 | METFORMIN HCL & SITAGLIPTIN PHOSPHATE |
| 02333872 | METFORMIN HCL & SITAGLIPTIN PHOSPHATE |
| 02334437 | METFORMIN HCL                         |
| 02334445 | METFORMIN HCL                         |
| 02334674 | PIOGLITAZONE HCL                      |
| 02334682 | PIOGLITAZONE HCL                      |
| 02334690 | PIOGLITAZONE HCL                      |
| 02336316 | GLICLAZIDE                            |
| 02339110 | METFORMIN HCL                         |
| 02339129 | METFORMIN HCL                         |
| 02339587 | PIOGLITAZONE HCL                      |
| 02339595 | PIOGLITAZONE HCL                      |

|          |                                       |
|----------|---------------------------------------|
| 02339676 | PIOGLITAZONE HCL                      |
| 02339684 | PIOGLITAZONE HCL                      |
| 02339692 | PIOGLITAZONE HCL                      |
| 02340763 | GLYBURIDE                             |
| 02340771 | GLYBURIDE                             |
| 02341522 | METFORMIN HCL                         |
| 02341603 | METFORMIN HCL                         |
| 02343606 | METFORMIN HCL                         |
| 02343614 | METFORMIN HCL                         |
| 02345366 | PIOGLITAZONE HCL                      |
| 02345374 | PIOGLITAZONE HCL                      |
| 02345382 | PIOGLITAZONE HCL                      |
| 02345854 | GLYBURIDE                             |
| 02345862 | GLYBURIDE                             |
| 02348578 | GLICLAZIDE                            |
| 02350289 | METFORMIN HCL                         |
| 02350300 | METFORMIN HCL                         |
| 02350459 | GLYBURIDE                             |
| 02350467 | GLYBURIDE                             |
| 02353377 | METFORMIN HCL                         |
| 02353385 | METFORMIN HCL                         |
| 02354144 | ROSIGLITAZONE MALEATE                 |
| 02354152 | ROSIGLITAZONE MALEATE                 |
| 02354160 | ROSIGLITAZONE MALEATE                 |
| 02354349 | ROSIGLITAZONE MALEATE                 |
| 02354357 | ROSIGLITAZONE MALEATE                 |
| 02354365 | ROSIGLITAZONE MALEATE                 |
| 02354926 | REPAGLINIDE                           |
| 02354934 | REPAGLINIDE                           |
| 02354942 | REPAGLINIDE                           |
| 02355663 | REPAGLINIDE                           |
| 02355671 | REPAGLINIDE                           |
| 02355698 | REPAGLINIDE                           |
| 02356422 | GLICLAZIDE                            |
| 02357453 | REPAGLINIDE                           |
| 02357461 | REPAGLINIDE                           |
| 02357488 | REPAGLINIDE                           |
| 02357887 | ROSIGLITAZONE MALEATE & METFORMIN HCL |
| 02357895 | ROSIGLITAZONE MALEATE & METFORMIN HCL |
| 02357909 | ROSIGLITAZONE MALEATE & METFORMIN HCL |
| 02357917 | ROSIGLITAZONE MALEATE & METFORMIN HCL |
| 02357925 | ROSIGLITAZONE MALEATE & METFORMIN HCL |
| 02361264 | METFORMIN HCL                         |
| 02361272 | METFORMIN HCL                         |
| 02363232 | PIOGLITAZONE HCL                      |
| 02363240 | PIOGLITAZONE HCL                      |
| 02363259 | PIOGLITAZONE HCL                      |
| 02363518 | GLICLAZIDE                            |
| 02363704 | GLYBURIDE                             |
| 02363712 | GLYBURIDE                             |

1  
2  
3  
4  
5  
6  
7  
8  
9  
10  
11  
12  
13  
14  
15  
16  
17  
18  
19  
20  
21  
22  
23  
24  
25  
26  
27  
28  
29  
30  
31  
32  
33  
34  
35  
36  
37  
38  
39  
40  
41  
42  
43  
44  
45  
46  
47  
48  
49  
50  
51  
52  
53  
54  
55  
56  
57  
58  
59  
60

|          |                                       |
|----------|---------------------------------------|
| 02364506 | METFORMIN HCL                         |
| 02364514 | METFORMIN HCL                         |
| 02365286 | METFORMIN HCL                         |
| 02365294 | METFORMIN HCL                         |
| 02365529 | PIOGLITAZONE HCL                      |
| 02365537 | PIOGLITAZONE HCL                      |
| 02366347 | REPAGLINIDE                           |
| 02366355 | REPAGLINIDE                           |
| 02366363 | REPAGLINIDE                           |
| 02373270 | REPAGLINIDE                           |
| 02373289 | REPAGLINIDE                           |
| 02373297 | REPAGLINIDE                           |
| 02374013 | PIOGLITAZONE HCL                      |
| 02374021 | PIOGLITAZONE HCL                      |
| 02374048 | PIOGLITAZONE HCL                      |
| 02374587 | PIOGLITAZONE HCL                      |
| 02374595 | PIOGLITAZONE HCL                      |
| 02375842 | SAXAGLIPTIN HCL                       |
| 02375850 | PIOGLITAZONE HCL                      |
| 02375869 | PIOGLITAZONE HCL                      |
| 02375877 | PIOGLITAZONE HCL                      |
| 02378043 | METFORMIN HCL                         |
| 02378051 | METFORMIN HCL                         |
| 02378116 | METFORMIN HCL                         |
| 02378124 | METFORMIN HCL                         |
| 02378620 | METFORMIN HCL                         |
| 02378639 | METFORMIN HCL                         |
| 02378841 | METFORMIN HCL                         |
| 02378868 | METFORMIN HCL                         |
| 02379767 | METFORMIN HCL                         |
| 02379775 | METFORMIN HCL                         |
| 02380196 | METFORMIN HCL                         |
| 02380218 | METFORMIN HCL                         |
| 02380722 | METFORMIN HCL                         |
| 02380730 | METFORMIN HCL                         |
| 02384906 | PIOGLITAZONE HCL                      |
| 02384914 | PIOGLITAZONE HCL                      |
| 02384922 | PIOGLITAZONE HCL                      |
| 02385341 | METFORMIN HCL                         |
| 02385368 | METFORMIN HCL                         |
| 02388766 | METFORMIN HCL                         |
| 02388774 | METFORMIN HCL                         |
| 02388839 | SITAGLIPTIN PHOSPHATE                 |
| 02388847 | SITAGLIPTIN PHOSPHATE                 |
| 02391600 | PIOGLITAZONE HCL                      |
| 02397307 | PIOGLITAZONE HCL                      |
| 02415968 | REPAGLINIDE                           |
| 02415976 | REPAGLINIDE HCL                       |
| 02415984 | REPAGLINIDE HCL                       |
| 02416794 | METFORMIN HCL & SITAGLIPTIN PHOSPHATE |



|                                                            |                           |
|------------------------------------------------------------|---------------------------|
| 22022429                                                   | METFORMIN HCL             |
| 22297850                                                   | METFORMIN HCL             |
| 22399260                                                   | REPAGLINIDE               |
| 25022429                                                   | METFORMIN HCL             |
| 49012599                                                   | GLYBURIDE                 |
| 81913662                                                   | GLYBURIDE                 |
| 82148765                                                   | METFORMIN                 |
| 82167786                                                   | METFORMIN HCL             |
| 99100755                                                   | METFORMIN HCL             |
| <b>Codes Used to Identify Oral Hypoglycemic Use in CCS</b> |                           |
| NDC                                                        | Generic Drug Name         |
| 00093725401                                                | GLIMEPIRIDE 1 MG TABTEVA  |
| 00093725501                                                | GLIMEPIRIDE 2 MG TABTEVA  |
| 00093725601                                                | GLIMEPIRIDE 4 MG TABTEVA  |
| 00781504601                                                | GLIMEPIRIDE 2 MG TABSAND  |
| 16729000201                                                | GLIMEPIRIDE 2 MG TABACCO  |
| 16729000301                                                | GLIMEPIRIDE 4 MG TABACCO  |
| 45802077078                                                | GLIMEPIRIDE 1 MG TABPERR  |
| 45802082278                                                | GLIMEPIRIDE 2 MG TABPERR  |
| 45802094778                                                | GLIMEPIRIDE 4 MG TABPERR  |
| 55111032001                                                | GLIMEPIRIDE 1 MG TABDR.R  |
| 55111032101                                                | GLIMEPIRIDE 2 MG TABDR.R  |
| 55111032105                                                | GLIMEPIRIDE 2 MG TABDR.R  |
| 55111032201                                                | GLIMEPIRIDE 4 MG TABDR.R  |
| 55111032205                                                | GLIMEPIRIDE 4 MG TABDR.R  |
| 63304042501                                                | GLIMEPIRIDE 1 MG TABRANB  |
| 66993016302                                                | GLIMEPIRIDE 2 MG TABPRAS  |
| 66993016402                                                | GLIMEPIRIDE 4 MG TABPRAS  |
| 60505014201                                                | GLIPIZIDE 10 MG TABAPOT   |
| 00172365070                                                | GLIPIZIDE 10 MG TABIVAX   |
| 00378111001                                                | GLIPIZIDE 10 MG TABMYLA   |
| 00378111005                                                | GLIPIZIDE 10 MG TABMYLA   |
| 00781145301                                                | GLIPIZIDE 10 MG TABSAND   |
| 00781145310                                                | GLIPIZIDE 10 MG TABSAND   |
| 00591046105                                                | GLIPIZIDE 10 MG TABWATS   |
| 00591046110                                                | GLIPIZIDE 10 MG TABWATS   |
| 59762503101                                                | GLIPIZIDE 2.5 MGTABGRN1   |
| 00591090030                                                | GLIPIZIDE 2.5 MGTABWATS   |
| 60505014102                                                | GLIPIZIDE 5 MG TABAPOT    |
| 00172364960                                                | GLIPIZIDE 5 MG TABIVAX    |
| 68645015054                                                | GLIPIZIDE 5 MG TABLEGA    |
| 00378110501                                                | GLIPIZIDE 5 MG TABMYLA    |
| 00378110505                                                | GLIPIZIDE 5 MG TABMYLA    |
| 00781145201                                                | GLIPIZIDE 5 MG TABSAND    |
| 00781145210                                                | GLIPIZIDE 5 MG TABSAND    |
| 00591046001                                                | GLIPIZIDE 5 MG TABWATS    |
| 00591046005                                                | GLIPIZIDE 5 MG TABWATS    |
| 00591046010                                                | GLIPIZIDE 5 MG TABWATS    |
| 00591084401                                                | GLIPIZIDE 5 MG TABWATS    |
| 00228275211                                                | GLYBMETFORHC2.5-50TABACTA |

|    |             |                           |
|----|-------------|---------------------------|
| 1  |             |                           |
| 2  |             |                           |
| 3  |             |                           |
| 4  | 00228275250 | GLYBMETFORHC2.5-50TABACTA |
| 5  | 00228275350 | GLYBMETFORHC5 MG-5TABACTA |
| 6  | 00093571201 | GLYBMETFORHC5 MG-5TABTEVA |
| 7  | 00093571205 | GLYBMETFORHC5 MG-5TABTEVA |
| 8  | 64720012410 | GLYBURIDE 2.5 MGTABCORE   |
| 9  | 00781114601 | GLYBURIDE 2.5 MGTABSAND   |
| 10 | 00093834301 | GLYBURIDE 2.5 MGTABTEVA   |
| 11 | 00093834310 | GLYBURIDE 2.5 MGTABTEVA   |
| 12 | 00093943305 | GLYBURIDE 2.5 MGTABTEVA   |
| 13 | 64720012510 | GLYBURIDE 5 MG TABCORE    |
| 14 | 64720012511 | GLYBURIDE 5 MG TABCORE    |
| 15 | 59762372707 | GLYBURIDE 5 MG TABGRN1    |
| 16 | 68645021154 | GLYBURIDE 5 MG TABLEGA    |
| 17 | 00781119101 | GLYBURIDE 5 MG TABSAND    |
| 18 | 00781119110 | GLYBURIDE 5 MG TABSAND    |
| 19 | 00093834401 | GLYBURIDE 5 MG TABTEVA    |
| 20 | 00093834410 | GLYBURIDE 5 MG TABTEVA    |
| 21 | 00093936401 | GLYBURIDE 5 MG TABTEVA    |
| 22 | 00093936405 | GLYBURIDE 5 MG TABTEVA    |
| 23 | 00093936410 | GLYBURIDE 5 MG TABTEVA    |
| 24 | 64720012310 | GLYBURIDE1.25 MG TABCORE  |
| 25 | 00093834201 | GLYBURIDE1.25 MG TABTEVA  |
| 26 | 62584025901 | METFORMIN 500 MGTABAHP    |
| 27 | 53746017801 | METFORMIN 500 MGTABAMNE   |
| 28 | 53746017805 | METFORMIN 500 MGTABAMNE   |
| 29 | 65162017510 | METFORMIN 500 MGTABAMNE   |
| 30 | 65162017511 | METFORMIN 500 MGTABAMNE   |
| 31 | 65162017550 | METFORMIN 500 MGTABAMNE   |
| 32 | 60505019000 | METFORMIN 500 MGTABAPOT   |
| 33 | 60505019001 | METFORMIN 500 MGTABAPOT   |
| 34 | 60505019008 | METFORMIN 500 MGTABAPOT   |
| 35 | 60505026001 | METFORMIN 500 MGTABAPOT   |
| 36 | 65862000801 | METFORMIN 500 MGTABAURO   |
| 37 | 65862000805 | METFORMIN 500 MGTABAURO   |
| 38 | 57664039713 | METFORMIN 500 MGTABCARA   |
| 39 | 57664039718 | METFORMIN 500 MGTABCARA   |
| 40 | 57664039751 | METFORMIN 500 MGTABCARA   |
| 41 | 57664039753 | METFORMIN 500 MGTABCARA   |
| 42 | 57664039758 | METFORMIN 500 MGTABCARA   |
| 43 | 57664039788 | METFORMIN 500 MGTABCARA   |
| 44 | 00185441601 | METFORMIN 500 MGTABEON    |
| 45 | 68462015905 | METFORMIN 500 MGTABGLEN   |
| 46 | 68462015910 | METFORMIN 500 MGTABGLEN   |
| 47 | 00172433160 | METFORMIN 500 MGTABIVAX   |
| 48 | 00172433180 | METFORMIN 500 MGTABIVAX   |
| 49 | 68645012059 | METFORMIN 500 MGTABLEGA   |
| 50 | 00904563461 | METFORMIN 500 MGTABMAJO   |
| 51 | 00904584980 | METFORMIN 500 MGTABMAJO   |
| 52 | 53489046705 | METFORMIN 500 MGTABMUTU   |
| 53 | 53489046710 | METFORMIN 500 MGTABMUTU   |
| 54 |             |                           |
| 55 |             |                           |
| 56 |             |                           |
| 57 |             |                           |
| 58 |             |                           |
| 59 |             |                           |
| 60 |             |                           |

|    |                                        |
|----|----------------------------------------|
| 1  |                                        |
| 2  |                                        |
| 3  |                                        |
| 4  |                                        |
| 5  |                                        |
| 6  |                                        |
| 7  |                                        |
| 8  |                                        |
| 9  |                                        |
| 10 |                                        |
| 11 |                                        |
| 12 |                                        |
| 13 |                                        |
| 14 |                                        |
| 15 |                                        |
| 16 |                                        |
| 17 |                                        |
| 18 |                                        |
| 19 |                                        |
| 20 |                                        |
| 21 |                                        |
| 22 |                                        |
| 23 |                                        |
| 24 |                                        |
| 25 |                                        |
| 26 |                                        |
| 27 |                                        |
| 28 |                                        |
| 29 |                                        |
| 30 |                                        |
| 31 |                                        |
| 32 |                                        |
| 33 |                                        |
| 34 |                                        |
| 35 |                                        |
| 36 |                                        |
| 37 |                                        |
| 38 |                                        |
| 39 |                                        |
| 40 |                                        |
| 41 |                                        |
| 42 |                                        |
| 43 |                                        |
| 44 |                                        |
| 45 |                                        |
| 46 |                                        |
| 47 |                                        |
| 48 |                                        |
| 49 |                                        |
| 50 |                                        |
| 51 |                                        |
| 52 |                                        |
| 53 |                                        |
| 54 |                                        |
| 55 |                                        |
| 56 |                                        |
| 57 |                                        |
| 58 |                                        |
| 59 |                                        |
| 60 |                                        |
|    | 00378023405   METFORMIN 500 MGTABMYLA  |
|    | 00378035205   METFORMIN 500 MGTABMYLA  |
|    | 00378718505   METFORMIN 500 MGTABMYLA  |
|    | 49884092101   METFORMIN 500 MGTABPAR   |
|    | 63304086001   METFORMIN 500 MGTABRANB  |
|    | 63304086005   METFORMIN 500 MGTABRANB  |
|    | 00781505001   METFORMIN 500 MGTABSAND  |
|    | 00781505005   METFORMIN 500 MGTABSAND  |
|    | 00781505010   METFORMIN 500 MGTABSAND  |
|    | 00781505061   METFORMIN 500 MGTABSAND  |
|    | 43547024810   METFORMIN 500 MGTABSOLC  |
|    | 43547024850   METFORMIN 500 MGTABSOLC  |
|    | 62756014201   METFORMIN 500 MGTABSUN   |
|    | 62756014202   METFORMIN 500 MGTABSUN   |
|    | 00093104801   METFORMIN 500 MGTABTEVA  |
|    | 00093104810   METFORMIN 500 MGTABTEVA  |
|    | 00093726701   METFORMIN 500 MGTABTEVA  |
|    | 00093726710   METFORMIN 500 MGTABTEVA  |
|    | 62037057101   METFORMIN 500 MGTABWATS  |
|    | 62037057110   METFORMIN 500 MGTABWATS  |
|    | 62037067401   METFORMIN 500 MGTABWATS  |
|    | 62037067410   METFORMIN 500 MGTABWATS  |
|    | 68382002801   METFORMIN 500 MGTABZYDU  |
|    | 68382002805   METFORMIN 500 MGTABZYDU  |
|    | 68382002810   METFORMIN 500 MGTABZYDU  |
|    | 53746017901   METFORMIN 750 MGTABAMNE  |
|    | 00555010702   METFORMIN 750 MGTABBAR2  |
|    | 62756014301   METFORMIN 750 MGTABSUN   |
|    | 00093721201   METFORMIN 750 MGTABTEVA  |
|    | 62037057701   METFORMIN 750 MGTABWATS  |
|    | 65162017450   METFORMIN 850 MGTABAMNE  |
|    | 65862000901   METFORMIN 850 MGTABAURO  |
|    | 65862000905   METFORMIN 850 MGTABAURO  |
|    | 57664043553   METFORMIN 850 MGTABCARA  |
|    | 57664043558   METFORMIN 850 MGTABCARA  |
|    | 00185021501   METFORMIN 850 MGTABEON   |
|    | 68462016005   METFORMIN 850 MGTABGLEN  |
|    | 00172433060   METFORMIN 850 MGTABIVAX  |
|    | 00172433080   METFORMIN 850 MGTABIVAX  |
|    | 00904585040   METFORMIN 850 MGTABMAJO  |
|    | 00904609161   METFORMIN 850 MGTABMAJO  |
|    | 53489046810   METFORMIN 850 MGTABMUTU  |
|    | 00378718605   METFORMIN 850 MGTABMYLA  |
|    | 00093104901   METFORMIN 850 MGTABTEVA  |
|    | 00093104910   METFORMIN 850 MGTABTEVA  |
|    | 68382002901   METFORMIN 850 MGTABZYDU  |
|    | 68382002905   METFORMIN 850 MGTABZYDU  |
|    | 68382002910   METFORMIN 850 MGTABZYDU  |
|    | 65162017710   METFORMIN1000 MG TABAMNE |
|    | 65162017711   METFORMIN1000 MG TABAMNE |

|    |                                                                                                                                                                                                                                                                                                                                                                                                                                                                                                                                                                                                   |                                                                                                                         |
|----|---------------------------------------------------------------------------------------------------------------------------------------------------------------------------------------------------------------------------------------------------------------------------------------------------------------------------------------------------------------------------------------------------------------------------------------------------------------------------------------------------------------------------------------------------------------------------------------------------|-------------------------------------------------------------------------------------------------------------------------|
| 1  |                                                                                                                                                                                                                                                                                                                                                                                                                                                                                                                                                                                                   |                                                                                                                         |
| 2  |                                                                                                                                                                                                                                                                                                                                                                                                                                                                                                                                                                                                   |                                                                                                                         |
| 3  |                                                                                                                                                                                                                                                                                                                                                                                                                                                                                                                                                                                                   |                                                                                                                         |
| 4  | 65162017750                                                                                                                                                                                                                                                                                                                                                                                                                                                                                                                                                                                       | METFORMIN1000 MG TABAMNE                                                                                                |
| 5  | 60505019200                                                                                                                                                                                                                                                                                                                                                                                                                                                                                                                                                                                       | METFORMIN1000 MG TABAPOT                                                                                                |
| 6  | 60505019201                                                                                                                                                                                                                                                                                                                                                                                                                                                                                                                                                                                       | METFORMIN1000 MG TABAPOT                                                                                                |
| 7  | 65862001001                                                                                                                                                                                                                                                                                                                                                                                                                                                                                                                                                                                       | METFORMIN1000 MG TABAURO                                                                                                |
| 8  | 65862001005                                                                                                                                                                                                                                                                                                                                                                                                                                                                                                                                                                                       | METFORMIN1000 MG TABAURO                                                                                                |
| 9  | 57664047451                                                                                                                                                                                                                                                                                                                                                                                                                                                                                                                                                                                       | METFORMIN1000 MG TABCARA                                                                                                |
| 10 | 57664047453                                                                                                                                                                                                                                                                                                                                                                                                                                                                                                                                                                                       | METFORMIN1000 MG TABCARA                                                                                                |
| 11 | 57664047458                                                                                                                                                                                                                                                                                                                                                                                                                                                                                                                                                                                       | METFORMIN1000 MG TABCARA                                                                                                |
| 12 | 57664047488                                                                                                                                                                                                                                                                                                                                                                                                                                                                                                                                                                                       | METFORMIN1000 MG TABCARA                                                                                                |
| 13 | 00185022101                                                                                                                                                                                                                                                                                                                                                                                                                                                                                                                                                                                       | METFORMIN1000 MG TABEON                                                                                                 |
| 14 | 68462016105                                                                                                                                                                                                                                                                                                                                                                                                                                                                                                                                                                                       | METFORMIN1000 MG TABGLEN                                                                                                |
| 15 | 68462016110                                                                                                                                                                                                                                                                                                                                                                                                                                                                                                                                                                                       | METFORMIN1000 MG TABGLEN                                                                                                |
| 16 | 59762432200                                                                                                                                                                                                                                                                                                                                                                                                                                                                                                                                                                                       | METFORMIN1000 MG TABGRN1                                                                                                |
| 17 | 00172443260                                                                                                                                                                                                                                                                                                                                                                                                                                                                                                                                                                                       | METFORMIN1000 MG TABIVAX                                                                                                |
| 18 | 00172443280                                                                                                                                                                                                                                                                                                                                                                                                                                                                                                                                                                                       | METFORMIN1000 MG TABIVAX                                                                                                |
| 19 | 00904585140                                                                                                                                                                                                                                                                                                                                                                                                                                                                                                                                                                                       | METFORMIN1000 MG TABMAJO                                                                                                |
| 20 | 53489046905                                                                                                                                                                                                                                                                                                                                                                                                                                                                                                                                                                                       | METFORMIN1000 MG TABMUTU                                                                                                |
| 21 | 53489046910                                                                                                                                                                                                                                                                                                                                                                                                                                                                                                                                                                                       | METFORMIN1000 MG TABMUTU                                                                                                |
| 22 | 00378024401                                                                                                                                                                                                                                                                                                                                                                                                                                                                                                                                                                                       | METFORMIN1000 MG TABMYLA                                                                                                |
| 23 | 00378718705                                                                                                                                                                                                                                                                                                                                                                                                                                                                                                                                                                                       | METFORMIN1000 MG TABMYLA                                                                                                |
| 24 | 00781505201                                                                                                                                                                                                                                                                                                                                                                                                                                                                                                                                                                                       | METFORMIN1000 MG TABSAND                                                                                                |
| 25 | 00781505205                                                                                                                                                                                                                                                                                                                                                                                                                                                                                                                                                                                       | METFORMIN1000 MG TABSAND                                                                                                |
| 26 | 00781505261                                                                                                                                                                                                                                                                                                                                                                                                                                                                                                                                                                                       | METFORMIN1000 MG TABSAND                                                                                                |
| 27 | 43547025010                                                                                                                                                                                                                                                                                                                                                                                                                                                                                                                                                                                       | METFORMIN1000 MG TABSOLC                                                                                                |
| 28 | 43547025050                                                                                                                                                                                                                                                                                                                                                                                                                                                                                                                                                                                       | METFORMIN1000 MG TABSOLC                                                                                                |
| 29 | 00093721401                                                                                                                                                                                                                                                                                                                                                                                                                                                                                                                                                                                       | METFORMIN1000 MG TABTEVA                                                                                                |
| 30 | 00093721410                                                                                                                                                                                                                                                                                                                                                                                                                                                                                                                                                                                       | METFORMIN1000 MG TABTEVA                                                                                                |
| 31 | 00591245501                                                                                                                                                                                                                                                                                                                                                                                                                                                                                                                                                                                       | METFORMIN1000 MG TABWATS                                                                                                |
| 32 | 62037067601                                                                                                                                                                                                                                                                                                                                                                                                                                                                                                                                                                                       | METFORMIN1000 MG TABWATS                                                                                                |
| 33 | 62037067610                                                                                                                                                                                                                                                                                                                                                                                                                                                                                                                                                                                       | METFORMIN1000 MG TABWATS                                                                                                |
| 34 | 68382003001                                                                                                                                                                                                                                                                                                                                                                                                                                                                                                                                                                                       | METFORMIN1000 MG TABZYDU                                                                                                |
| 35 | 68382003005                                                                                                                                                                                                                                                                                                                                                                                                                                                                                                                                                                                       | METFORMIN1000 MG TABZYDU                                                                                                |
| 36 | 68382003010                                                                                                                                                                                                                                                                                                                                                                                                                                                                                                                                                                                       | METFORMIN1000 MG TABZYDU                                                                                                |
| 37 | 00378313301                                                                                                                                                                                                                                                                                                                                                                                                                                                                                                                                                                                       | GLIPIZMETFOR5 MG-5TABMYLA                                                                                               |
| 38 | <b>Codes Used to Identify DM-Complication Hospitalizations and Emergency Visits</b>                                                                                                                                                                                                                                                                                                                                                                                                                                                                                                               |                                                                                                                         |
| 39 | California                                                                                                                                                                                                                                                                                                                                                                                                                                                                                                                                                                                        | ICD-9-CM codes 250.10, 250.11, 250.12, 250.13, 250.20, 250.21, 250.22, 250.23, 250.30, 250.31, 250.32, 250.33           |
| 40 | Ontario                                                                                                                                                                                                                                                                                                                                                                                                                                                                                                                                                                                           | ICD-10 codes E 10.0x, E 10.1x, E 10.64, E 11.0x, E 11.1x, E 11.64, E 13.0x, E 13.1x, E 13.64, E 14.0x, E 14.1x, E 14.64 |
| 41 | <b>DM-routine visits definition in Ontario</b>                                                                                                                                                                                                                                                                                                                                                                                                                                                                                                                                                    |                                                                                                                         |
| 42 | 1) visit provided by an endocrinologist, or 2) billed with a DM-preventive visit fee code [K030, K029, Q040, K045, K046], or 3) billed as a general consultation with a diagnosis code of DM by a family physician, pediatrician, or internist [ICD-9-CM code 250.xx and billing codes A005, A905, A006, A003, A004, A265, A565, A266, A263, A264, A661, A261, A262, A135, A765, A435, A136, A133, A134, A131, or A138], or 4) or having a diagnosis code for DM (ICD-9 code 250.xx) and occurring within 2 weeks of a billing claim for measurement of serum Hemoglobin A1C [OHIP fee code L093] |                                                                                                                         |
| 43 | <b>DM-routine visits definition in CCS</b>                                                                                                                                                                                                                                                                                                                                                                                                                                                                                                                                                        |                                                                                                                         |
| 44 | 1) visit provided by an endocrinologist, or 2) for DM care (ICD-9 code 250.xx)                                                                                                                                                                                                                                                                                                                                                                                                                                                                                                                    |                                                                                                                         |
| 45 |                                                                                                                                                                                                                                                                                                                                                                                                                                                                                                                                                                                                   |                                                                                                                         |
| 46 |                                                                                                                                                                                                                                                                                                                                                                                                                                                                                                                                                                                                   |                                                                                                                         |
| 47 |                                                                                                                                                                                                                                                                                                                                                                                                                                                                                                                                                                                                   |                                                                                                                         |
| 48 |                                                                                                                                                                                                                                                                                                                                                                                                                                                                                                                                                                                                   |                                                                                                                         |
| 49 |                                                                                                                                                                                                                                                                                                                                                                                                                                                                                                                                                                                                   |                                                                                                                         |
| 50 |                                                                                                                                                                                                                                                                                                                                                                                                                                                                                                                                                                                                   |                                                                                                                         |
| 51 |                                                                                                                                                                                                                                                                                                                                                                                                                                                                                                                                                                                                   |                                                                                                                         |
| 52 |                                                                                                                                                                                                                                                                                                                                                                                                                                                                                                                                                                                                   |                                                                                                                         |
| 53 |                                                                                                                                                                                                                                                                                                                                                                                                                                                                                                                                                                                                   |                                                                                                                         |
| 54 |                                                                                                                                                                                                                                                                                                                                                                                                                                                                                                                                                                                                   |                                                                                                                         |
| 55 |                                                                                                                                                                                                                                                                                                                                                                                                                                                                                                                                                                                                   |                                                                                                                         |
| 56 |                                                                                                                                                                                                                                                                                                                                                                                                                                                                                                                                                                                                   |                                                                                                                         |
| 57 |                                                                                                                                                                                                                                                                                                                                                                                                                                                                                                                                                                                                   |                                                                                                                         |
| 58 |                                                                                                                                                                                                                                                                                                                                                                                                                                                                                                                                                                                                   |                                                                                                                         |
| 59 |                                                                                                                                                                                                                                                                                                                                                                                                                                                                                                                                                                                                   |                                                                                                                         |
| 60 |                                                                                                                                                                                                                                                                                                                                                                                                                                                                                                                                                                                                   |                                                                                                                         |

**The RECORD statement – checklist of items, extended from the STROBE statement, that should be reported in observational studies using routinely collected health data.**

|                           | Item No. | STROBE items                                                                                                                                                                               | Location in manuscript where items are reported | RECORD items                                                                                                                                                                                                                                                                                                                                                                                                                                | Location in manuscript where items are reported |
|---------------------------|----------|--------------------------------------------------------------------------------------------------------------------------------------------------------------------------------------------|-------------------------------------------------|---------------------------------------------------------------------------------------------------------------------------------------------------------------------------------------------------------------------------------------------------------------------------------------------------------------------------------------------------------------------------------------------------------------------------------------------|-------------------------------------------------|
| <b>Title and abstract</b> |          |                                                                                                                                                                                            |                                                 |                                                                                                                                                                                                                                                                                                                                                                                                                                             |                                                 |
|                           | 1        | (a) Indicate the study's design with a commonly used term in the title or the abstract (b) Provide in the abstract an informative and balanced summary of what was done and what was found |                                                 | RECORD 1.1: The type of data used should be specified in the title or abstract. When possible, the name of the databases used should be included.<br><br>RECORD 1.2: If applicable, the geographic region and timeframe within which the study took place should be reported in the title or abstract.<br><br>RECORD 1.3: If linkage between databases was conducted for the study, this should be clearly stated in the title or abstract. | Title<br><br>Abstract<br><br>Abstract           |
| <b>Introduction</b>       |          |                                                                                                                                                                                            |                                                 |                                                                                                                                                                                                                                                                                                                                                                                                                                             |                                                 |
| Background rationale      | 2        | Explain the scientific background and rationale for the investigation being reported                                                                                                       | Background, page 4-5                            |                                                                                                                                                                                                                                                                                                                                                                                                                                             |                                                 |
| Objectives                | 3        | State specific objectives, including any prespecified hypotheses                                                                                                                           | Background, page 5, lines 106-110               |                                                                                                                                                                                                                                                                                                                                                                                                                                             |                                                 |
| <b>Methods</b>            |          |                                                                                                                                                                                            |                                                 |                                                                                                                                                                                                                                                                                                                                                                                                                                             |                                                 |
| Study Design              | 4        | Present key elements of study design early in the paper                                                                                                                                    | Methods, page 5, line 115                       |                                                                                                                                                                                                                                                                                                                                                                                                                                             |                                                 |
| Setting                   | 5        | Describe the setting, locations, and relevant dates, including periods of recruitment, exposure, follow-up, and data collection                                                            | Methods, page 6, lines 127-132                  |                                                                                                                                                                                                                                                                                                                                                                                                                                             |                                                 |
| Participants              | 6        | (a) <i>Cohort study</i> - Give the eligibility criteria, and the                                                                                                                           |                                                 | RECORD 6.1: The methods of study population selection (such as codes or                                                                                                                                                                                                                                                                                                                                                                     | Methods, page 6, lines 127-132 and              |

1  
2  
3  
4  
5  
6  
7  
8  
9  
10  
11  
12  
13  
14  
15  
16  
17  
18  
19  
20  
21  
22  
23  
24  
25  
26  
27  
28  
29  
30  
31  
32  
33  
34  
35  
36  
37  
38  
39  
40  
41  
42  
43  
44  
45  
46  
47  
48  
49

|                              |    |                                                                                                                                                                                                                                                                                                                                                                                                                                                                                                                                                                                                                                                             |                                   |                                                                                                                                                                                                                                                                                                                                                                                                                                                                                                                                                                                                                              |                                                                                                                                                    |
|------------------------------|----|-------------------------------------------------------------------------------------------------------------------------------------------------------------------------------------------------------------------------------------------------------------------------------------------------------------------------------------------------------------------------------------------------------------------------------------------------------------------------------------------------------------------------------------------------------------------------------------------------------------------------------------------------------------|-----------------------------------|------------------------------------------------------------------------------------------------------------------------------------------------------------------------------------------------------------------------------------------------------------------------------------------------------------------------------------------------------------------------------------------------------------------------------------------------------------------------------------------------------------------------------------------------------------------------------------------------------------------------------|----------------------------------------------------------------------------------------------------------------------------------------------------|
|                              |    | <p>sources and methods of selection of participants. Describe methods of follow-up</p> <p><i>Case-control study</i> - Give the eligibility criteria, and the sources and methods of case ascertainment and control selection. Give the rationale for the choice of cases and controls</p> <p><i>Cross-sectional study</i> - Give the eligibility criteria, and the sources and methods of selection of participants</p> <p><i>(b) Cohort study</i> - For matched studies, give matching criteria and number of exposed and unexposed</p> <p><i>Case-control study</i> - For matched studies, give matching criteria and the number of controls per case</p> |                                   | <p>algorithms used to identify subjects) should be listed in detail. If this is not possible, an explanation should be provided.</p> <p>RECORD 6.2: Any validation studies of the codes or algorithms used to select the population should be referenced. If validation was conducted for this study and not published elsewhere, detailed methods and results should be provided.</p> <p>RECORD 6.3: If the study involved linkage of databases, consider use of a flow diagram or other graphical display to demonstrate the data linkage process, including the number of individuals with linked data at each stage.</p> | <p>Appendix 1</p> <p>Reference #16</p> <p>Linkage and databases described and references provided (#14,15) in Methods, page 5-6, lines 115-124</p> |
| Variables                    | 7  | Clearly define all outcomes, exposures, predictors, potential confounders, and effect modifiers. Give diagnostic criteria, if applicable.                                                                                                                                                                                                                                                                                                                                                                                                                                                                                                                   |                                   | RECORD 7.1: A complete list of codes and algorithms used to classify exposures, outcomes, confounders, and effect modifiers should be provided. If these cannot be reported, an explanation should be provided.                                                                                                                                                                                                                                                                                                                                                                                                              | Appendix 1                                                                                                                                         |
| Data sources/<br>measurement | 8  | For each variable of interest, give sources of data and details of methods of assessment (measurement). Describe comparability of assessment methods if there is more than one group                                                                                                                                                                                                                                                                                                                                                                                                                                                                        | Methods, pages 5-7, lines 114-160 |                                                                                                                                                                                                                                                                                                                                                                                                                                                                                                                                                                                                                              |                                                                                                                                                    |
| Bias                         | 9  | Describe any efforts to address potential sources of bias                                                                                                                                                                                                                                                                                                                                                                                                                                                                                                                                                                                                   | Methods, page 8, lines 173-176    |                                                                                                                                                                                                                                                                                                                                                                                                                                                                                                                                                                                                                              |                                                                                                                                                    |
| Study size                   | 10 | Explain how the study size was                                                                                                                                                                                                                                                                                                                                                                                                                                                                                                                                                                                                                              | Methods, page 6,                  |                                                                                                                                                                                                                                                                                                                                                                                                                                                                                                                                                                                                                              |                                                                                                                                                    |

|                                                                                                                                            |                                  |            |                                                                                                                                                                                                                                                                                                                                                                                                                                                                                                                                                                      |                                                                                                                                                                                         |                                                                                                                                                                                                                                                              |
|--------------------------------------------------------------------------------------------------------------------------------------------|----------------------------------|------------|----------------------------------------------------------------------------------------------------------------------------------------------------------------------------------------------------------------------------------------------------------------------------------------------------------------------------------------------------------------------------------------------------------------------------------------------------------------------------------------------------------------------------------------------------------------------|-----------------------------------------------------------------------------------------------------------------------------------------------------------------------------------------|--------------------------------------------------------------------------------------------------------------------------------------------------------------------------------------------------------------------------------------------------------------|
|                                                                                                                                            |                                  | arrived at | lines 127-132                                                                                                                                                                                                                                                                                                                                                                                                                                                                                                                                                        |                                                                                                                                                                                         |                                                                                                                                                                                                                                                              |
| 1<br>2<br>3<br>4<br>5<br>6<br>7                                                                                                            | Quantitative variables           | 11         | Explain how quantitative variables were handled in the analyses. If applicable, describe which groupings were chosen, and why                                                                                                                                                                                                                                                                                                                                                                                                                                        | Methods, page 8, lines 165-172                                                                                                                                                          |                                                                                                                                                                                                                                                              |
| 8<br>9<br>10<br>11<br>12<br>13<br>14<br>15<br>16<br>17<br>18<br>19<br>20<br>21<br>22<br>23<br>24<br>25<br>26<br>27<br>28<br>29<br>30<br>31 | Statistical methods              | 12         | (a) Describe all statistical methods, including those used to control for confounding<br>(b) Describe any methods used to examine subgroups and interactions<br>(c) Explain how missing data were addressed<br>(d) <i>Cohort study</i> - If applicable, explain how loss to follow-up was addressed<br><i>Case-control study</i> - If applicable, explain how matching of cases and controls was addressed<br><i>Cross-sectional study</i> - If applicable, describe analytical methods taking account of sampling strategy<br>(e) Describe any sensitivity analyses | Methods, page 8, lines 165-176<br><br>Methods, page 8, lines 173-176<br><br>Methods, page 7, line 149<br><br><br><br><br><br><br><br><br><br><br><br><br>Methods, page 8, lines 173-176 |                                                                                                                                                                                                                                                              |
| 32<br>33<br>34<br>35<br>36<br>37<br>38<br>39<br>40<br>41<br>42                                                                             | Data access and cleaning methods |            | ..                                                                                                                                                                                                                                                                                                                                                                                                                                                                                                                                                                   |                                                                                                                                                                                         | RECORD 12.1: Authors should describe the extent to which the investigators had access to the database population used to create the study population.<br><br>RECORD 12.2: Authors should provide information on the data cleaning methods used in the study. |
| 43<br>44<br>45                                                                                                                             | Linkage                          |            | ..                                                                                                                                                                                                                                                                                                                                                                                                                                                                                                                                                                   |                                                                                                                                                                                         | RECORD 12.3: State whether the study included person-level, institutional-                                                                                                                                                                                   |
|                                                                                                                                            |                                  |            |                                                                                                                                                                                                                                                                                                                                                                                                                                                                                                                                                                      |                                                                                                                                                                                         | Methods, page 7, lines 163-164<br><br>Methods, page 6-7, lines 135-149<br><br>Methods, page 5-7, lines 114-149                                                                                                                                               |



|                  |    |                                                                                                                                                                                                                                                                                                                                                 |                                                                                                   |                                                                                                                                                                                                                                                                                                                    |                                |
|------------------|----|-------------------------------------------------------------------------------------------------------------------------------------------------------------------------------------------------------------------------------------------------------------------------------------------------------------------------------------------------|---------------------------------------------------------------------------------------------------|--------------------------------------------------------------------------------------------------------------------------------------------------------------------------------------------------------------------------------------------------------------------------------------------------------------------|--------------------------------|
|                  |    |                                                                                                                                                                                                                                                                                                                                                 |                                                                                                   | level, or other data linkage across two or more databases. The methods of linkage and methods of linkage quality evaluation should be provided.                                                                                                                                                                    |                                |
| <b>Results</b>   |    |                                                                                                                                                                                                                                                                                                                                                 |                                                                                                   |                                                                                                                                                                                                                                                                                                                    |                                |
| Participants     | 13 | (a) Report the numbers of individuals at each stage of the study ( <i>e.g.</i> , numbers potentially eligible, examined for eligibility, confirmed eligible, included in the study, completing follow-up, and analysed)<br>(b) Give reasons for non-participation at each stage.<br>(c) Consider use of a flow diagram                          |                                                                                                   | RECORD 13.1: Describe in detail the selection of the persons included in the study ( <i>i.e.</i> , study population selection) including filtering based on data quality, data availability and linkage. The selection of included persons can be described in the text and/or by means of the study flow diagram. | Methods, page 6, lines 127-132 |
| Descriptive data | 14 | (a) Give characteristics of study participants ( <i>e.g.</i> , demographic, clinical, social) and information on exposures and potential confounders<br>(b) Indicate the number of participants with missing data for each variable of interest<br>(c) <i>Cohort study</i> - summarise follow-up time ( <i>e.g.</i> , average and total amount) | Results, page 8-9, lines 182-188 and Table 1<br><br>Table 1<br><br>Results, page 8, lines 183-184 |                                                                                                                                                                                                                                                                                                                    |                                |
| Outcome data     | 15 | <i>Cohort study</i> - Report numbers of outcome events or summary measures over time<br><i>Case-control study</i> - Report numbers in each exposure category, or summary measures of exposure<br><i>Cross-sectional study</i> - Report numbers of outcome events or summary measures                                                            | Results, page 9, lines 189-201, Table 2, Table 3, and Figure 1                                    |                                                                                                                                                                                                                                                                                                                    |                                |
| Main results     | 16 | (a) Give unadjusted estimates                                                                                                                                                                                                                                                                                                                   | Results, page 9, lines                                                                            |                                                                                                                                                                                                                                                                                                                    |                                |



|                   |    |                                                                                                                                                                                                                                                                                                                                                                                   |                                                               |                                                                                                                                                                                                                                                                                                          |                                            |
|-------------------|----|-----------------------------------------------------------------------------------------------------------------------------------------------------------------------------------------------------------------------------------------------------------------------------------------------------------------------------------------------------------------------------------|---------------------------------------------------------------|----------------------------------------------------------------------------------------------------------------------------------------------------------------------------------------------------------------------------------------------------------------------------------------------------------|--------------------------------------------|
|                   |    | and, if applicable, confounder-adjusted estimates and their precision (e.g., 95% confidence interval). Make clear which confounders were adjusted for and why they were included<br>(b) Report category boundaries when continuous variables were categorized<br>(c) If relevant, consider translating estimates of relative risk into absolute risk for a meaningful time period | 189-201, Table 2, Table 3, and Figure 1<br><br>N/A<br><br>N/A |                                                                                                                                                                                                                                                                                                          |                                            |
| Other analyses    | 17 | Report other analyses done—e.g., analyses of subgroups and interactions, and sensitivity analyses                                                                                                                                                                                                                                                                                 | Results, page 9, lines 189-201                                |                                                                                                                                                                                                                                                                                                          |                                            |
| <b>Discussion</b> |    |                                                                                                                                                                                                                                                                                                                                                                                   |                                                               |                                                                                                                                                                                                                                                                                                          |                                            |
| Key results       | 18 | Summarise key results with reference to study objectives                                                                                                                                                                                                                                                                                                                          | Interpretation, page 10, lines 220-224                        |                                                                                                                                                                                                                                                                                                          |                                            |
| Limitations       | 19 | Discuss limitations of the study, taking into account sources of potential bias or imprecision. Discuss both direction and magnitude of any potential bias                                                                                                                                                                                                                        |                                                               | RECORD 19.1: Discuss the implications of using data that were not created or collected to answer the specific research question(s). Include discussion of misclassification bias, unmeasured confounding, missing data, and changing eligibility over time, as they pertain to the study being reported. | Interpretation, pages 12-13, lines 256-277 |
| Interpretation    | 20 | Give a cautious overall interpretation of results considering objectives, limitations, multiplicity of analyses, results from similar studies, and other relevant evidence                                                                                                                                                                                                        | Interpretation, pages 10-13, lines 220-295                    |                                                                                                                                                                                                                                                                                                          |                                            |
| Generalisability  | 21 | Discuss the generalisability (external validity) of the study results                                                                                                                                                                                                                                                                                                             | Interpretation, page 13, lines 288-295                        |                                                                                                                                                                                                                                                                                                          |                                            |

1  
2  
3  
4  
5  
6  
7  
8  
9  
10  
11  
12  
13  
14  
15  
16  
17  
18  
19  
20  
21  
22  
23  
24  
25  
26  
27  
28  
29  
30  
31  
32  
33  
34  
35  
36  
37  
38  
39  
40  
41  
42  
43  
44  
45  
46  
47  
48  
49

| Other Information                                         |    |                                                                                                                                                               |                  |                                                                                                                                                          |                                           |
|-----------------------------------------------------------|----|---------------------------------------------------------------------------------------------------------------------------------------------------------------|------------------|----------------------------------------------------------------------------------------------------------------------------------------------------------|-------------------------------------------|
| Funding                                                   | 22 | Give the source of funding and the role of the funders for the present study and, if applicable, for the original study on which the present article is based | Acknowledgements |                                                                                                                                                          |                                           |
| Accessibility of protocol, raw data, and programming code |    | ..                                                                                                                                                            |                  | RECORD 22.1: Authors should provide information on how to access any supplemental information such as the study protocol, raw data, or programming code. | Appendix 1 and Author contact information |

\*Reference: Benchimol EI, Smeeth L, Guttman A, Harron K, Moher D, Petersen I, Sørensen HT, von Elm E, Langan SM, the RECORD Working Committee. The REporting of studies Conducted using Observational Routinely-collected health Data (RECORD) Statement. *PLoS Medicine* 2015; in press.

\*Checklist is protected under Creative Commons Attribution ([CC BY](#)) license.

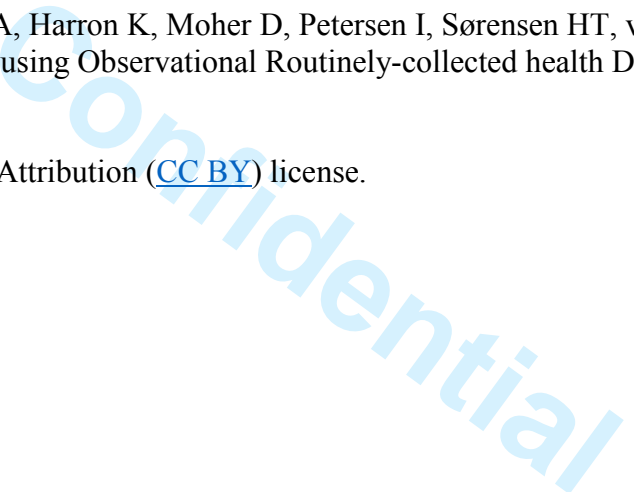

Supplement: supp_4.4.E729_2016-0075_original_submission.pdf [file supp_4.4.E729_2016-0075_original_submission.pdf]
