# Supplementary material
Source: PubMed Central journal article supplement (PMC5173459)
Supplement: supp_4.4.E729_2016-0075-1-at.pdf [file supp_4.4.E729_2016-0075-1-at.pdf]

## Appendix 1 (as supplied by the authors): Codes Used for Analysis

| Codes Used to Identify Use of Insulin |                                         |
|---------------------------------------|-----------------------------------------|
| NDC Number                            | Generic Name                            |
| 00169330312                           | insulin aspart, recombinant             |
| 00169633910                           | insulin aspart, recombinant             |
| 00169750111                           | insulin aspart, recombinant             |
| 54868277700                           | insulin aspart, recombinant             |
| 54868605400                           | insulin aspart, recombinant             |
| 00169368213                           | insulin aspart/insulin aspart protamine |
| 00169368512                           | insulin aspart/insulin aspart protamine |
| 00169369619                           | insulin aspart/insulin aspart protamine |
| 54868520100                           | insulin aspart/insulin aspart protamine |
| 54868532700                           | insulin aspart/insulin aspart protamine |
| 00169368712                           | insulin detemir                         |
| 00169643910                           | insulin detemir                         |
| 54868011200                           | insulin detemir                         |
| 54868588300                           | insulin detemir                         |
| 00088221905                           | insulin glargine, recombinant           |
| 00088222033                           | insulin glargine, recombinant           |
| 00088222052                           | insulin glargine, recombinant           |
| 00088222060                           | insulin glargine, recombinant           |
| 49999099410                           | insulin glargine, recombinant           |
| 54569560500                           | insulin glargine, recombinant           |
| 54868462600                           | insulin glargine, recombinant           |
| 54868576500                           | insulin glargine, recombinant           |
| 55045368501                           | insulin glargine, recombinant           |
| 68115083910                           | insulin glargine, recombinant           |
| 00088250033                           | insulin glulisine                       |
| 00088250052                           | insulin glulisine                       |
| 00088250205                           | insulin glulisine                       |
| 00002831501                           | insulin human isophane (nph)            |
| 00002831517                           | insulin human isophane (nph)            |
| 00002831591                           | insulin human isophane (nph)            |
| 00002831759                           | insulin human isophane (nph)            |
| 00002873059                           | insulin human isophane (nph)            |
| 00003183410                           | insulin human isophane (nph)            |
| 00169004571                           | insulin human isophane (nph)            |
| 00169022201                           | insulin human isophane (nph)            |
| 00169033301                           | insulin human isophane (nph)            |
| 00169183411                           | insulin human isophane (nph)            |
| 00169183417                           | insulin human isophane (nph)            |
| 00169183418                           | insulin human isophane (nph)            |
| 00169231421                           | insulin human isophane (nph)            |
| 00169347418                           | insulin human isophane (nph)            |

Appendix to: Kaiser SV, Sundaram V, Cohen E, et al. Health care for children with diabetes mellitus from low-income families in Ontario and California: a population-based cohort study. *CMAJ Open* 2016. DOI: 10.9778/cmajo.20160075. Copyright ©2016 Joule Inc. or its licensors

|             |                                                    |
|-------------|----------------------------------------------------|
| 00403296118 | insulin human isophane (nph)                       |
| 54569231800 | insulin human isophane (nph)                       |
| 54569231801 | insulin human isophane (nph)                       |
| 54569383500 | insulin human isophane (nph)                       |
| 54569383501 | insulin human isophane (nph)                       |
| 54569383502 | insulin human isophane (nph)                       |
| 54868142901 | insulin human isophane (nph)                       |
| 54868238001 | insulin human isophane (nph)                       |
| 58016478801 | insulin human isophane (nph)                       |
| 59060183402 | insulin human isophane (nph)                       |
| 59060231404 | insulin human isophane (nph)                       |
| 68115072905 | insulin human isophane (nph)                       |
| 68258898501 | insulin human isophane (nph)                       |
| 68258898601 | insulin human isophane (nph)                       |
| 00002871501 | insulin human isophane (nph)/insulin human regular |
| 00002871591 | insulin human isophane (nph)/insulin human regular |
| 00002871759 | insulin human isophane (nph)/insulin human regular |
| 00002877059 | insulin human isophane (nph)/insulin human regular |
| 00002951501 | insulin human isophane (nph)/insulin human regular |
| 00003183710 | insulin human isophane (nph)/insulin human regular |
| 00169001771 | insulin human isophane (nph)/insulin human regular |
| 00169183711 | insulin human isophane (nph)/insulin human regular |
| 00169183717 | insulin human isophane (nph)/insulin human regular |
| 00169183718 | insulin human isophane (nph)/insulin human regular |
| 00169231721 | insulin human isophane (nph)/insulin human regular |
| 00169347718 | insulin human isophane (nph)/insulin human regular |
| 49999099310 | insulin human isophane (nph)/insulin human regular |
| 54569291800 | insulin human isophane (nph)/insulin human regular |
| 54569291801 | insulin human isophane (nph)/insulin human regular |
| 54569291802 | insulin human isophane (nph)/insulin human regular |
| 54569346700 | insulin human isophane (nph)/insulin human regular |
| 54569346701 | insulin human isophane (nph)/insulin human regular |
| 54868274600 | insulin human isophane (nph)/insulin human regular |
| 54868347400 | insulin human isophane (nph)/insulin human regular |
| 54868582400 | insulin human isophane (nph)/insulin human regular |
| 55045350801 | insulin human isophane (nph)/insulin human regular |
| 55045362401 | insulin human isophane (nph)/insulin human regular |
| 59060183702 | insulin human isophane (nph)/insulin human regular |
| 59060231704 | insulin human isophane (nph)/insulin human regular |
| 00002821501 | insulin human regular                              |
| 00002821517 | insulin human regular                              |
| 00002821591 | insulin human regular                              |
| 00002821759 | insulin human regular                              |
| 00002850101 | insulin human regular                              |
| 00003183310 | insulin human regular                              |

Appendix to: Kaiser SV, Sundaram V, Cohen E, et al. Health care for children with diabetes mellitus from low-income families in Ontario and California: a population-based cohort study. *CMAJ Open* 2016. DOI: 10.9778/cmajo.20160075. Copyright ©2016 Joule Inc. or its licensors

|             |                                         |
|-------------|-----------------------------------------|
| 00003183315 | insulin human regular                   |
| 00003183415 | insulin human regular                   |
| 00003183715 | insulin human regular                   |
| 00169004471 | insulin human regular                   |
| 00169183311 | insulin human regular                   |
| 00169183317 | insulin human regular                   |
| 00169183318 | insulin human regular                   |
| 00169231321 | insulin human regular                   |
| 00169347318 | insulin human regular                   |
| 00403344918 | insulin human regular                   |
| 23490668700 | insulin human regular                   |
| 54569231900 | insulin human regular                   |
| 54569231901 | insulin human regular                   |
| 54569383300 | insulin human regular                   |
| 54569383301 | insulin human regular                   |
| 54569383302 | insulin human regular                   |
| 54868359800 | insulin human regular                   |
| 54868361900 | insulin human regular                   |
| 55045350601 | insulin human regular                   |
| 59060183302 | insulin human regular                   |
| 68115070905 | insulin human regular                   |
| 68115072810 | insulin human regular                   |
| 00002821601 | insulin human regular, buffered         |
| 00169007011 | insulin human regular, buffered         |
| 00002751001 | insulin lispro, recombinant             |
| 00002751017 | insulin lispro, recombinant             |
| 00002751559 | insulin lispro, recombinant             |
| 00002751659 | insulin lispro, recombinant             |
| 00002872559 | insulin lispro, recombinant             |
| 00002879959 | insulin lispro, recombinant             |
| 35356010200 | insulin lispro, recombinant             |
| 54868510800 | insulin lispro, recombinant             |
| 54868583600 | insulin lispro, recombinant             |
| 54868589900 | insulin lispro, recombinant             |
| 66143751005 | insulin lispro, recombinant             |
| 68115074610 | insulin lispro, recombinant             |
| 00002751101 | insulin lispro/insulin lispro protamine |
| 00002751201 | insulin lispro/insulin lispro protamine |
| 00002879359 | insulin lispro/insulin lispro protamine |
| 00002879459 | insulin lispro/insulin lispro protamine |
| 00002879759 | insulin lispro/insulin lispro protamine |
| 00002879859 | insulin lispro/insulin lispro protamine |
| 54569532100 | insulin lispro/insulin lispro protamine |
| 54868438100 | insulin lispro/insulin lispro protamine |
| 00169011101 | insulin, human regular buffered         |

Appendix to: Kaiser SV, Sundaram V, Cohen E, et al. Health care for children with diabetes mellitus from low-income families in Ontario and California: a population-based cohort study. *CMAJ Open* 2016. DOI: 10.9778/cmajo.20160075. Copyright ©2016 Joule Inc. or its licensors

|                                                      |                                                                                                      |
|------------------------------------------------------|------------------------------------------------------------------------------------------------------|
| 00169750111                                          | NOVOLOG 100/MLVIANOVN                                                                                |
| 08290328438                                          | INSULIN SYRI31GX5/SYNBD D                                                                            |
| 08290328440                                          | INSULIN SYRI31GX5/SYNBD D                                                                            |
| <b>HCPCS code</b>                                    | <b>Description</b>                                                                                   |
| X6366                                                | INSULIN INJ/BEEF/PORK/PANCREAS                                                                       |
| S8490                                                | Insulin syringes (100 syringes, any size)                                                            |
| A4230                                                | Infusion set for external insulin pump, non-needle cannula type                                      |
| A4231                                                | Infusion set for external insulin pump, needle type                                                  |
| A4232                                                | Syringe with needle for external insulin pump, sterile, 3cc                                          |
| A9274                                                | External ambulatory insulin delivery system, disposable, each, includes all supplies and accessories |
| E0784                                                | External ambulatory infusion pump, insulin                                                           |
| J1815                                                | Injection, insulin, per 5 units                                                                      |
| J1817                                                | Insulin for administration through DME (i.e., insulin pump) per 50 units                             |
| S5550                                                | Insulin, rapid onset, 5 units                                                                        |
| S5551                                                | Insulin, most rapid onset (Lispro or Aspart); 5 units                                                |
| S5552                                                | Insulin, intermediate acting (NPH or LENTE); 5 units                                                 |
| S5553                                                | Insulin, long acting; 5 units                                                                        |
| S5560                                                | Insulin delivery device, reusable pen; 1.5 ml size                                                   |
| S5561                                                | Insulin delivery device, reusable pen; 3 ml size                                                     |
| S5565                                                | Insulin cartridge for use in insulin delivery device other than pump; 150 units                      |
| S5566                                                | Insulin cartridge for use in insulin delivery device other than pump; 300 units                      |
| S5570                                                | Insulin delivery device, disposable pen (including insulin); 1.5 ml size                             |
| S5571                                                | Insulin delivery device, disposable pen (including insulin); 3 ml size                               |
| S9145                                                | Insulin pump initiation, instruction in initial use of pump (pump not included)                      |
| <b>Codes Used to Identify Use of an Insulin Pump</b> |                                                                                                      |
| <b>NDC Number</b>                                    | <b>Trade name</b>                                                                                    |
| 61058602833                                          | DELTEC COZMO CLEO INFUSION SET                                                                       |
| 61058602834                                          |                                                                                                      |
| 61058602835                                          |                                                                                                      |
| 61058602839                                          |                                                                                                      |
| 61058602840                                          |                                                                                                      |
| 61058602841                                          |                                                                                                      |
| 65781439602                                          | INSET 30 INFUSION SET                                                                                |
| 65781036102                                          | INSET INFUSION SET                                                                                   |
| 65781136102                                          |                                                                                                      |
| 8521307010                                           | INSULIN PUMP RESERVOIR                                                                               |
| 76300050001                                          | MEDTRONIC REMOTE CONTROL                                                                             |
| 76300039010                                          | MINIMED                                                                                              |
| 76300039110                                          |                                                                                                      |
| 76300039210                                          |                                                                                                      |
| 76300039310                                          |                                                                                                      |
| 76300039501                                          |                                                                                                      |
| 76300039610                                          |                                                                                                      |

Appendix to: Kaiser SV, Sundaram V, Cohen E, et al. Health care for children with diabetes mellitus from low-income families in Ontario and California: a population-based cohort study. *CMAJ Open* 2016. DOI: 10.9778/cmajo.20160075. Copyright ©2016 Joule Inc. or its licensors

|             |                               |
|-------------|-------------------------------|
| 76300039710 |                               |
| 76300039810 |                               |
| 76300039910 |                               |
| 76300010310 | MINIMED RESERVOIR             |
| 76300010324 |                               |
| 76300092110 | MIO INFUSION SET              |
| 76300092310 |                               |
| 76300092510 |                               |
| 76300094110 |                               |
| 76300094310 |                               |
| 76300094510 |                               |
| 76300096510 |                               |
| 76300097510 |                               |
| 76300032610 | PARADIGM                      |
| 76300032620 |                               |
| 76300033210 |                               |
| 76300031221 | PARADIGM INFUSION             |
| 76300031222 |                               |
| 76300012201 | PARADIGM INSULIN PUMP PATHWAY |
| 76300022201 |                               |
| 76300052201 |                               |
| 8290333200  | PARADIGM LINK BLOOD GLUCOSE   |
| 8290333201  |                               |
| 8290333202  |                               |
| 8290333203  |                               |
| 76300001701 | PARADIGM REAL-TIME            |
| 76300050301 | PARADIGM REMOTE CONTROL       |
| 76300036810 | PARADIGM SILHOUETTE           |
| 76300038110 |                               |
| 76300038210 |                               |
| 76300038310 |                               |
| 76300038410 |                               |
| 76300031512 | QUICK RELEASE SOFT TEFLON     |
| 76300031612 |                               |
| 8189609000  | QUICK-CHECK FILM              |
| 57565006090 |                               |
| 8189608000  | QUICK-CHECK II                |
| 57565006080 |                               |
| 8189607000  | QUICK-CHECK ONE               |
| 57565006070 |                               |

Appendix to: Kaiser SV, Sundaram V, Cohen E, et al. Health care for children with diabetes mellitus from low-income families in Ontario and California: a population-based cohort study. *CMAJ Open* 2016. DOI: 10.9778/cmajo.20160075. Copyright ©2016 Joule Inc. or its licensors

|             |                    |
|-------------|--------------------|
| 76300038610 | QUICK-SET PARADIGM |
| 76300038710 |                    |
| 76300039410 |                    |
| 76300036910 | SILHOUETTE         |
| 76300037010 |                    |
| 76300037110 |                    |
| 76300037205 |                    |
| 76300037310 |                    |
| 76300037405 |                    |
| 76300037410 |                    |
| 76300037710 |                    |
| 76300037810 |                    |
| 76300037905 |                    |
| 76300037910 |                    |
| 76300038005 |                    |
| 76300038010 |                    |
| 76300038501 | SIL-SERTER         |
| 76300000211 | SOF-SENSOR         |
| 76300000214 |                    |
| 76300030001 | SOF-SERTER         |
| 76300011124 | SOF-SET            |
| 76300011224 |                    |
| 76300031712 |                    |
| 76300031812 |                    |
| 76300032412 |                    |
| 76300032512 |                    |
| 76300032012 | SOF-SET MICRO      |
| 76300032112 |                    |
| 50924058001 | SOFT TOUCH         |
| 50924058510 |                    |
| 50924093720 |                    |
| 50924095120 |                    |
| 75537000580 |                    |
| 75537000585 |                    |
| 75537000937 |                    |
| 75537009512 |                    |
| 76300084010 | SURE-T             |
| 76300087210 |                    |
| 76300086210 | SURE-T PARADIGM    |
| 76300086410 |                    |

Appendix to: Kaiser SV, Sundaram V, Cohen E, et al. Health care for children with diabetes mellitus from low-income families in Ontario and California: a population-based cohort study. *CMAJ Open* 2016. DOI: 10.9778/cmajo.20160075. Copyright ©2016 Joule Inc. or its licensors

|                                                                |                                                                                                                                                                                                                                        |
|----------------------------------------------------------------|----------------------------------------------------------------------------------------------------------------------------------------------------------------------------------------------------------------------------------------|
| 76300086610                                                    |                                                                                                                                                                                                                                        |
| 76300087410                                                    |                                                                                                                                                                                                                                        |
| 76300087610                                                    |                                                                                                                                                                                                                                        |
| 76300088610                                                    |                                                                                                                                                                                                                                        |
| <b>HCPCS Codes</b>                                             | <b>Description</b>                                                                                                                                                                                                                     |
| A4221                                                          | Supplies for maintenance of drug infusion catheter, per week (list drug separately)                                                                                                                                                    |
| A4222                                                          | Infusion supplies for external drug infusion pump, per cassette or bag (list drugs separately)                                                                                                                                         |
| A4230                                                          | Infusion set for external insulin pump, non-needle cannula type                                                                                                                                                                        |
| A4231                                                          | Infusion set for external insulin pump, needle type                                                                                                                                                                                    |
| A4232                                                          | Syringe with needle for external insulin pump, sterile, 3cc                                                                                                                                                                            |
| A4601                                                          | Lithium ion battery for non-prosthetic use, replacement                                                                                                                                                                                |
| A6257                                                          | Transparent film, sterile, 16 sq. in. or less, each dressing                                                                                                                                                                           |
| A6258                                                          | Transparent film, sterile, more than 16 sq. in. but less than or equal to 48 sq. in., each dressing                                                                                                                                    |
| A6259                                                          | Transparent film, sterile, more than 48 sq. in., each dressing                                                                                                                                                                         |
| A9274                                                          | External ambulatory insulin delivery system, disposable, each, includes all supplies and accessories                                                                                                                                   |
| E0784                                                          | External ambulatory infusion pump, insulin                                                                                                                                                                                             |
| J1817                                                          | Insulin for administration through DME (i.e., insulin pump) per 50 units                                                                                                                                                               |
| K0601                                                          | Replacement battery for external infusion pump                                                                                                                                                                                         |
| K0602                                                          | Replacement battery for external infusion pump                                                                                                                                                                                         |
| K0603                                                          | Replacement battery for external infusion pump                                                                                                                                                                                         |
| K0604                                                          | Replacement battery for external infusion pump                                                                                                                                                                                         |
| K0605                                                          | Replacement battery for external infusion pump                                                                                                                                                                                         |
| K0552                                                          | Supplies for external drug infusion pump, syringe type cartridge, sterile, each                                                                                                                                                        |
| S9145                                                          | Insulin pump initiation, instruction in initial use of pump (pump not included)                                                                                                                                                        |
| S9353                                                          | Home infusion therapy, continuous insulin infusion therapy; administrative services, professional pharmacy services, care coordination, and all necessary supplies and equipment (drugs and nursing visits coded separately), per diem |
| <b>Codes Used to Identify Oral Hypoglycemic Use in Ontario</b> |                                                                                                                                                                                                                                        |
| Drug Identification Code                                       | Generic drug name                                                                                                                                                                                                                      |
| 00009806                                                       | METFORMIN HCL                                                                                                                                                                                                                          |
| 00012556                                                       | CHLORPROPAMIDE                                                                                                                                                                                                                         |
| 00012564                                                       | CHLORPROPAMIDE                                                                                                                                                                                                                         |
| 00012599                                                       | GLYBURIDE                                                                                                                                                                                                                              |
| 00012602                                                       | TOLBUTAMIDE                                                                                                                                                                                                                            |
| 00012610                                                       | TOLBUTAMIDE                                                                                                                                                                                                                            |
| 00013730                                                       | CHLORPROPAMIDE                                                                                                                                                                                                                         |
| 00013889                                                       | TOLBUTAMIDE                                                                                                                                                                                                                            |
| 00015598                                                       | ACETOHEXAMIDE                                                                                                                                                                                                                          |
| 00017167                                                       | TOLBUTAMIDE                                                                                                                                                                                                                            |
| 00021350                                                       | CHLORPROPAMIDE                                                                                                                                                                                                                         |
| 00021849                                                       | TOLBUTAMIDE                                                                                                                                                                                                                            |
| 00024708                                                       | CHLORPROPAMIDE                                                                                                                                                                                                                         |
| 00024716                                                       | CHLORPROPAMIDE                                                                                                                                                                                                                         |
| 00093033                                                       | TOLBUTAMIDE                                                                                                                                                                                                                            |

Appendix to: Kaiser SV, Sundaram V, Cohen E, et al. Health care for children with diabetes mellitus from low-income families in Ontario and California: a population-based cohort study. *CMAJ Open* 2016. DOI: 10.9778/cmajo.20160075. Copyright ©2016 Joule Inc. or its licensors

|          |                |
|----------|----------------|
| 00156663 | TOLBUTAMIDE    |
| 00156728 | CHLORPROPAMIDE |
| 00178543 | TOLBUTAMIDE    |
| 00193662 | GLYBURIDE      |
| 00209872 | TOLBUTAMIDE    |
| 00209937 | CHLORPROPAMIDE |
| 00237000 | TOLBUTAMIDE    |
| 00244449 | GLYBURIDE      |
| 00247111 | CHLORPROPAMIDE |
| 00271330 | CHLORPROPAMIDE |
| 00309265 | CHLORPROPAMIDE |
| 00312711 | CHLORPROPAMIDE |
| 00312762 | TOLBUTAMIDE    |
| 00314552 | METFORMIN HCL  |
| 00314730 | TOLBUTAMIDE    |
| 00324361 | TOLBUTAMIDE    |
| 00377937 | CHLORPROPAMIDE |
| 00379948 | CHLORPROPAMIDE |
| 00399302 | CHLORPROPAMIDE |
| 00420336 | GLYBURIDE      |
| 00430986 | CHLORPROPAMIDE |
| 00431168 | TOLBUTAMIDE    |
| 00438111 | GLYBURIDE      |
| 00454753 | GLYBURIDE      |
| 00480290 | GLYBURIDE      |
| 00480304 | GLYBURIDE      |
| 00502391 | TOLBUTAMIDE    |
| 00584932 | CHLORPROPAMIDE |
| 00586773 | CHLORPROPAMIDE |
| 00720933 | GLYBURIDE      |
| 00720941 | GLYBURIDE      |
| 00765966 | GLICLAZIDE     |
| 00765996 | GLICLAZIDE     |
| 00808733 | GLYBURIDE      |
| 00808741 | GLYBURIDE      |
| 00813176 | GLICLAZIDE     |
| 00913662 | GLYBURIDE      |
| 00913670 | GLYBURIDE      |
| 00913689 | GLYBURIDE      |
| 00990329 | METFORMIN HCL  |
| 01900927 | GLYBURIDE      |
| 01900935 | GLYBURIDE      |
| 01913654 | GLYBURIDE      |
| 01913662 | GLYBURIDE      |
| 01913670 | GLYBURIDE      |
| 01913689 | GLYBURIDE      |

Appendix to: Kaiser SV, Sundaram V, Cohen E, et al. Health care for children with diabetes mellitus from low-income families in Ontario and California: a population-based cohort study. *CMAJ Open* 2016. DOI: 10.9778/cmajo.20160075. Copyright ©2016 Joule Inc. or its licensors



|          |               |
|----------|---------------|
| 01959352 | GLYBURIDE     |
| 01959360 | GLYBURIDE     |
| 01987534 | GLYBURIDE     |
| 01987542 | TOLBUTAMIDE   |
| 01987828 | TOLBUTAMIDE   |
| 01987836 | GLYBURIDE     |
| 01990837 | GLYBURIDE     |
| 01990845 | GLYBURIDE     |
| 02020734 | GLYBURIDE     |
| 02020742 | GLYBURIDE     |
| 02045710 | METFORMIN HCL |
| 02084341 | GLYBURIDE     |
| 02085887 | GLYBURIDE     |
| 02099233 | METFORMIN HCL |
| 02147521 | GLYBURIDE     |
| 02147548 | GLYBURIDE     |
| 02148765 | METFORMIN     |
| 02155850 | GLICLAZIDE    |
| 02162822 | METFORMIN HCL |
| 02162849 | METFORMIN HCL |
| 02167786 | METFORMIN HCL |
| 02188902 | METFORMIN HCL |
| 02190885 | ACARBOSE      |
| 02190893 | ACARBOSE      |
| 02220628 | METFORMIN HCL |
| 02223562 | METFORMIN HCL |
| 02224550 | GLYBURIDE     |
| 02224569 | GLYBURIDE     |
| 02224771 | TOLBUTAMIDE   |
| 02224798 | TOLBUTAMIDE   |
| 02226804 | GLYBURIDE     |
| 02226812 | GLYBURIDE     |
| 02228920 | GLYBURIDE     |
| 02228939 | GLYBURIDE     |
| 02229516 | METFORMIN HCL |
| 02229517 | METFORMIN HCL |
| 02229519 | GLICLAZIDE    |
| 02229595 | GLYBURIDE     |
| 02229596 | GLYBURIDE     |
| 02229656 | METFORMIN     |
| 02229785 | METFORMIN HCL |
| 02229994 | METFORMIN HCL |
| 02230026 | METFORMIN HCL |
| 02230027 | METFORMIN HCL |
| 02230036 | GLYBURIDE     |
| 02230037 | GLYBURIDE     |

Appendix to: Kaiser SV, Sundaram V, Cohen E, et al. Health care for children with diabetes mellitus from low-income families in Ontario and California: a population-based cohort study. *CMAJ Open* 2016. DOI: 10.9778/cmajo.20160075. Copyright ©2016 Joule Inc. or its licensors

|          |                       |
|----------|-----------------------|
| 02230443 | GLIPIZIDE             |
| 02230444 | GLIPIZIDE             |
| 02230475 | METFORMIN HCL         |
| 02230670 | METFORMIN HCL         |
| 02230671 | METFORMIN HCL         |
| 02231058 | METFORMIN HCL         |
| 02231095 | TROGLITAZONE          |
| 02231096 | TROGLITAZONE          |
| 02231389 | METFORMIN HCL         |
| 02233999 | METFORMIN HCL         |
| 02234513 | GLYBURIDE             |
| 02234514 | GLYBURIDE             |
| 02236543 | GLYBURIDE             |
| 02236548 | GLYBURIDE             |
| 02236733 | GLYBURIDE             |
| 02236734 | GLYBURIDE             |
| 02236985 | TROGLITAZONE          |
| 02236986 | TROGLITAZONE          |
| 02237531 | TROGLITAZONE          |
| 02238103 | GLICLAZIDE            |
| 02238698 | TROGLITAZONE          |
| 02238827 | METFORMIN HCL         |
| 02239081 | METFORMIN HCL         |
| 02239214 | METFORMIN HCL         |
| 02239924 | REPAGLINIDE           |
| 02239925 | REPAGLINIDE           |
| 02239926 | REPAGLINIDE           |
| 02241111 | ROSIGLITAZONE MALEATE |
| 02241112 | ROSIGLITAZONE MALEATE |
| 02241113 | ROSIGLITAZONE MALEATE |
| 02241114 | ROSIGLITAZONE MALEATE |
| 02242095 | GLYBURIDE             |
| 02242096 | GLYBURIDE             |
| 02242572 | PIOGLITAZONE HCL      |
| 02242573 | PIOGLITAZONE HCL      |
| 02242574 | PIOGLITAZONE HCL      |
| 02242589 | METFORMIN HCL         |
| 02242726 | METFORMIN HCL         |
| 02242783 | METFORMIN HCL         |
| 02242793 | METFORMIN HCL         |
| 02242794 | METFORMIN HCL         |
| 02242931 | METFORMIN HCL         |
| 02242974 | METFORMIN HCL         |
| 02242987 | GLICLAZIDE            |
| 02245247 | GLICLAZIDE            |
| 02245272 | GLIMEPIRIDE           |

Appendix to: Kaiser SV, Sundaram V, Cohen E, et al. Health care for children with diabetes mellitus from low-income families in Ontario and California: a population-based cohort study. *CMAJ Open* 2016. DOI: 10.9778/cmajo.20160075. Copyright ©2016 Joule Inc. or its licensors

|          |                                       |
|----------|---------------------------------------|
| 02245273 | GLIMEPIRIDE                           |
| 02245274 | GLIMEPIRIDE                           |
| 02245438 | NATEGLINIDE                           |
| 02245439 | NATEGLINIDE                           |
| 02245440 | NATEGLINIDE                           |
| 02246613 | METFORMIN HCL                         |
| 02246614 | METFORMIN HCL                         |
| 02246820 | METFORMIN HCL                         |
| 02246821 | METFORMIN HCL                         |
| 02246964 | METFORMIN HCL                         |
| 02246965 | METFORMIN HCL                         |
| 02247085 | METFORMIN HCL & ROSIGLITAZONE MALEATE |
| 02247086 | METFORMIN HCL & ROSIGLITAZONE MALEATE |
| 02247087 | METFORMIN HCL & ROSIGLITAZONE MALEATE |
| 02248008 | GLYBURIDE                             |
| 02248009 | GLYBURIDE                             |
| 02248210 | GLICLAZIDE                            |
| 02248440 | METFORMIN HCL & ROSIGLITAZONE MALEATE |
| 02248441 | METFORMIN HCL & ROSIGLITAZONE MALEATE |
| 02248453 | GLICLAZIDE                            |
| 02252945 | METFORMIN HCL                         |
| 02252953 | METFORMIN HCL                         |
| 02254719 | GLICLAZIDE                            |
| 02257726 | METFORMIN HCL                         |
| 02257734 | METFORMIN HCL                         |
| 02258781 | GLIMEPIRIDE & ROSIGLITAZONE MALEATE   |
| 02258803 | GLIMEPIRIDE & ROSIGLITAZONE MALEATE   |
| 02258811 | GLIMEPIRIDE & ROSIGLITAZONE MALEATE   |
| 02265575 | METFORMIN HCL                         |
| 02265583 | METFORMIN HCL                         |
| 02268493 | METFORMIN HCL                         |
| 02268507 | METFORMIN HCL                         |
| 02269031 | METFORMIN HCL                         |
| 02269058 | METFORMIN HCL                         |
| 02269589 | GLIMEPIRIDE                           |
| 02269597 | GLIMEPIRIDE                           |
| 02269600 | GLIMEPIRIDE                           |
| 02269619 | GLIMEPIRIDE                           |
| 02273101 | GLIMEPIRIDE                           |
| 02273128 | GLIMEPIRIDE                           |
| 02273136 | GLIMEPIRIDE                           |
| 02273756 | GLIMEPIRIDE                           |
| 02273764 | GLIMEPIRIDE                           |
| 02273772 | GLIMEPIRIDE                           |
| 02274248 | GLIMEPIRIDE                           |
| 02274256 | GLIMEPIRIDE                           |

Appendix to: Kaiser SV, Sundaram V, Cohen E, et al. Health care for children with diabetes mellitus from low-income families in Ontario and California: a population-based cohort study. *CMAJ Open* 2016. DOI: 10.9778/cmajo.20160075. Copyright ©2016 Joule Inc. or its licensors

|          |                       |
|----------|-----------------------|
| 02274264 | GLIMEPIRIDE           |
| 02274272 | GLIMEPIRIDE           |
| 02274914 | PIOGLITAZONE HCL      |
| 02274922 | PIOGLITAZONE HCL      |
| 02274930 | PIOGLITAZONE HCL      |
| 02279061 | GLIMEPIRIDE           |
| 02279088 | GLIMEPIRIDE           |
| 02279126 | GLIMEPIRIDE           |
| 02284545 | GLIMEPIRIDE           |
| 02284553 | GLIMEPIRIDE           |
| 02284782 | METFORMIN HCL         |
| 02284790 | METFORMIN HCL         |
| 02286149 | GLYBURIDE             |
| 02286157 | GLYBURIDE             |
| 02287072 | GLICLAZIDE            |
| 02293862 | GLICLAZIDE            |
| 02294400 | GLICLAZIDE            |
| 02295377 | GLIMEPIRIDE           |
| 02295385 | GLIMEPIRIDE           |
| 02295393 | GLIMEPIRIDE           |
| 02297795 | GLICLAZIDE            |
| 02297906 | PIOGLITAZONE HCL      |
| 02297914 | PIOGLITAZONE HCL      |
| 02297922 | PIOGLITAZONE HCL      |
| 02298279 | PIOGLITAZONE HCL      |
| 02298287 | PIOGLITAZONE HCL      |
| 02298295 | PIOGLITAZONE HCL      |
| 02300451 | METFORMIN HCL         |
| 02301423 | PIOGLITAZONE HCL      |
| 02301431 | PIOGLITAZONE HCL      |
| 02301458 | PIOGLITAZONE HCL      |
| 02302861 | PIOGLITAZONE HCL      |
| 02302888 | PIOGLITAZONE HCL      |
| 02302896 | PIOGLITAZONE HCL      |
| 02302942 | PIOGLITAZONE HCL      |
| 02302950 | PIOGLITAZONE HCL      |
| 02302977 | PIOGLITAZONE HCL      |
| 02303124 | PIOGLITAZONE HCL      |
| 02303132 | PIOGLITAZONE HCL      |
| 02303140 | PIOGLITAZONE HCL      |
| 02303442 | PIOGLITAZONE HCL      |
| 02303450 | PIOGLITAZONE HCL      |
| 02303469 | PIOGLITAZONE HCL      |
| 02303922 | SITAGLIPTIN PHOSPHATE |
| 02305062 | METFORMIN HCL         |
| 02306166 | ROSIGLITAZONE MALEATE |

Appendix to: Kaiser SV, Sundaram V, Cohen E, et al. Health care for children with diabetes mellitus from low-income families in Ontario and California: a population-based cohort study. *CMAJ Open* 2016. DOI: 10.9778/cmajo.20160075. Copyright ©2016 Joule Inc. or its licensors

|          |                                       |
|----------|---------------------------------------|
| 02306174 | ROSIGLITAZONE MALEATE                 |
| 02306182 | ROSIGLITAZONE MALEATE                 |
| 02307634 | PIOGLITAZONE HCL                      |
| 02307642 | PIOGLITAZONE HCL                      |
| 02307650 | PIOGLITAZONE HCL                      |
| 02307669 | PIOGLITAZONE HCL                      |
| 02307677 | PIOGLITAZONE HCL                      |
| 02307723 | PIOGLITAZONE HCL                      |
| 02312050 | PIOGLITAZONE HCL                      |
| 02312069 | PIOGLITAZONE HCL                      |
| 02312077 | PIOGLITAZONE HCL                      |
| 02313596 | GLIMEPIRIDE                           |
| 02314894 | METFORMIN HCL                         |
| 02314908 | METFORMIN HCL                         |
| 02316544 | GLYBURIDE                             |
| 02320754 | PIOGLITAZONE HCL                      |
| 02320762 | PIOGLITAZONE HCL                      |
| 02320770 | PIOGLITAZONE HCL                      |
| 02321475 | REPAGLINIDE HCL                       |
| 02321483 | REPAGLINIDE HCL                       |
| 02321491 | REPAGLINIDE HCL                       |
| 02326329 | ROSIGLITAZONE MALEATE                 |
| 02326337 | ROSIGLITAZONE MALEATE                 |
| 02326345 | ROSIGLITAZONE MALEATE                 |
| 02326477 | PIOGLITAZONE HCL                      |
| 02326485 | PIOGLITAZONE HCL                      |
| 02326493 | PIOGLITAZONE HCL                      |
| 02331519 | METFORMIN HCL                         |
| 02331527 | METFORMIN HCL                         |
| 02333554 | SAXAGLIPTIN HCL                       |
| 02333856 | METFORMIN HCL & SITAGLIPTIN PHOSPHATE |
| 02333864 | METFORMIN HCL & SITAGLIPTIN PHOSPHATE |
| 02333872 | METFORMIN HCL & SITAGLIPTIN PHOSPHATE |
| 02334437 | METFORMIN HCL                         |
| 02334445 | METFORMIN HCL                         |
| 02334674 | PIOGLITAZONE HCL                      |
| 02334682 | PIOGLITAZONE HCL                      |
| 02334690 | PIOGLITAZONE HCL                      |
| 02336316 | GLICLAZIDE                            |
| 02339110 | METFORMIN HCL                         |
| 02339129 | METFORMIN HCL                         |
| 02339587 | PIOGLITAZONE HCL                      |
| 02339595 | PIOGLITAZONE HCL                      |
| 02339676 | PIOGLITAZONE HCL                      |
| 02339684 | PIOGLITAZONE HCL                      |
| 02339692 | PIOGLITAZONE HCL                      |

Appendix to: Kaiser SV, Sundaram V, Cohen E, et al. Health care for children with diabetes mellitus from low-income families in Ontario and California: a population-based cohort study. *CMAJ Open* 2016. DOI: 10.9778/cmajo.20160075. Copyright ©2016 Joule Inc. or its licensors

|          |                                       |
|----------|---------------------------------------|
| 02340763 | GLYBURIDE                             |
| 02340771 | GLYBURIDE                             |
| 02341522 | METFORMIN HCL                         |
| 02341603 | METFORMIN HCL                         |
| 02343606 | METFORMIN HCL                         |
| 02343614 | METFORMIN HCL                         |
| 02345366 | PIOGLITAZONE HCL                      |
| 02345374 | PIOGLITAZONE HCL                      |
| 02345382 | PIOGLITAZONE HCL                      |
| 02345854 | GLYBURIDE                             |
| 02345862 | GLYBURIDE                             |
| 02348578 | GLICLAZIDE                            |
| 02350289 | METFORMIN HCL                         |
| 02350300 | METFORMIN HCL                         |
| 02350459 | GLYBURIDE                             |
| 02350467 | GLYBURIDE                             |
| 02353377 | METFORMIN HCL                         |
| 02353385 | METFORMIN HCL                         |
| 02354144 | ROSIGLITAZONE MALEATE                 |
| 02354152 | ROSIGLITAZONE MALEATE                 |
| 02354160 | ROSIGLITAZONE MALEATE                 |
| 02354349 | ROSIGLITAZONE MALEATE                 |
| 02354357 | ROSIGLITAZONE MALEATE                 |
| 02354365 | ROSIGLITAZONE MALEATE                 |
| 02354926 | REPAGLINIDE                           |
| 02354934 | REPAGLINIDE                           |
| 02354942 | REPAGLINIDE                           |
| 02355663 | REPAGLINIDE                           |
| 02355671 | REPAGLINIDE                           |
| 02355698 | REPAGLINIDE                           |
| 02356422 | GLICLAZIDE                            |
| 02357453 | REPAGLINIDE                           |
| 02357461 | REPAGLINIDE                           |
| 02357488 | REPAGLINIDE                           |
| 02357887 | ROSIGLITAZONE MALEATE & METFORMIN HCL |
| 02357895 | ROSIGLITAZONE MALEATE & METFORMIN HCL |
| 02357909 | ROSIGLITAZONE MALEATE & METFORMIN HCL |
| 02357917 | ROSIGLITAZONE MALEATE & METFORMIN HCL |
| 02357925 | ROSIGLITAZONE MALEATE & METFORMIN HCL |
| 02361264 | METFORMIN HCL                         |
| 02361272 | METFORMIN HCL                         |
| 02363232 | PIOGLITAZONE HCL                      |
| 02363240 | PIOGLITAZONE HCL                      |
| 02363259 | PIOGLITAZONE HCL                      |
| 02363518 | GLICLAZIDE                            |
| 02363704 | GLYBURIDE                             |

Appendix to: Kaiser SV, Sundaram V, Cohen E, et al. Health care for children with diabetes mellitus from low-income families in Ontario and California: a population-based cohort study. *CMAJ Open* 2016. DOI: 10.9778/cmajo.20160075. Copyright ©2016 Joule Inc. or its licensors

|          |                       |
|----------|-----------------------|
| 02363712 | GLYBURIDE             |
| 02364506 | METFORMIN HCL         |
| 02364514 | METFORMIN HCL         |
| 02365286 | METFORMIN HCL         |
| 02365294 | METFORMIN HCL         |
| 02365529 | PIOGLITAZONE HCL      |
| 02365537 | PIOGLITAZONE HCL      |
| 02366347 | REPAGLINIDE           |
| 02366355 | REPAGLINIDE           |
| 02366363 | REPAGLINIDE           |
| 02373270 | REPAGLINIDE           |
| 02373289 | REPAGLINIDE           |
| 02373297 | REPAGLINIDE           |
| 02374013 | PIOGLITAZONE HCL      |
| 02374021 | PIOGLITAZONE HCL      |
| 02374048 | PIOGLITAZONE HCL      |
| 02374587 | PIOGLITAZONE HCL      |
| 02374595 | PIOGLITAZONE HCL      |
| 02375842 | SAXAGLIPTIN HCL       |
| 02375850 | PIOGLITAZONE HCL      |
| 02375869 | PIOGLITAZONE HCL      |
| 02375877 | PIOGLITAZONE HCL      |
| 02378043 | METFORMIN HCL         |
| 02378051 | METFORMIN HCL         |
| 02378116 | METFORMIN HCL         |
| 02378124 | METFORMIN HCL         |
| 02378620 | METFORMIN HCL         |
| 02378639 | METFORMIN HCL         |
| 02378841 | METFORMIN HCL         |
| 02378868 | METFORMIN HCL         |
| 02379767 | METFORMIN HCL         |
| 02379775 | METFORMIN HCL         |
| 02380196 | METFORMIN HCL         |
| 02380218 | METFORMIN HCL         |
| 02380722 | METFORMIN HCL         |
| 02380730 | METFORMIN HCL         |
| 02384906 | PIOGLITAZONE HCL      |
| 02384914 | PIOGLITAZONE HCL      |
| 02384922 | PIOGLITAZONE HCL      |
| 02385341 | METFORMIN HCL         |
| 02385368 | METFORMIN HCL         |
| 02388766 | METFORMIN HCL         |
| 02388774 | METFORMIN HCL         |
| 02388839 | SITAGLIPTIN PHOSPHATE |
| 02388847 | SITAGLIPTIN PHOSPHATE |
| 02391600 | PIOGLITAZONE HCL      |

Appendix to: Kaiser SV, Sundaram V, Cohen E, et al. Health care for children with diabetes mellitus from low-income families in Ontario and California: a population-based cohort study. *CMAJ Open* 2016. DOI: 10.9778/cmajo.20160075. Copyright ©2016 Joule Inc. or its licensors

|                                                            |                                       |
|------------------------------------------------------------|---------------------------------------|
| 02397307                                                   | PIOGLITAZONE HCL                      |
| 02415968                                                   | REPAGLINIDE                           |
| 02415976                                                   | REPAGLINIDE HCL                       |
| 02415984                                                   | REPAGLINIDE HCL                       |
| 02416794                                                   | METFORMIN HCL & SITAGLIPTIN PHOSPHATE |
| 22022429                                                   | METFORMIN HCL                         |
| 22297850                                                   | METFORMIN HCL                         |
| 22399260                                                   | REPAGLINIDE                           |
| 25022429                                                   | METFORMIN HCL                         |
| 49012599                                                   | GLYBURIDE                             |
| 81913662                                                   | GLYBURIDE                             |
| 82148765                                                   | METFORMIN                             |
| 82167786                                                   | METFORMIN HCL                         |
| 99100755                                                   | METFORMIN HCL                         |
| <b>Codes Used to Identify Oral Hypoglycemic Use in CCS</b> |                                       |
| NDC                                                        | Generic Drug Name                     |
| 00093725401                                                | GLIMEPIRIDE 1 MG TABTEVA              |
| 00093725501                                                | GLIMEPIRIDE 2 MG TABTEVA              |
| 00093725601                                                | GLIMEPIRIDE 4 MG TABTEVA              |
| 00781504601                                                | GLIMEPIRIDE 2 MG TABSAND              |
| 16729000201                                                | GLIMEPIRIDE 2 MG TABACCO              |
| 16729000301                                                | GLIMEPIRIDE 4 MG TABACCO              |
| 45802077078                                                | GLIMEPIRIDE 1 MG TABPERR              |
| 45802082278                                                | GLIMEPIRIDE 2 MG TABPERR              |
| 45802094778                                                | GLIMEPIRIDE 4 MG TABPERR              |
| 55111032001                                                | GLIMEPIRIDE 1 MG TABDR.R              |
| 55111032101                                                | GLIMEPIRIDE 2 MG TABDR.R              |
| 55111032105                                                | GLIMEPIRIDE 2 MG TABDR.R              |
| 55111032201                                                | GLIMEPIRIDE 4 MG TABDR.R              |
| 55111032205                                                | GLIMEPIRIDE 4 MG TABDR.R              |
| 63304042501                                                | GLIMEPIRIDE 1 MG TABRANB              |
| 66993016302                                                | GLIMEPIRIDE 2 MG TABPRAS              |
| 66993016402                                                | GLIMEPIRIDE 4 MG TABPRAS              |
| 60505014201                                                | GLIPIZIDE 10 MG TABAPOT               |
| 00172365070                                                | GLIPIZIDE 10 MG TABIVAX               |
| 00378111001                                                | GLIPIZIDE 10 MG TABMYLA               |
| 00378111005                                                | GLIPIZIDE 10 MG TABMYLA               |
| 00781145301                                                | GLIPIZIDE 10 MG TABSAND               |
| 00781145310                                                | GLIPIZIDE 10 MG TABSAND               |
| 00591046105                                                | GLIPIZIDE 10 MG TABWATS               |
| 00591046110                                                | GLIPIZIDE 10 MG TABWATS               |
| 59762503101                                                | GLIPIZIDE 2.5 MGTABGRN1               |
| 00591090030                                                | GLIPIZIDE 2.5 MGTABWATS               |
| 60505014102                                                | GLIPIZIDE 5 MG TABAPOT                |
| 00172364960                                                | GLIPIZIDE 5 MG TABIVAX                |
| 68645015054                                                | GLIPIZIDE 5 MG TABLEGA                |

Appendix to: Kaiser SV, Sundaram V, Cohen E, et al. Health care for children with diabetes mellitus from low-income families in Ontario and California: a population-based cohort study. *CMAJ Open* 2016. DOI: 10.9778/cmajo.20160075. Copyright ©2016 Joule Inc. or its licensors



|             |                           |
|-------------|---------------------------|
| 00378110501 | GLIPIZIDE 5 MG TABMYLA    |
| 00378110505 | GLIPIZIDE 5 MG TABMYLA    |
| 00781145201 | GLIPIZIDE 5 MG TABSAND    |
| 00781145210 | GLIPIZIDE 5 MG TABSAND    |
| 00591046001 | GLIPIZIDE 5 MG TABWATS    |
| 00591046005 | GLIPIZIDE 5 MG TABWATS    |
| 00591046010 | GLIPIZIDE 5 MG TABWATS    |
| 00591084401 | GLIPIZIDE 5 MG TABWATS    |
| 00228275211 | GLYBMETFORHC2.5-50TABACTA |
| 00228275250 | GLYBMETFORHC2.5-50TABACTA |
| 00228275350 | GLYBMETFORHC5 MG-5TABACTA |
| 00093571201 | GLYBMETFORHC5 MG-5TABTEVA |
| 00093571205 | GLYBMETFORHC5 MG-5TABTEVA |
| 64720012410 | GLYBURIDE 2.5 MGTABCORE   |
| 00781114601 | GLYBURIDE 2.5 MGTABSAND   |
| 00093834301 | GLYBURIDE 2.5 MGTABTEVA   |
| 00093834310 | GLYBURIDE 2.5 MGTABTEVA   |
| 00093943305 | GLYBURIDE 2.5 MGTABTEVA   |
| 64720012510 | GLYBURIDE 5 MG TABCORE    |
| 64720012511 | GLYBURIDE 5 MG TABCORE    |
| 59762372707 | GLYBURIDE 5 MG TABGRN1    |
| 68645021154 | GLYBURIDE 5 MG TABLEGA    |
| 00781119101 | GLYBURIDE 5 MG TABSAND    |
| 00781119110 | GLYBURIDE 5 MG TABSAND    |
| 00093834401 | GLYBURIDE 5 MG TABTEVA    |
| 00093834410 | GLYBURIDE 5 MG TABTEVA    |
| 00093936401 | GLYBURIDE 5 MG TABTEVA    |
| 00093936405 | GLYBURIDE 5 MG TABTEVA    |
| 00093936410 | GLYBURIDE 5 MG TABTEVA    |
| 64720012310 | GLYBURIDE1.25 MG TABCORE  |
| 00093834201 | GLYBURIDE1.25 MG TABTEVA  |
| 62584025901 | METFORMIN 500 MGTABAHP    |
| 53746017801 | METFORMIN 500 MGTABAMNE   |
| 53746017805 | METFORMIN 500 MGTABAMNE   |
| 65162017510 | METFORMIN 500 MGTABAMNE   |
| 65162017511 | METFORMIN 500 MGTABAMNE   |
| 65162017550 | METFORMIN 500 MGTABAMNE   |
| 60505019000 | METFORMIN 500 MGTABAPOT   |
| 60505019001 | METFORMIN 500 MGTABAPOT   |
| 60505019008 | METFORMIN 500 MGTABAPOT   |
| 60505026001 | METFORMIN 500 MGTABAPOT   |
| 65862000801 | METFORMIN 500 MGTABAURO   |
| 65862000805 | METFORMIN 500 MGTABAURO   |
| 57664039713 | METFORMIN 500 MGTABCARA   |
| 57664039718 | METFORMIN 500 MGTABCARA   |
| 57664039751 | METFORMIN 500 MGTABCARA   |

Appendix to: Kaiser SV, Sundaram V, Cohen E, et al. Health care for children with diabetes mellitus from low-income families in Ontario and California: a population-based cohort study. *CMAJ Open* 2016. DOI: 10.9778/cmajo.20160075. Copyright ©2016 Joule Inc. or its licensors

|             |                         |
|-------------|-------------------------|
| 57664039753 | METFORMIN 500 MGTABCARA |
| 57664039758 | METFORMIN 500 MGTABCARA |
| 57664039788 | METFORMIN 500 MGTABCARA |
| 00185441601 | METFORMIN 500 MGTABEON  |
| 68462015905 | METFORMIN 500 MGTABGLEN |
| 68462015910 | METFORMIN 500 MGTABGLEN |
| 00172433160 | METFORMIN 500 MGTABIVAX |
| 00172433180 | METFORMIN 500 MGTABIVAX |
| 68645012059 | METFORMIN 500 MGTABLEGA |
| 00904563461 | METFORMIN 500 MGTABMAJO |
| 00904584980 | METFORMIN 500 MGTABMAJO |
| 53489046705 | METFORMIN 500 MGTABMUTU |
| 53489046710 | METFORMIN 500 MGTABMUTU |
| 00378023405 | METFORMIN 500 MGTABMYLA |
| 00378035205 | METFORMIN 500 MGTABMYLA |
| 00378718505 | METFORMIN 500 MGTABMYLA |
| 49884092101 | METFORMIN 500 MGTABPAR  |
| 63304086001 | METFORMIN 500 MGTABRANB |
| 63304086005 | METFORMIN 500 MGTABRANB |
| 00781505001 | METFORMIN 500 MGTABSAND |
| 00781505005 | METFORMIN 500 MGTABSAND |
| 00781505010 | METFORMIN 500 MGTABSAND |
| 00781505061 | METFORMIN 500 MGTABSAND |
| 43547024810 | METFORMIN 500 MGTABSOLC |
| 43547024850 | METFORMIN 500 MGTABSOLC |
| 62756014201 | METFORMIN 500 MGTABSUN  |
| 62756014202 | METFORMIN 500 MGTABSUN  |
| 00093104801 | METFORMIN 500 MGTABTEVA |
| 00093104810 | METFORMIN 500 MGTABTEVA |
| 00093726701 | METFORMIN 500 MGTABTEVA |
| 00093726710 | METFORMIN 500 MGTABTEVA |
| 62037057101 | METFORMIN 500 MGTABWATS |
| 62037057110 | METFORMIN 500 MGTABWATS |
| 62037067401 | METFORMIN 500 MGTABWATS |
| 62037067410 | METFORMIN 500 MGTABWATS |
| 68382002801 | METFORMIN 500 MGTABZYDU |
| 68382002805 | METFORMIN 500 MGTABZYDU |
| 68382002810 | METFORMIN 500 MGTABZYDU |
| 53746017901 | METFORMIN 750 MGTABAMNE |
| 00555010702 | METFORMIN 750 MGTABBAR2 |
| 62756014301 | METFORMIN 750 MGTABSUN  |
| 00093721201 | METFORMIN 750 MGTABTEVA |
| 62037057701 | METFORMIN 750 MGTABWATS |
| 65162017450 | METFORMIN 850 MGTABAMNE |
| 65862000901 | METFORMIN 850 MGTABAURO |
| 65862000905 | METFORMIN 850 MGTABAURO |

Appendix to: Kaiser SV, Sundaram V, Cohen E, et al. Health care for children with diabetes mellitus from low-income families in Ontario and California: a population-based cohort study. *CMAJ Open* 2016. DOI: 10.9778/cmajo.20160075. Copyright ©2016 Joule Inc. or its licensors

|             |                          |
|-------------|--------------------------|
| 57664043553 | METFORMIN 850 MGTABCARA  |
| 57664043558 | METFORMIN 850 MGTABCARA  |
| 00185021501 | METFORMIN 850 MGTABEON   |
| 68462016005 | METFORMIN 850 MGTABGLEN  |
| 00172433060 | METFORMIN 850 MGTABIVAX  |
| 00172433080 | METFORMIN 850 MGTABIVAX  |
| 00904585040 | METFORMIN 850 MGTABMAJO  |
| 00904609161 | METFORMIN 850 MGTABMAJO  |
| 53489046810 | METFORMIN 850 MGTABMUTU  |
| 00378718605 | METFORMIN 850 MGTABMYLA  |
| 00093104901 | METFORMIN 850 MGTABTEVA  |
| 00093104910 | METFORMIN 850 MGTABTEVA  |
| 68382002901 | METFORMIN 850 MGTABZYDU  |
| 68382002905 | METFORMIN 850 MGTABZYDU  |
| 68382002910 | METFORMIN 850 MGTABZYDU  |
| 65162017710 | METFORMIN1000 MG TABAMNE |
| 65162017711 | METFORMIN1000 MG TABAMNE |
| 65162017750 | METFORMIN1000 MG TABAMNE |
| 60505019200 | METFORMIN1000 MG TABAPOT |
| 60505019201 | METFORMIN1000 MG TABAPOT |
| 65862001001 | METFORMIN1000 MG TABAURO |
| 65862001005 | METFORMIN1000 MG TABAURO |
| 57664047451 | METFORMIN1000 MG TABCARA |
| 57664047453 | METFORMIN1000 MG TABCARA |
| 57664047458 | METFORMIN1000 MG TABCARA |
| 57664047488 | METFORMIN1000 MG TABCARA |
| 00185022101 | METFORMIN1000 MG TABEON  |
| 68462016105 | METFORMIN1000 MG TABGLEN |
| 68462016110 | METFORMIN1000 MG TABGLEN |
| 59762432200 | METFORMIN1000 MG TABGRN1 |
| 00172443260 | METFORMIN1000 MG TABIVAX |
| 00172443280 | METFORMIN1000 MG TABIVAX |
| 00904585140 | METFORMIN1000 MG TABMAJO |
| 53489046905 | METFORMIN1000 MG TABMUTU |
| 53489046910 | METFORMIN1000 MG TABMUTU |
| 00378024401 | METFORMIN1000 MG TABMYLA |
| 00378718705 | METFORMIN1000 MG TABMYLA |
| 00781505201 | METFORMIN1000 MG TABSAND |
| 00781505205 | METFORMIN1000 MG TABSAND |
| 00781505261 | METFORMIN1000 MG TABSAND |
| 43547025010 | METFORMIN1000 MG TABSOLC |
| 43547025050 | METFORMIN1000 MG TABSOLC |
| 00093721401 | METFORMIN1000 MG TABTEVA |
| 00093721410 | METFORMIN1000 MG TABTEVA |
| 00591245501 | METFORMIN1000 MG TABWATS |
| 62037067601 | METFORMIN1000 MG TABWATS |

Appendix to: Kaiser SV, Sundaram V, Cohen E, et al. Health care for children with diabetes mellitus from low-income families in Ontario and California: a population-based cohort study. *CMAJ Open* 2016. DOI: 10.9778/cmajo.20160075. Copyright ©2016 Joule Inc. or its licensors

|                                                                                                                                                                                                                                                                                                                                                                                                                                                                                                                                                                                                   |                                                                                                                         |
|---------------------------------------------------------------------------------------------------------------------------------------------------------------------------------------------------------------------------------------------------------------------------------------------------------------------------------------------------------------------------------------------------------------------------------------------------------------------------------------------------------------------------------------------------------------------------------------------------|-------------------------------------------------------------------------------------------------------------------------|
| 62037067610                                                                                                                                                                                                                                                                                                                                                                                                                                                                                                                                                                                       | METFORMIN1000 MG TABWATS                                                                                                |
| 68382003001                                                                                                                                                                                                                                                                                                                                                                                                                                                                                                                                                                                       | METFORMIN1000 MG TABZYDU                                                                                                |
| 68382003005                                                                                                                                                                                                                                                                                                                                                                                                                                                                                                                                                                                       | METFORMIN1000 MG TABZYDU                                                                                                |
| 68382003010                                                                                                                                                                                                                                                                                                                                                                                                                                                                                                                                                                                       | METFORMIN1000 MG TABZYDU                                                                                                |
| 00378313301                                                                                                                                                                                                                                                                                                                                                                                                                                                                                                                                                                                       | GLIPIZMETFOR5 MG-5TABMYLA                                                                                               |
| <b>Codes Used to Identify DM-Complication Hospitalizations and Emergency Visits</b>                                                                                                                                                                                                                                                                                                                                                                                                                                                                                                               |                                                                                                                         |
| California                                                                                                                                                                                                                                                                                                                                                                                                                                                                                                                                                                                        | ICD-9-CM codes 250.10, 250.11, 250.12, 250.13, 250.20, 250.21, 250.22, 250.23, 250.30, 250.31, 250.32, 250.33           |
| Ontario                                                                                                                                                                                                                                                                                                                                                                                                                                                                                                                                                                                           | ICD-10 codes E 10.0x, E 10.1x, E 10.64, E 11.0x, E 11.1x, E 11.64, E 13.0x, E 13.1x, E 13.64, E 14.0x, E 14.1x, E 14.64 |
| <b>DM-routine visits definition in Ontario</b>                                                                                                                                                                                                                                                                                                                                                                                                                                                                                                                                                    |                                                                                                                         |
| 1) visit provided by an endocrinologist, or 2) billed with a DM-preventive visit fee code [K030, K029, Q040, K045, K046], or 3) billed as a general consultation with a diagnosis code of DM by a family physician, pediatrician, or internist [ICD-9-CM code 250.xx and billing codes A005, A905, A006, A003, A004, A265, A565, A266, A263, A264, A661, A261, A262, A135, A765, A435, A136, A133, A134, A131, or A138], or 4) or having a diagnosis code for DM (ICD-9 code 250.xx) and occurring within 2 weeks of a billing claim for measurement of serum Hemoglobin A1C [OHIP fee code L093] |                                                                                                                         |
| <b>DM-routine visits definition in CCS</b>                                                                                                                                                                                                                                                                                                                                                                                                                                                                                                                                                        |                                                                                                                         |
| 1) visit provided by an endocrinologist, or 2) for DM care (ICD-9 code 250.xx)                                                                                                                                                                                                                                                                                                                                                                                                                                                                                                                    |                                                                                                                         |
